# Supplementary material for: A chronological map of 308 physical and mental health conditions from 4 million individuals in the English National Health Service
Source: PubMed Central journal article supplement (PMC6798263; doi:10.1016/s2589-7500(19)30012-3), 2019-05-20
Supplement: mmc1.pdf [file mmc1.pdf]

# THE LANCET

## Digital Health

### Supplementary appendix

This appendix formed part of the original submission and has been peer reviewed. We post it as supplied by the authors.

Supplement to: Kuan V, Denaxas S, Gonzalez-Izquierdo A, et al. A chronological map of 308 physical and mental health conditions from 4 million individuals in the National Health Service. *Lancet Digital Health* 2019; published online May 20. [http://dx.doi.org/10.1016/S2589-7500\(19\)30012-3](http://dx.doi.org/10.1016/S2589-7500(19)30012-3).

## Supplementary File.

### Comparison of disease frequency estimates from previous reports for specific conditions

Different studies may describe disease frequency using different measures such as incidence, cumulative incidence, lifetime prevalence, or lifetime risk, making direct comparisons difficult. Comparison of disease distribution between studies is further complicated by variation in case definitions. For example, the term “dermatitis” may include any or all of atopic eczema, contact dermatitis, seborrheic dermatitis, or any unspecified skin rash.

Our prevalence estimate for dermatitis (25.43%) was much higher than the GBD<sup>1</sup> estimate (6.82%), and the prevalence for “psoriasis or eczema” (0.7%) from the Barnett<sup>2</sup> study. The lifetime prevalence of atopic eczema from a 1994 survey of 1,077 English children aged 3 to 11 years is often cited at 20%<sup>3</sup>, and a 2003 Swedish survey of 8,469 individuals aged 20-59y reported the prevalence of eczema in adults at 14.6%<sup>4</sup>. Our estimates of 33% in children aged 1-9+years and 25.43% overall reflects the increase in prevalence of dermatitis over the years, as well as the inclusion of contact and unspecified dermatitis in our case definition.

A 2004 US survey of 162,705 individuals above the age of 12 found that 17.6% of females and 5.6% of males had current migraine<sup>5</sup>. We estimated the period prevalence of migraine to be 10.08% in females, and 3.85% in males. Our overall period prevalence of 6.97% is higher than the Barnett<sup>2</sup> estimate of 0.6%, but lower than the GBD<sup>1</sup> estimate of 20.65%. Migraneurs with mild to moderate symptoms may elect to self-treat and not consult their GPs, resulting in an underestimate of the prevalence from EHRs compared to surveys.

A survey in Great Britain conducted by Singleton et al in 2000 on 8,580 adults aged 16 to 74 years estimated the prevalence of depression to be 11%<sup>6</sup>, while the QOF prevalence was 7.3% for 2014-2015<sup>7</sup>. These were higher than the GBD<sup>1</sup> prevalence of 4.36%, and similar to the Barnett<sup>2</sup> estimate of 8.20%. Our period prevalence of 17.44% included past as well as present cases, and was therefore higher than these point estimates. The Singleton prevalence for anxiety of 9% was higher than those for GBD<sup>1</sup> (4.43%) and Barnett<sup>2</sup> (3.2%), but was, as expected, lower than our estimate of 12.96%.

Action on Hearing Loss estimates the prevalence for hearing loss to be 17% in the UK<sup>8</sup>, based on a study by Davis (1995)<sup>9</sup>. This is lower than the GBD 2017<sup>1</sup> estimate of 19.12% but higher than our (8.86%) and the Barnett<sup>2</sup> (3.4%) estimates. Many patients with hearing loss do not present to their GPs.

Public Health England (PHE) publishes the number of tuberculosis cases per annum, but not the prevalence. The case rate for 2015 was 1.05/10000<sup>10</sup>. This was consistent with our five-year cumulative incidence of TB of 5/10,000. Therefore, our period prevalence of 0.68% appears more consistent with PHE’s figures than the GBD<sup>1</sup> estimate of 9.02%.

The Respiratory Health of the Nation project in the UK based on The Health Improvement Network (THIN) primary care EHRs estimated the lifetime prevalence of asthma from 12,600,000 patient records to be 12.6% in 2012<sup>11</sup>. This was higher than the Barnett<sup>2</sup> point estimate of 6% and the GBD<sup>1</sup> prevalence of 8.37% but lower than our period prevalence of 14.99%, which also included hospital admissions.

The 20-year cumulative incidence of inguinal hernia from American hospital records for 13,452 people from 1971-1993 was calculated at 13.9% for men and 2.1% for women<sup>12</sup>. The lifetime risk from birth of inguinal hernias for a lifespan of 85 years from hospital admission records in 1976-1986 in Oxford, UK, was estimated to be 27.2% for males and 2.6% for females<sup>13</sup>. Our period prevalence estimates (11.75% for males, 3.39% for females, 7.57% for both sexes) included all abdominal wall hernias as did the GBD<sup>1</sup> estimate (0.38%).

**Supplementary Table S1.** Medical Conditions with the abbreviated terms used in this article and their disease categories

| <b>Condition</b>                                   | <b>Abbreviated Term</b>   | <b>Category</b>                    |
|----------------------------------------------------|---------------------------|------------------------------------|
| Benign Neoplasm – Brain                            | Benign Neo – Brain        | Benign Neoplasm/CIN                |
| Benign Neoplasm – Colon                            | Benign Neo – Colon        | Benign Neoplasm/CIN                |
| Benign Neoplasm – Ovary                            | Benign Neo – Ovary        | Benign Neoplasm/CIN                |
| Benign Neoplasm – Stomach                          | Benign Neo – Stomach      | Benign Neoplasm/CIN                |
| Benign Neoplasm – Uterus                           | Benign Neo – Uterus       | Benign Neoplasm/CIN                |
| Cervical Intra-epithelial Neoplasia                | CIN                       | Benign Neoplasm/CIN                |
| Haemangioma                                        | Haemangioma               | Benign Neoplasm/CIN                |
| Leiomyoma                                          | Leiomyoma                 | Benign Neoplasm/CIN                |
| Hodgkins Lymphoma                                  | Hodgkins Lymphoma         | Cancers                            |
| Leukaemia                                          | Leukaemia                 | Cancers                            |
| Monoclonal Gammopathy of Undetermined Significance | MGUS                      | Cancers                            |
| Myelodysplastic Syndrome                           | Myelodysplastic Syndrome  | Cancers                            |
| Non Hodgkins Lymphoma                              | Non Hodgkins Lymphoma     | Cancers                            |
| Plasma Cell Malignancy                             | Plasma Cell Ca            | Cancers                            |
| Polycythaemia vera                                 | Polycythaemia vera        | Cancers                            |
| Primary Malignancy – Biliary                       | Pri Ca – Biliary          | Cancers                            |
| Primary Malignancy – Bladder                       | Pri Ca – Bladder          | Cancers                            |
| Primary Malignancy – Bone                          | Pri Ca – Bone             | Cancers                            |
| Primary Malignancy – Bowel                         | Pri Ca – Bowel            | Cancers                            |
| Primary Malignancy – Brain                         | Pri Ca – Brain            | Cancers                            |
| Primary Malignancy – Breast                        | Pri Ca – Breast           | Cancers                            |
| Primary Malignancy – Cervix                        | Pri Ca – Cervix           | Cancers                            |
| Primary Malignancy – Kidney                        | Pri Ca – Kidney           | Cancers                            |
| Primary Malignancy – Liver                         | Pri Ca – Liver            | Cancers                            |
| Primary Malignancy – Lung                          | Pri Ca – Lung             | Cancers                            |
| Primary Malignancy – Melanoma                      | Pri Ca – Melanoma         | Cancers                            |
| Primary Malignancy – Mesothelioma                  | Pri Ca – Mesothelioma     | Cancers                            |
| Primary Malignancy – Multiple Sites                | Pri Ca – Multiple Sites   | Cancers                            |
| Primary Malignancy – Oesophageal                   | Pri Ca – Oesophageal      | Cancers                            |
| Primary Malignancy – Oropharyngeal                 | Pri Ca – Oropharyngeal    | Cancers                            |
| Primary Malignancy – other                         | Pri Ca – other            | Cancers                            |
| Primary Malignancy – Ovary                         | Pri Ca – Ovary            | Cancers                            |
| Primary Malignancy – Pancreas                      | Pri Ca – Pancreas         | Cancers                            |
| Primary Malignancy – Prostate                      | Pri Ca – Prostate         | Cancers                            |
| Primary Malignancy – Skin                          | Pri Ca – Skin             | Cancers                            |
| Primary Malignancy – Stomach                       | Pri Ca – Stomach          | Cancers                            |
| Primary Malignancy – Testis                        | Pri Ca – Testis           | Cancers                            |
| Primary Malignancy – Thyroid                       | Pri Ca – Thyroid          | Cancers                            |
| Primary Malignancy – Uterus                        | Pri Ca – Uterus           | Cancers                            |
| Secondary Malignancy – Adrenal                     | Sec Ca – Adrenal          | Cancers                            |
| Secondary Malignancy – Bone                        | Sec Ca – Bone             | Cancers                            |
| Secondary Malignancy – Bowel                       | Sec Ca – Bowel            | Cancers                            |
| Secondary Malignancy – Brain                       | Sec Ca – Brain            | Cancers                            |
| Secondary Malignancy – Liver                       | Sec Ca – Liver            | Cancers                            |
| Secondary Malignancy – Lung                        | Sec Ca – Lung             | Cancers                            |
| Secondary Malignancy – Lymph Nodes                 | Sec Ca – Lymph Nodes      | Cancers                            |
| Secondary Malignancy – other                       | Sec Ca – other            | Cancers                            |
| Secondary Malignancy – Peritoneum                  | Sec Ca – Peritoneum       | Cancers                            |
| Secondary Malignancy – Pleura                      | Sec Ca – Pleura           | Cancers                            |
| Abdominal Aortic Aneurysm                          | AAA                       | Diseases of the Circulatory System |
| Atrial Fibrillation                                | Atrial Fibrillation       | Diseases of the Circulatory System |
| Atrioventricular Block, first degree               | AV Block, first degree    | Diseases of the Circulatory System |
| Atrioventricular Block, second degree              | AV Block, second degree   | Diseases of the Circulatory System |
| Atrioventricular Block, third degree               | AV Block, third degree    | Diseases of the Circulatory System |
| Bifascicular Block                                 | Bifascicular Block        | Diseases of the Circulatory System |
| Cardiomyopathy – other                             | Cardiomyopathy – other    | Diseases of the Circulatory System |
| Coronary Heart Disease (not otherwise specified)   | CHD – nos                 | Diseases of the Circulatory System |
| Dilated cardiomyopathy                             | Dilated cardiomyopathy    | Diseases of the Circulatory System |
| Heart Failure                                      | Heart Failure             | Diseases of the Circulatory System |
| Hypertension                                       | Hypertension              | Diseases of the Circulatory System |
| Hypertrophic cardiomyopathy                        | HOCM                      | Diseases of the Circulatory System |
| Intracerebral Haemorrhage                          | Intracerebral Haemorrhage | Diseases of the Circulatory System |
| Ischaemic Stroke                                   | Ischaemic Stroke          | Diseases of the Circulatory System |
| Left Bundle Branch Block                           | LBBB                      | Diseases of the Circulatory System |
| Multiple valve disorder                            | Multiple valve disorder   | Diseases of the Circulatory System |

|                                                |                           |                                    |
|------------------------------------------------|---------------------------|------------------------------------|
| Myocardial Infarction                          | Myocardial Infarction     | Diseases of the Circulatory System |
| Non-rheumatic Aortic valve disorder            | Non-rheum Aortic valve dz | Diseases of the Circulatory System |
| Non-rheumatic Mitral valve disorder            | Non-rheum Mitral valve dz | Diseases of the Circulatory System |
| Pericardial Effusion                           | Pericardial Effusion      | Diseases of the Circulatory System |
| Peripheral Arterial Disease                    | PAD                       | Diseases of the Circulatory System |
| Primary Pulmonary Hypertension                 | Pri Pulmonary HTN         | Diseases of the Circulatory System |
| Pulmonary Embolism                             | Pulmonary Embolism        | Diseases of the Circulatory System |
| Raynauds Disease                               | Raynauds Disease          | Diseases of the Circulatory System |
| Rheumatic Valve Disorder                       | Rheum Valve dz            | Diseases of the Circulatory System |
| Right Bundle Branch Block                      | RBBB                      | Diseases of the Circulatory System |
| Secondary Pulmonary Hypertension               | Sec Pulmonary HTN         | Diseases of the Circulatory System |
| Sick Sinus Syndrome                            | Sick Sinus Syndrome       | Diseases of the Circulatory System |
| Stable Angina                                  | Stable Angina             | Diseases of the Circulatory System |
| Stroke – not otherwise specified               | Stroke – nos              | Diseases of the Circulatory System |
| Subarachnoid Haemorrhage                       | Subarach Haemorrhage      | Diseases of the Circulatory System |
| Subdural haematoma                             | Subdural haematoma        | Diseases of the Circulatory System |
| Supraventricular Tachycardia                   | SVT                       | Diseases of the Circulatory System |
| Transient Ischaemic Attack                     | TIA                       | Diseases of the Circulatory System |
| Trifascicular Block                            | Trifascicular Block       | Diseases of the Circulatory System |
| Unstable Angina                                | Unstable Angina           | Diseases of the Circulatory System |
| Venous thrombolism (Excl PE)                   | VTE (Excl PE)             | Diseases of the Circulatory System |
| Ventricular Tachycardia                        | Ventricular Tachycardia   | Diseases of the Circulatory System |
| Abdominal Hernia                               | Abdominal Hernia          | Diseases of the Digestive System   |
| Alcoholic Liver Disease                        | Alcoholic Liver Disease   | Diseases of the Digestive System   |
| Anal Fissure                                   | Anal Fissure              | Diseases of the Digestive System   |
| Angiodysplasia of colon                        | Angiodysplasia of colon   | Diseases of the Digestive System   |
| Anorectal Fistula                              | Anorectal Fistula         | Diseases of the Digestive System   |
| Anorectal Prolapse                             | Anorectal Prolapse        | Diseases of the Digestive System   |
| Appendicitis                                   | Appendicitis              | Diseases of the Digestive System   |
| Autoimmune liver disease                       | Autoimmune liver disease  | Diseases of the Digestive System   |
| Barrett's Oesophagus                           | Barrett's Oesophagus      | Diseases of the Digestive System   |
| Cholangitis                                    | Cholangitis               | Diseases of the Digestive System   |
| Cholecystitis                                  | Cholecystitis             | Diseases of the Digestive System   |
| Cholelithiasis                                 | Cholelithiasis            | Diseases of the Digestive System   |
| Cirrhosis                                      | Cirrhosis                 | Diseases of the Digestive System   |
| Coeliac Disease                                | Coeliac Disease           | Diseases of the Digestive System   |
| Crohns Disease                                 | Crohns Disease            | Diseases of the Digestive System   |
| Diaphragmatic Hernia                           | Diaphragmatic Hernia      | Diseases of the Digestive System   |
| Diverticular Disease                           | Diverticular Disease      | Diseases of the Digestive System   |
| Fatty Liver                                    | Fatty Liver               | Diseases of the Digestive System   |
| Gastritis                                      | Gastritis                 | Diseases of the Digestive System   |
| Gastro-oesophageal Reflux Disease              | GORD                      | Diseases of the Digestive System   |
| Irritable Bowel Syndrome                       | IBS                       | Diseases of the Digestive System   |
| Liver Failure                                  | Liver Failure             | Diseases of the Digestive System   |
| Oesophageal Ulcer                              | Oesophageal Ulcer         | Diseases of the Digestive System   |
| Oesophageal Varices                            | Oesophageal Varices       | Diseases of the Digestive System   |
| Pancreatitis                                   | Pancreatitis              | Diseases of the Digestive System   |
| Peptic Ulcer                                   | Peptic Ulcer              | Diseases of the Digestive System   |
| Peritonitis                                    | Peritonitis               | Diseases of the Digestive System   |
| Portal Hypertension                            | Portal Hypertension       | Diseases of the Digestive System   |
| Ulcerative Colitis                             | Ulcerative Colitis        | Diseases of the Digestive System   |
| Volvulus                                       | Volvulus                  | Diseases of the Digestive System   |
| Deafness                                       | Deafness                  | Diseases of the Ear                |
| Meniere's Disease                              | Meniere's Disease         | Diseases of the Ear                |
| Tinnitus                                       | Tinnitus                  | Diseases of the Ear                |
| Cystic Fibrosis                                | Cystic Fibrosis           | Diseases of the Endocrine System   |
| Diabetes Mellitus – other or not specified     | DM – other or nos         | Diseases of the Endocrine System   |
| Hyperparathyroidism                            | Hyperparathyroidism       | Diseases of the Endocrine System   |
| Low HDL-C                                      | Low HDL-C                 | Diseases of the Endocrine System   |
| Obesity                                        | Obesity                   | Diseases of the Endocrine System   |
| Polycystic Ovarian Syndrome                    | PCOS                      | Diseases of the Endocrine System   |
| Raised LDL-C                                   | Raised LDL-C              | Diseases of the Endocrine System   |
| Raised Total Cholesterol                       | Raised Total Cholesterol  | Diseases of the Endocrine System   |
| Raised Triglycerides                           | Raised Triglycerides      | Diseases of the Endocrine System   |
| Syndrome of Inappropriate AntiDiuretic Hormone | SIADH                     | Diseases of the Endocrine System   |
| Thyroid Disease                                | Thyroid Disease           | Diseases of the Endocrine System   |
| Type 1 Diabetes Mellitus                       | T1DM                      | Diseases of the Endocrine System   |
| Type 2 Diabetes Mellitus                       | T2DM                      | Diseases of the Endocrine System   |
| Anterior Uveitis                               | Anterior Uveitis          | Diseases of the Eye                |
| Blindness                                      | Blindness                 | Diseases of the Eye                |

|                                       |                            |                                         |
|---------------------------------------|----------------------------|-----------------------------------------|
| Cataract                              | Cataract                   | Diseases of the Eye                     |
| Diabetic Eye Disease                  | Diabetic Eye Disease       | Diseases of the Eye                     |
| Glaucoma                              | Glaucoma                   | Diseases of the Eye                     |
| Keratitis                             | Keratitis                  | Diseases of the Eye                     |
| Macular Degeneration                  | Macular Degeneration       | Diseases of the Eye                     |
| Posterior Uveitis                     | Posterior Uveitis          | Diseases of the Eye                     |
| Ptosis                                | Ptosis                     | Diseases of the Eye                     |
| Retinal Detachment                    | Retinal Detachment         | Diseases of the Eye                     |
| Retinal Vascular Occlusion            | Retinal Vascular Occlusion | Diseases of the Eye                     |
| Scleritis                             | Scleritis                  | Diseases of the Eye                     |
| Acute Kidney Injury                   | AKI                        | Diseases of the Genitourinary system    |
| Benign Prostatic Hyperplasia          | BPH                        | Diseases of the Genitourinary system    |
| Chronic Cystitis                      | Chronic Cystitis           | Diseases of the Genitourinary system    |
| Chronic Kidney Disease                | CKD                        | Diseases of the Genitourinary system    |
| Dysmenorrhoea                         | Dysmenorrhoea              | Diseases of the Genitourinary system    |
| End Stage Renal Disease               | End Stage Renal Disease    | Diseases of the Genitourinary system    |
| Endometrial Hyperplasia               | Endometrial Hyperplasia    | Diseases of the Genitourinary system    |
| Endometriosis                         | Endometriosis              | Diseases of the Genitourinary system    |
| Erectile Dysfunction                  | Erectile Dysfunction       | Diseases of the Genitourinary system    |
| Female Infertility                    | Female Infertility         | Diseases of the Genitourinary system    |
| Glomerulonephritis                    | Glomerulonephritis         | Diseases of the Genitourinary system    |
| Hydrocele                             | Hydrocele                  | Diseases of the Genitourinary system    |
| Male infertility                      | Male infertility           | Diseases of the Genitourinary system    |
| Menorrhagia                           | Menorrhagia                | Diseases of the Genitourinary system    |
| Neuropathic Bladder                   | Neuropathic Bladder        | Diseases of the Genitourinary system    |
| Obstructive and reflux uropathy       | Obstruct/reflux uropathy   | Diseases of the Genitourinary system    |
| Postcoital Bleeding                   | Postcoital Bleeding        | Diseases of the Genitourinary system    |
| Postmenopausal Bleeding               | Postmenopausal Bleeding    | Diseases of the Genitourinary system    |
| Tubulo-interstitial Nephropathy       | Tubulo-interstitial Nephro | Diseases of the Genitourinary system    |
| Undescended Testis                    | Undescended Testis         | Diseases of the Genitourinary system    |
| Urinary Incontinence                  | Urinary Incontinence       | Diseases of the Genitourinary system    |
| Urolithiasis                          | Urolithiasis               | Diseases of the Genitourinary system    |
| Uterovaginal Prolapse                 | Uterovaginal Prolapse      | Diseases of the Genitourinary system    |
| Allergic/chronic Rhinitis             | Allergic/chronic Rhinitis  | Diseases of the Respiratory System      |
| Asbestosis                            | Asbestosis                 | Diseases of the Respiratory System      |
| Aspiration Pneumonitis                | Aspiration Pneumonitis     | Diseases of the Respiratory System      |
| Asthma                                | Asthma                     | Diseases of the Respiratory System      |
| Bronchiectasis                        | Bronchiectasis             | Diseases of the Respiratory System      |
| Chronic Obstructive Pulmonary Disease | COPD                       | Diseases of the Respiratory System      |
| Chronic Sinusitis                     | Chronic Sinusitis          | Diseases of the Respiratory System      |
| Hypertrophic Nasal Turbinates         | Hypertroph Nasal Turbs     | Diseases of the Respiratory System      |
| Nasal Polyps                          | Nasal Polyps               | Diseases of the Respiratory System      |
| Pleural Effusion                      | Pleural Effusion           | Diseases of the Respiratory System      |
| Pleural Plaque                        | Pleural Plaque             | Diseases of the Respiratory System      |
| Pneumothorax                          | Pneumothorax               | Diseases of the Respiratory System      |
| Pulmonary Collapse                    | Pulmonary Collapse         | Diseases of the Respiratory System      |
| Pulmonary Fibrosis                    | Pulmonary Fibrosis         | Diseases of the Respiratory System      |
| Respiratory Failure                   | Respiratory Failure        | Diseases of the Respiratory System      |
| Sleep apnoea                          | Sleep apnoea               | Diseases of the Respiratory System      |
| Agranulocytosis                       | Agranulocytosis            | Haematological/Immunological conditions |
| Anaemia – other                       | Anaemia – other            | Haematological/Immunological conditions |
| Aplastic Anaemia                      | Aplastic Anaemia           | Haematological/Immunological conditions |
| Folate Deficiency Anaemia             | Folate Def Anaemia         | Haematological/Immunological conditions |
| Hypersplenism                         | Hypersplenism              | Haematological/Immunological conditions |
| Hyposplenism                          | Hyposplenism               | Haematological/Immunological conditions |
| Immunodeficiency                      | Immunodeficiency           | Haematological/Immunological conditions |
| Iron Deficiency Anaemia               | Iron Def Anaemia           | Haematological/Immunological conditions |
| Other haemolytic anaemia              | Other haemolytic anaemia   | Haematological/Immunological conditions |
| Primary thrombocytopaenia             | Pri thrombocytopaenia      | Haematological/Immunological conditions |
| Sarcoidosis                           | Sarcoidosis                | Haematological/Immunological conditions |
| Secondary Polycythaemia               | Sec Polycythaemia          | Haematological/Immunological conditions |
| Secondary Thrombocytopaenia           | Sec Thrombocytopaenia      | Haematological/Immunological conditions |
| Sickle Cell Disease                   | Sickle Cell Disease        | Haematological/Immunological conditions |
| Sickle Cell Trait                     | Sickle Cell Trait          | Haematological/Immunological conditions |
| Thalassaemia                          | Thalassaemia               | Haematological/Immunological conditions |
| Thalassaemia Trait                    | Thalassaemia Trait         | Haematological/Immunological conditions |
| Thrombophilia                         | Thrombophilia              | Haematological/Immunological conditions |
| Vitamin B12 deficiency anaemia        | B12 def anaemia            | Haematological/Immunological conditions |
| Bacterial Infection                   | ID-Bacterial               | Infectious Diseases                     |
| Chronic Viral Hepatitis               | Chronic Hepatitis          | Infectious Diseases                     |
| Encephalitis                          | Encephalitis               | Infectious Diseases                     |

|                                         |                              |                            |
|-----------------------------------------|------------------------------|----------------------------|
| Fungal Infection                        | ID-Fungal                    | Infectious Diseases        |
| HIV                                     | HIV                          | Infectious Diseases        |
| Infection – Anorectal                   | ID–Anorectal                 | Infectious Diseases        |
| Infection – Bone                        | ID–Bone                      | Infectious Diseases        |
| Infection – Digestive System            | ID–Digestive                 | Infectious Diseases        |
| Infection – Ear/Upper Respiratory Tract | URTI                         | Infectious Diseases        |
| Infection – Eye                         | ID–Eye                       | Infectious Diseases        |
| Infection – Heart                       | ID–Heart                     | Infectious Diseases        |
| Infection – Liver                       | ID–Liver                     | Infectious Diseases        |
| Infection – Lower Respiratory Tract     | LRTI                         | Infectious Diseases        |
| Infection – Male Genitourinary          | ID–Male GU                   | Infectious Diseases        |
| Infection – Other Genitourinary         | ID–Other GU                  | Infectious Diseases        |
| Infection – Other nervous system        | ID–Other nervous sys         | Infectious Diseases        |
| Infection – Other organisms             | ID–Other organisms           | Infectious Diseases        |
| Infection – Other organs                | ID–Other organs              | Infectious Diseases        |
| Infection – Skin                        | ID–Skin                      | Infectious Diseases        |
| Meningitis                              | Meningitis                   | Infectious Diseases        |
| Parasitic Infection                     | ID-Parasitic                 | Infectious Diseases        |
| Pelvic Inflammatory Disease             | PID                          | Infectious Diseases        |
| Rheumatic Fever                         | Rheumatic Fever              | Infectious Diseases        |
| Septicaemia                             | Septicaemia                  | Infectious Diseases        |
| Tuberculosis                            | Tuberculosis                 | Infectious Diseases        |
| Urinary Tract Infection                 | UTI                          | Infectious Diseases        |
| Viral Infection                         | ID-Viral                     | Infectious Diseases        |
| Alcohol Misuse                          | Alcohol Misuse               | Mental Health Disorders    |
| Anxiety                                 | Anxiety                      | Mental Health Disorders    |
| Autism                                  | Autism                       | Mental Health Disorders    |
| Bipolar Affective Disorder              | Bipolar Affective Disorder   | Mental Health Disorders    |
| Delirium                                | Delirium                     | Mental Health Disorders    |
| Dementia                                | Dementia                     | Mental Health Disorders    |
| Depression                              | Depression                   | Mental Health Disorders    |
| Eating Disorders                        | Eating Disorders             | Mental Health Disorders    |
| Hyperkinetic Disorders                  | Hyperkinetic Disorders       | Mental Health Disorders    |
| Intellectual Disability                 | Intellectual Disability      | Mental Health Disorders    |
| Obsessive Compulsive Disorder           | OCD                          | Mental Health Disorders    |
| Personality Disorder                    | Personality Disorder         | Mental Health Disorders    |
| Schizophrenia                           | Schizophrenia                | Mental Health Disorders    |
| Substance Misuse                        | Substance Misuse             | Mental Health Disorders    |
| Ankylosing Spondylosis                  | Ankylosing Spondylosis       | Musculoskeletal conditions |
| Carpal Tunnel Syndrome                  | Carpal Tunnel Syndrome       | Musculoskeletal conditions |
| Collapsed Vertebra                      | Collapsed Vertebra           | Musculoskeletal conditions |
| Enteropathic Arthropathy                | Enteropathic Arthropathy     | Musculoskeletal conditions |
| Enthesopathy and synovial disorder      | Enthesopathy                 | Musculoskeletal conditions |
| Fibromatosis                            | Fibromatosis                 | Musculoskeletal conditions |
| Fracture – Hip                          | Fracture – Hip               | Musculoskeletal conditions |
| Fracture – Wrist                        | Fracture – Wrist             | Musculoskeletal conditions |
| Giant Cell Arteritis                    | Giant Cell Arteritis         | Musculoskeletal conditions |
| Gout                                    | Gout                         | Musculoskeletal conditions |
| Intervertebral Disc Disorder            | Intervertebral Disc Disorder | Musculoskeletal conditions |
| Juvenile Arthritis                      | Juvenile Arthritis           | Musculoskeletal conditions |
| Lupus Erythematosus                     | Lupus Erythematosus          | Musculoskeletal conditions |
| Osteoarthritis                          | Osteoarthritis               | Musculoskeletal conditions |
| Osteoporosis                            | Osteoporosis                 | Musculoskeletal conditions |
| Polymyalgia Rheumatica                  | Polymyalgia Rheumatica       | Musculoskeletal conditions |
| Psoriatic Arthritis                     | Psoriatic Arthritis          | Musculoskeletal conditions |
| Reactive Arthritis                      | Reactive Arthritis           | Musculoskeletal conditions |
| Rheumatoid Arthritis                    | Rheumatoid Arthritis         | Musculoskeletal conditions |
| Scleroderma                             | Scleroderma                  | Musculoskeletal conditions |
| Scoliosis                               | Scoliosis                    | Musculoskeletal conditions |
| Sjogren Syndrome                        | Sjogren Syndrome             | Musculoskeletal conditions |
| Spinal Stenosis                         | Spinal Stenosis              | Musculoskeletal conditions |
| Spondylolisthesis                       | Spondylolisthesis            | Musculoskeletal conditions |
| Spondylosis                             | Spondylosis                  | Musculoskeletal conditions |
| Autonomic Neuropathy                    | Autonomic Neuropathy         | Neurological conditions    |
| Bell's Palsy                            | Bell's Palsy                 | Neurological conditions    |
| Cerebral Palsy                          | Cerebral Palsy               | Neurological conditions    |
| Chronic Fatigue Syndrome                | Chronic Fatigue Syndrome     | Neurological conditions    |
| Diabetic Neuropathy                     | Diabetic Neuropathy          | Neurological conditions    |
| Epilepsy                                | Epilepsy                     | Neurological conditions    |
| Essential Tremor                        | Essential Tremor             | Neurological conditions    |
| Idiopathic Intracranial Hypertension    | Idiopathic Intracranial HTN  | Neurological conditions    |

|                                     |                          |                         |
|-------------------------------------|--------------------------|-------------------------|
| Migraine                            | Migraine                 | Neurological conditions |
| Motor Neurone Disease               | Motor Neurone Disease    | Neurological conditions |
| Multiple Sclerosis                  | Multiple Sclerosis       | Neurological conditions |
| Myasthenia Gravis                   | Myasthenia Gravis        | Neurological conditions |
| Parkinson's Disease                 | Parkinson's Disease      | Neurological conditions |
| Peripheral Neuropathy               | Peripheral Neuropathy    | Neurological conditions |
| Trigeminal Neuralgia                | Trigeminal Neuralgia     | Neurological conditions |
| Congenital Septal Defect            | Congenital Septal Defect | Perinatal conditions    |
| Down Syndrome                       | Down Syndrome            | Perinatal conditions    |
| High Birth Weight                   | High Birth Weight        | Perinatal conditions    |
| Intrauterine Hypoxia                | Intrauterine Hypoxia     | Perinatal conditions    |
| Low Birth Weight                    | Low Birth Weight         | Perinatal conditions    |
| Neonatal Jaundice                   | Neonatal Jaundice        | Perinatal conditions    |
| Patent Ductus Arteriosus            | Patent Ductus Arteriosus | Perinatal conditions    |
| Post-term Delivery                  | Post-term Delivery       | Perinatal conditions    |
| Premature Delivery                  | Premature Delivery       | Perinatal conditions    |
| Respiratory Distress of the Newborn | Resp Distress Newborn    | Perinatal conditions    |
| Sepsis of the Newborn               | Sepsis of the Newborn    | Perinatal conditions    |
| Spina Bifida                        | Spina Bifida             | Perinatal conditions    |
| Acne                                | Acne                     | Skin conditions         |
| Actinic keratosis                   | Actinic keratosis        | Skin conditions         |
| Alopecia Areata                     | Alopecia Areata          | Skin conditions         |
| Dermatitis                          | Dermatitis               | Skin conditions         |
| Hidradenitis suppurativa            | Hidradenitis             | Skin conditions         |
| Lichen Planus                       | Lichen Planus            | Skin conditions         |
| Pilonidal cyst/sinus                | Pilonidal cyst/sinus     | Skin conditions         |
| Psoriasis                           | Psoriasis                | Skin conditions         |
| Rosacea                             | Rosacea                  | Skin conditions         |
| Seborrheic Dermatitis               | Seborrheic Dermatitis    | Skin conditions         |
| Urticaria                           | Urticaria                | Skin conditions         |
| Vitiligo                            | Vitiligo                 | Skin conditions         |

**Supplementary Table S2.** Ethnicity in CALIBER mapped to Five-level Ethnicity Category

| <b>CALIBER Category</b> | <b>CALIBER Definition</b>  | <b>Five-level Ethnicity Category</b> |
|-------------------------|----------------------------|--------------------------------------|
| 1                       | White British              | White                                |
| 2                       | White Irish                | White                                |
| 3                       | White Other                | White                                |
| 4                       | White NOS                  | White                                |
| 5                       | Mixed White and Black      | Mixed                                |
| 6                       | Mixed White and Asian      | Mixed                                |
| 7                       | Mixed Asian and Black      | Mixed                                |
| 8                       | Mixed Other                | Mixed                                |
| 9                       | Mixed NOS                  | Mixed                                |
| 10                      | Indian                     | South Asian                          |
| 11                      | Pakistani                  | South Asian                          |
| 12                      | Bangladeshi                | South Asian                          |
| 13                      | Other Asian                | South Asian                          |
| 15                      | Black Caribbean            | Black                                |
| 16                      | Black African              | Black                                |
| 17                      | Black Other                | Black                                |
| 19                      | Chinese                    | Other                                |
| 20                      | Other ethnic group         | Other                                |
| 21                      | Ethnic group not specified | Unknown                              |

**Supplementary Table S3.** Ethnicity in HES mapped to Five-level Ethnicity Category

| <b>gen_ ethnicity</b> | <b>Five-level Ethnicity Category</b> |
|-----------------------|--------------------------------------|
| Bangladesi            | South Asian                          |
| Bl_Afric              | Black                                |
| Bl_Carib              | Black                                |
| Bl_Other              | Black                                |
| Chinese               | Other                                |
| Indian                | South Asian                          |
| Mixed                 | Mixed                                |
| Oth_Asian             | South Asian                          |
| Other                 | Other                                |
| Pakistani             | South Asian                          |
| Unknown               | Other                                |
| White                 | White                                |



**Supplementary Table S4.** Sex-standardised period prevalence per 10000 (95% confidence intervals) from 1 April 2010 to 31 Mar 2015 for 308 medical conditions , stratified by age on 1 April 2010.

| Condition                                          | Category   | Age 0-9+ years | Age 10-19+ years | Age 20-29+ years | Age 30-39+ years | Age 40-49+ years | Age 50-59+ years | Age 60-69+ years | Age 70-79+ years | Age 80+ years  |
|----------------------------------------------------|------------|----------------|------------------|------------------|------------------|------------------|------------------|------------------|------------------|----------------|
| Benign Neoplasm – Brain                            | Benign Neo | --             | 3 (2, 3)         | 7 (6, 8)         | 13 (12, 14)      | 22 (21, 23)      | 35 (33, 36)      | 46 (44, 48)      | 65 (62, 68)      | 71 (68, 75)    |
| Benign Neoplasm – Colon                            | Benign Neo | 2 (2, 2)       | 7 (6, 8)         | 32 (31, 34)      | 75 (73, 78)      | 174 (170, 177)   | 388 (382, 394)   | 706 (697, 714)   | 879 (867, 891)   | 742 (729, 756) |
| Benign Neoplasm – Ovary                            | Benign Neo | 4 (3, 5)       | 113 (108, 117)   | 319 (313, 326)   | 496 (487, 504)   | 678 (668, 688)   | 593 (582, 603)   | 421 (411, 430)   | 325 (315, 335)   | 243 (234, 252) |
| Benign Neoplasm – Stomach                          | Benign Neo | --             | --               | 3 (2, 3)         | 9 (8, 10)        | 28 (27, 30)      | 69 (67, 72)      | 129 (126, 133)   | 188 (183, 194)   | 177 (171, 184) |
| Benign Neoplasm – Uterus                           | Benign Neo | --             | --               | 19 (17, 20)      | 87 (84, 91)      | 249 (243, 255)   | 380 (372, 388)   | 396 (387, 405)   | 305 (296, 315)   | 157 (150, 164) |
| Cervical Intra-epithelial Neoplasia                | Benign Neo | --             | --               | 287 (280, 293)   | 519 (510, 528)   | 444 (436, 452)   | 315 (308, 323)   | 189 (183, 195)   | 89 (84, 94)      | 32 (28, 35)    |
| Haemangioma                                        | Benign Neo | 149 (146, 153) | 103 (100, 106)   | 75 (73, 78)      | 104 (101, 106)   | 130 (127, 133)   | 153 (150, 157)   | 161 (157, 165)   | 150 (145, 155)   | 130 (124, 135) |
| Leiomyoma                                          | Benign Neo | --             | --               | 42 (39, 44)      | 249 (243, 255)   | 770 (760, 781)   | 953 (940, 966)   | 699 (687, 711)   | 385 (375, 396)   | 217 (208, 225) |
| Hodgkins Lymphoma                                  | Cancers    | --             | 3 (2, 3)         | 5 (5, 6)         | 7 (6, 8)         | 9 (9, 10)        | 9 (9, 10)        | 12 (11, 13)      | 11 (9, 12)       | 7 (6, 8)       |
| Leukaemia                                          | Cancers    | 5 (5, 6)       | 6 (5, 7)         | 6 (5, 7)         | 7 (6, 7)         | 9 (9, 10)        | 18 (17, 20)      | 41 (39, 43)      | 74 (71, 78)      | 92 (88, 97)    |
| Monoclonal Gammopathy of Undetermined Significance | Cancers    | --             | --               | --               | --               | 3 (2, 3)         | 8 (7, 9)         | 24 (22, 25)      | 53 (50, 56)      | 70 (66, 73)    |
| Myelodysplastic Syndrome                           | Cancers    | --             | --               | --               | --               | 2 (2, 3)         | 5 (5, 6)         | 15 (13, 16)      | 43 (40, 45)      | 91 (87, 96)    |
| Non Hodgkins Lymphoma                              | Cancers    | --             | 3 (2, 3)         | 5 (5, 6)         | 10 (9, 10)       | 16 (15, 17)      | 31 (30, 33)      | 63 (61, 66)      | 95 (91, 99)      | 98 (94, 103)   |
| Plasma Cell Malignancy                             | Cancers    | --             | --               | --               | --               | 3 (2, 3)         | 9 (8, 9)         | 23 (21, 24)      | 41 (38, 43)      | 48 (44, 51)    |
| Polycythaemia vera                                 | Cancers    | --             | --               | --               | 4 (3, 4)         | 8 (8, 9)         | 16 (15, 17)      | 24 (23, 26)      | 31 (29, 33)      | 31 (29, 34)    |
| Primary Malignancy – Biliary                       | Cancers    | --             | --               | --               | --               | --               | 4 (3, 5)         | 9 (8, 10)        | 15 (13, 16)      | 19 (17, 21)    |
| Primary Malignancy – Bladder                       | Cancers    | --             | --               | --               | 2 (2, 2)         | 8 (7, 8)         | 25 (23, 26)      | 83 (80, 86)      | 193 (188, 199)   | 295 (286, 304) |
| Primary Malignancy – Bone                          | Cancers    | --             | --               | 2 (2, 2)         | 3 (2, 3)         | 3 (3, 4)         | 4 (3, 4)         | 6 (5, 7)         | 8 (7, 9)         | 9 (8, 11)      |
| Primary Malignancy – Bowel                         | Cancers    | --             | --               | 2 (2, 2)         | 5 (4, 5)         | 18 (17, 19)      | 60 (58, 63)      | 156 (152, 160)   | 317 (310, 325)   | 437 (427, 447) |
| Primary Malignancy – Brain                         | Cancers    | 3 (2, 3)       | 4 (4, 5)         | 5 (5, 6)         | 6 (5, 7)         | 8 (8, 9)         | 12 (11, 13)      | 17 (15, 18)      | 20 (18, 21)      | 16 (14, 18)    |
| Primary Malignancy – Breast                        | Cancers    | --             | --               | 3 (3, 4)         | 21 (20, 23)      | 100 (97, 102)    | 209 (205, 214)   | 350 (344, 355)   | 383 (376, 391)   | 366 (358, 374) |
| Primary Malignancy – Cervix                        | Cancers    | --             | --               | 7 (6, 8)         | 17 (15, 18)      | 23 (22, 25)      | 31 (28, 33)      | 36 (33, 39)      | 33 (30, 36)      | 33 (30, 36)    |
| Primary Malignancy – Kidney                        | Cancers    | --             | --               | --               | --               | 7 (6, 7)         | 17 (16, 18)      | 39 (37, 41)      | 66 (63, 69)      | 67 (63, 71)    |
| Primary Malignancy – Liver                         | Cancers    | --             | --               | --               | --               | --               | 5 (5, 6)         | 10 (9, 11)       | 16 (15, 18)      | 15 (13, 16)    |
| Primary Malignancy – Lung                          | Cancers    | --             | --               | --               | --               | 9 (8, 10)        | 38 (36, 40)      | 108 (105, 112)   | 187 (181, 192)   | 183 (176, 189) |
| Primary Malignancy – Melanoma                      | Cancers    | --             | --               | 9 (8, 10)        | 23 (21, 24)      | 42 (40, 44)      | 65 (62, 67)      | 105 (101, 108)   | 143 (139, 148)   | 166 (160, 172) |
| Primary Malignancy – Mesothelioma                  | Cancers    | --             | --               | --               | --               | --               | --               | 7 (6, 8)         | 15 (13, 17)      | 12 (10, 14)    |
| Primary Malignancy – Multiple Sites                | Cancers    | --             | --               | --               | --               | --               | --               | 3 (3, 4)         | 7 (6, 8)         | 8 (6, 9)       |
| Primary Malignancy – Oesophageal                   | Cancers    | --             | --               | --               | --               | 3 (2, 3)         | 13 (12, 14)      | 30 (28, 32)      | 49 (46, 52)      | 57 (54, 61)    |
| Primary Malignancy – Oropharyngeal                 | Cancers    | --             | --               | --               | 3 (3, 4)         | 11 (10, 12)      | 27 (25, 28)      | 38 (36, 40)      | 46 (43, 48)      | 52 (48, 55)    |
| Primary Malignancy – other                         | Cancers    | 3 (3, 4)       | 4 (3, 4)         | 4 (4, 5)         | 8 (7, 9)         | 16 (15, 17)      | 36 (34, 38)      | 68 (66, 71)      | 106 (102, 110)   | 131 (126, 136) |
| Primary Malignancy – Ovary                         | Cancers    | --             | --               | --               | 7 (6, 8)         | 20 (18, 22)      | 41 (38, 43)      | 69 (65, 73)      | 88 (83, 93)      | 64 (59, 68)    |
| Primary Malignancy – Pancreas                      | Cancers    | --             | --               | --               | --               | 3 (2, 3)         | 9 (8, 10)        | 22 (20, 23)      | 39 (36, 41)      | 44 (41, 47)    |
| Primary Malignancy – Prostate                      | Cancers    | --             | --               | --               | --               | 12 (11, 14)      | 103 (99, 107)    | 432 (422, 441)   | 927 (910, 945)   | 1211 (1184,    |

|                                                  |                |           |             |             |                |                   |                   |                   |                   |                   |
|--------------------------------------------------|----------------|-----------|-------------|-------------|----------------|-------------------|-------------------|-------------------|-------------------|-------------------|
| Primary Malignancy – Skin                        | Cancers        | --        | --          | 8 (7, 8)    | 32 (31, 34)    | 103 (100, 105)    | 249 (244, 254)    | 584 (576, 591)    | 1127 (1114, 1141) | 1238              |
| Primary Malignancy – Stomach                     | Cancers        | --        | --          | --          | --             | 3 (2, 3)          | 9 (8, 10)         | 21 (20, 22)       | 46 (43, 49)       | 56 (53, 60)       |
| Primary Malignancy – Testis                      | Cancers        | --        | --          | 13 (11, 14) | 24 (22, 26)    | 29 (27, 31)       | 26 (24, 28)       | 19 (17, 20)       | 13 (11, 15)       | --                |
| Primary Malignancy – Thyroid                     | Cancers        | --        | --          | 3 (2, 3)    | 7 (6, 7)       | 8 (8, 9)          | 10 (9, 11)        | 11 (10, 12)       | 12 (10, 13)       | 9 (8, 11)         |
| Primary Malignancy – Uterus                      | Cancers        | --        | --          | --          | --             | 12 (10, 13)       | 42 (40, 45)       | 100 (96, 105)     | 137 (131, 144)    | 107 (101, 113)    |
| Secondary Malignancy – Adrenal                   | Cancers        | --        | --          | --          | --             | --                | 6 (5, 7)          | 13 (12, 14)       | 17 (16, 19)       | 12 (10, 14)       |
| Secondary Malignancy – Bone                      | Cancers        | --        | --          | --          | 4 (3, 4)       | 13 (12, 14)       | 33 (31, 35)       | 77 (74, 80)       | 135 (131, 140)    | 155 (148, 161)    |
| Secondary Malignancy – Bowel                     | Cancers        | --        | --          | --          | --             | --                | 3 (3, 4)          | 8 (7, 9)          | 12 (10, 13)       | 8 (7, 10)         |
| Secondary Malignancy – Brain                     | Cancers        | --        | --          | --          | 2 (1, 2)       | 7 (6, 7)          | 15 (14, 16)       | 29 (27, 31)       | 34 (32, 37)       | 29 (26, 31)       |
| Secondary Malignancy – Liver                     | Cancers        | --        | --          | --          | 5 (4, 5)       | 16 (15, 17)       | 42 (41, 44)       | 92 (88, 95)       | 149 (145, 154)    | 144 (139, 150)    |
| Secondary Malignancy – Lung                      | Cancers        | --        | --          | --          | 5 (4, 5)       | 12 (11, 13)       | 29 (27, 30)       | 62 (60, 65)       | 104 (100, 108)    | 91 (86, 95)       |
| Secondary Malignancy – Lymph Nodes               | Cancers        | --        | --          | 5 (4, 5)    | 15 (14, 16)    | 46 (44, 48)       | 96 (93, 99)       | 158 (154, 162)    | 196 (190, 201)    | 134 (129, 140)    |
| Secondary Malignancy – other                     | Cancers        | --        | --          | --          | 2 (2, 3)       | 8 (7, 8)          | 18 (16, 19)       | 37 (35, 38)       | 65 (61, 68)       | 82 (78, 86)       |
| Secondary Malignancy – Peritoneum                | Cancers        | --        | --          | --          | 2 (2, 3)       | 7 (6, 8)          | 19 (18, 20)       | 39 (37, 41)       | 53 (50, 56)       | 32 (30, 35)       |
| Secondary Malignancy – Pleura                    | Cancers        | --        | --          | --          | --             | 3 (2, 3)          | 8 (7, 9)          | 17 (16, 18)       | 27 (25, 29)       | 23 (21, 25)       |
| Abdominal Aortic Aneurysm                        | Cardiovascular | --        | --          | --          | --             | 4 (3, 4)          | 13 (12, 14)       | 91 (88, 94)       | 241 (235, 248)    | 391 (380, 401)    |
| Atrial Fibrillation                              | Cardiovascular | --        | 3 (2, 3)    | 11 (10, 12) | 27 (26, 28)    | 73 (71, 75)       | 213 (209, 217)    | 643 (635, 651)    | 1701 (1684, 1717) | 3229 (3202, 3256) |
| Atrioventricular Block, first degree             | Cardiovascular | --        | --          | --          | 2 (2, 3)       | 5 (5, 6)          | 13 (12, 14)       | 36 (34, 38)       | 127 (122, 131)    | 333 (324, 342)    |
| Atrioventricular Block, second degree            | Cardiovascular | --        | --          | --          | --             | 3 (2, 3)          | 6 (5, 7)          | 17 (16, 18)       | 51 (48, 54)       | 101 (96, 105)     |
| Atrioventricular Block, third degree             | Cardiovascular | --        | --          | --          | --             | 3 (2, 3)          | 7 (7, 8)          | 23 (22, 25)       | 74 (71, 78)       | 179 (173, 186)    |
| Bifascicular Block                               | Cardiovascular | --        | --          | --          | --             | --                | --                | 3 (3, 4)          | 13 (11, 14)       | 38 (35, 41)       |
| Cardiomyopathy – other                           | Cardiovascular | --        | 3 (3, 4)    | 5 (4, 5)    | 8 (7, 8)       | 16 (15, 17)       | 31 (30, 33)       | 59 (57, 61)       | 81 (77, 84)       | 75 (71, 79)       |
| Coronary Heart Disease (not otherwise specified) | Cardiovascular | --        | --          | 3 (2, 3)    | 8 (8, 9)       | 34 (32, 35)       | 94 (91, 97)       | 211 (207, 216)    | 386 (379, 394)    | 569 (558, 580)    |
| Dilated cardiomyopathy                           | Cardiovascular | --        | --          | --          | 4 (4, 5)       | 11 (10, 11)       | 21 (19, 22)       | 35 (33, 36)       | 45 (42, 47)       | 29 (26, 31)       |
| Heart Failure                                    | Cardiovascular | 5 (4, 6)  | 5 (4, 5)    | 7 (6, 8)    | 14 (13, 15)    | 45 (43, 46)       | 133 (130, 136)    | 362 (355, 368)    | 1022 (1010, 1035) | 2318 (2296, 2341) |
| Hypertension                                     | Cardiovascular | 9 (8, 10) | 20 (18, 21) | 91 (89, 94) | 370 (365, 375) | 1180 (1171, 1189) | 2655 (2640, 2670) | 4551 (4530, 4573) | 6476 (6444, 6508) | 7375 (7335, 7415) |
| Hypertrophic cardiomyopathy                      | Cardiovascular | --        | --          | --          | 2 (2, 3)       | 4 (4, 5)          | 8 (7, 9)          | 11 (10, 12)       | 15 (13, 16)       | 14 (12, 15)       |
| Intracerebral Haemorrhage                        | Cardiovascular | 3 (2, 3)  | 3 (2, 3)    | 3 (3, 4)    | 5 (5, 6)       | 12 (11, 13)       | 25 (23, 26)       | 51 (49, 53)       | 109 (104, 113)    | 184 (177, 190)    |
| Ischaemic Stroke                                 | Cardiovascular | 3 (2, 3)  | 2 (2, 3)    | 4 (4, 5)    | 12 (11, 12)    | 32 (30, 33)       | 85 (82, 88)       | 207 (202, 211)    | 501 (492, 510)    | 935 (921, 949)    |
| Left Bundle Branch Block                         | Cardiovascular | --        | --          | --          | 3 (2, 3)       | 10 (9, 11)        | 29 (28, 31)       | 74 (72, 77)       | 212 (207, 218)    | 435 (425, 445)    |
| Multiple valve disorder                          | Cardiovascular | --        | --          | 3 (2, 3)    | 5 (4, 5)       | 11 (10, 12)       | 29 (27, 31)       | 78 (75, 81)       | 232 (226, 238)    | 420 (410, 429)    |
| Myocardial Infarction                            | Cardiovascular | --        | --          | 4 (3, 4)    | 18 (17, 19)    | 89 (86, 91)       | 271 (266, 275)    | 558 (550, 565)    | 1108 (1095, 1122) | 1670 (1650, 1690) |
| Non-rheumatic Aortic valve disorder              | Cardiovascular | 5 (4, 5)  | 7 (6, 8)    | 8 (7, 9)    | 10 (9, 11)     | 19 (18, 20)       | 48 (46, 50)       | 141 (138, 145)    | 387 (379, 394)    | 697 (684, 709)    |
| Non-rheumatic Mitral valve                       | Cardiovascular | 3 (3, 4)  | 6 (5, 7)    | 11 (10, 12) | 21 (20, 22)    | 35 (34, 37)       | 68 (65, 70)       | 137 (133, 141)    | 301 (294, 308)    | 439 (429, 449)    |

|                                  |                |                |                |                |                |                |                |                   |                   |                   |
|----------------------------------|----------------|----------------|----------------|----------------|----------------|----------------|----------------|-------------------|-------------------|-------------------|
| disorder                         |                |                |                |                |                |                |                |                   |                   |                   |
| Pericardial Effusion             | Cardiovascular | 3 (3, 4)       | 3 (2, 3)       | 3 (3, 4)       | 5 (4, 6)       | 9 (8, 10)      | 17 (16, 18)    | 32 (30, 34)       | 52 (49, 55)       | 56 (53, 60)       |
| Peripheral Arterial Disease      | Cardiovascular | 3 (2, 3)       | 4 (3, 4)       | 6 (5, 6)       | 12 (11, 13)    | 36 (34, 37)    | 118 (115, 121) | 307 (302, 313)    | 637 (626, 647)    | 912 (898, 927)    |
| Primary Pulmonary Hypertension   | Cardiovascular | 5 (5, 6)       | --             | 2 (1, 2)       | 3 (2, 3)       | 5 (5, 6)       | 11 (10, 12)    | 27 (25, 28)       | 71 (67, 74)       | 119 (114, 124)    |
| Pulmonary Embolism               | Cardiovascular | --             | 3 (3, 4)       | 17 (16, 18)    | 32 (30, 33)    | 61 (59, 63)    | 100 (97, 103)  | 185 (181, 190)    | 325 (317, 332)    | 403 (394, 413)    |
| Raynauds Disease                 | Cardiovascular | 4 (3, 4)       | 52 (49, 54)    | 71 (69, 74)    | 86 (84, 88)    | 109 (106, 112) | 131 (128, 134) | 160 (156, 164)    | 181 (175, 186)    | 167 (161, 173)    |
| Rheumatic Valve Disorder         | Cardiovascular | --             | --             | 3 (2, 3)       | 4 (4, 5)       | 6 (6, 7)       | 14 (12, 15)    | 34 (32, 36)       | 84 (81, 88)       | 123 (118, 128)    |
| Right Bundle Branch Block        | Cardiovascular | --             | 6 (5, 7)       | 9 (8, 10)      | 11 (10, 11)    | 17 (16, 18)    | 34 (32, 35)    | 72 (69, 75)       | 182 (176, 187)    | 402 (393, 412)    |
| Secondary Pulmonary Hypertension | Cardiovascular | --             | --             | --             | --             | 3 (3, 4)       | 8 (7, 9)       | 17 (16, 18)       | 45 (43, 48)       | 65 (61, 69)       |
| Sick Sinus Syndrome              | Cardiovascular | --             | --             | --             | --             | 2 (2, 3)       | 5 (4, 6)       | 15 (14, 16)       | 52 (49, 55)       | 99 (95, 104)      |
| Stable Angina                    | Cardiovascular | --             | 3 (2, 3)       | 6 (5, 7)       | 23 (22, 24)    | 122 (119, 125) | 403 (397, 409) | 913 (903, 923)    | 1771 (1755, 1788) | 2290 (2268, 2313) |
| Stroke – not otherwise specified | Cardiovascular | --             | --             | 3 (3, 3)       | 8 (8, 9)       | 26 (24, 27)    | 70 (67, 72)    | 173 (169, 177)    | 410 (402, 418)    | 812 (799, 825)    |
| Subarachnoid Haemorrhage         | Cardiovascular | --             | --             | 4 (3, 4)       | 8 (8, 9)       | 19 (18, 20)    | 31 (30, 33)    | 43 (41, 45)       | 50 (47, 53)       | 50 (46, 53)       |
| Subdural haematoma               | Cardiovascular | --             | --             | --             | --             | 4 (3, 4)       | 6 (6, 7)       | 14 (13, 15)       | 39 (36, 41)       | 96 (91, 101)      |
| Supraventricular Tachycardia     | Cardiovascular | 7 (6, 8)       | 15 (14, 16)    | 28 (26, 29)    | 37 (35, 38)    | 55 (53, 57)    | 80 (77, 82)    | 130 (126, 133)    | 206 (200, 212)    | 256 (248, 263)    |
| Transient Ischaemic Attack       | Cardiovascular | --             | --             | 4 (3, 4)       | 11 (10, 12)    | 40 (38, 42)    | 119 (116, 122) | 305 (300, 311)    | 736 (725, 747)    | 1293 (1276, 1310) |
| Trifascicular Block              | Cardiovascular | --             | --             | --             | --             | --             | --             | 3 (3, 4)          | 16 (15, 18)       | 55 (51, 59)       |
| Unstable Angina                  | Cardiovascular | --             | --             | --             | 11 (10, 11)    | 56 (54, 58)    | 161 (158, 165) | 311 (305, 316)    | 582 (572, 591)    | 798 (785, 812)    |
| Venous thrombolism (Excl PE)     | Cardiovascular | 2 (2, 3)       | 7 (6, 8)       | 31 (30, 33)    | 70 (67, 72)    | 107 (104, 110) | 166 (162, 170) | 276 (271, 281)    | 444 (436, 452)    | 606 (594, 617)    |
| Ventricular Tachycardia          | Cardiovascular | --             | --             | 3 (3, 4)       | 5 (4, 5)       | 9 (8, 10)      | 19 (17, 20)    | 39 (37, 40)       | 73 (69, 76)       | 88 (84, 93)       |
| Abdominal Hernia                 | Digestive      | 292 (288, 297) | 283 (278, 288) | 294 (289, 298) | 423 (417, 428) | 625 (618, 631) | 853 (844, 861) | 1238 (1227, 1249) | 1690 (1673, 1706) | 2123 (2099, 2146) |
| Alcoholic Liver Disease          | Digestive      | --             | --             | 5 (4, 5)       | 22 (21, 23)    | 47 (46, 49)    | 74 (72, 77)    | 72 (69, 75)       | 44 (42, 47)       | 19 (17, 21)       |
| Anal Fissure                     | Digestive      | 83 (81, 85)    | 153 (149, 157) | 240 (235, 244) | 291 (286, 295) | 314 (309, 318) | 300 (295, 305) | 266 (260, 271)    | 233 (227, 239)    | 169 (162, 175)    |
| Angiodysplasia of colon          | Digestive      | --             | --             | --             | --             | 3 (2, 3)       | 7 (7, 8)       | 17 (15, 18)       | 34 (32, 36)       | 38 (35, 41)       |
| Anorectal Fistula                | Digestive      | 5 (5, 6)       | 12 (11, 14)    | 29 (28, 31)    | 50 (48, 51)    | 63 (61, 65)    | 70 (68, 73)    | 65 (62, 67)       | 61 (57, 64)       | 50 (46, 53)       |
| Anorectal Prolapse               | Digestive      | 8 (8, 9)       | 10 (9, 11)     | 11 (10, 12)    | 14 (13, 15)    | 19 (18, 21)    | 30 (29, 32)    | 54 (52, 56)       | 82 (79, 86)       | 145 (140, 151)    |
| Appendicitis                     | Digestive      | 41 (40, 43)    | 261 (257, 266) | 418 (413, 423) | 533 (527, 539) | 689 (682, 696) | 795 (787, 803) | 854 (844, 863)    | 801 (790, 812)    | 678 (666, 690)    |
| Autoimmune liver disease         | Digestive      | --             | --             | 2 (2, 2)       | 2 (2, 3)       | 5 (5, 6)       | 10 (9, 11)     | 15 (14, 16)       | 21 (19, 23)       | 11 (9, 12)        |
| Barrett's Oesophagus             | Digestive      | --             | --             | 4 (3, 4)       | 10 (10, 11)    | 30 (29, 31)    | 68 (66, 71)    | 122 (119, 126)    | 166 (161, 171)    | 180 (174, 187)    |
| Cholangitis                      | Digestive      | --             | --             | 3 (2, 3)       | 4 (4, 5)       | 8 (7, 9)       | 15 (14, 17)    | 31 (29, 33)       | 61 (58, 64)       | 108 (103, 113)    |
| Cholecystitis                    | Digestive      | --             | 12 (11, 13)    | 65 (63, 67)    | 117 (114, 120) | 179 (175, 182) | 234 (230, 239) | 315 (309, 320)    | 383 (375, 391)    | 388 (379, 398)    |
| Cholelithiasis                   | Digestive      | 6 (5, 7)       | 25 (23, 26)    | 115 (112, 117) | 205 (201, 209) | 323 (318, 328) | 442 (436, 449) | 621 (613, 628)    | 832 (821, 843)    | 958 (943, 972)    |
| Cirrhosis                        | Digestive      | --             | --             | 5 (4, 6)       | 17 (16, 18)    | 40 (38, 42)    | 66 (64, 68)    | 73 (70, 76)       | 67 (64, 70)       | 38 (35, 40)       |
| Coeliac Disease                  | Digestive      | 13 (12, 14)    | 22 (21, 24)    | 23 (22, 25)    | 26 (25, 27)    | 37 (35, 38)    | 43 (41, 45)    | 53 (50, 55)       | 57 (54, 60)       | 37 (35, 40)       |
| Crohns Disease                   | Digestive      | --             | 19 (18, 20)    | 39 (38, 41)    | 46 (44, 47)    | 52 (50, 54)    | 54 (52, 56)    | 56 (54, 59)       | 54 (51, 57)       | 46 (43, 49)       |
| Diaphragmatic Hernia             | Digestive      | 4 (3, 4)       | 18 (17, 19)    | 71 (68, 73)    | 158 (155, 161) | 335 (330, 339) | 611 (604, 618) | 1005 (995, 1015)  | 1470 (1455, 1485) | 1772 (1753, 1792) |
| Diverticular Disease             | Digestive      | --             | --             | 9 (8, 10)      | 37 (36, 39)    | 149 (146, 152) | 450 (444, 457) | 992 (982, 1002)   | 1717 (1700, 1733) | 2105 (2083, 2126) |
| Fatty Liver                      | Digestive      | --             | 4 (3, 4)       | 12 (11, 13)    | 30 (29, 31)    | 52 (50, 54)    | 79 (76, 81)    | 77 (74, 80)       | 60 (57, 63)       | 30 (28, 33)       |
| Gastritis                        | Digestive      | 66 (63, 68)    | 185 (181, 189) | 303 (298, 307) | 412 (406, 417) | 615 (608, 621) | 840 (831, 848) | 1101 (1090, 1111) | 1451 (1436, 1466) | 1460 (1442, 1478) |

|                                                |           |                |                |                |                   |                   |                   |                   |                   |                   |
|------------------------------------------------|-----------|----------------|----------------|----------------|-------------------|-------------------|-------------------|-------------------|-------------------|-------------------|
| Gastro-oesophageal Reflux Disease              | Digestive | 502 (497, 508) | 220 (215, 224) | 363 (358, 368) | 608 (602, 615)    | 935 (926, 943)    | 1255 (1245, 1266) | 1614 (1601, 1626) | 1869 (1852, 1886) | 1699 (1680, 1719) |
| Irritable Bowel Syndrome                       | Digestive | 8 (7, 8)       | 186 (182, 191) | 549 (543, 555) | 719 (712, 726)    | 839 (832, 847)    | 865 (856, 874)    | 840 (831, 849)    | 727 (717, 738)    | 528 (518, 539)    |
| Liver Failure                                  | Digestive | --             | --             | 4 (4, 5)       | 8 (7, 9)          | 15 (14, 16)       | 23 (22, 24)       | 26 (25, 28)       | 29 (27, 32)       | 29 (26, 32)       |
| Oesophageal Ulcer                              | Digestive | 106 (104, 109) | 67 (65, 70)    | 154 (151, 157) | 307 (302, 312)    | 536 (530, 542)    | 810 (802, 819)    | 1115 (1104, 1126) | 1373 (1358, 1388) | 1415 (1397, 1433) |
| Oesophageal Varices                            | Digestive | --             | --             | 2 (2, 2)       | 6 (5, 7)          | 14 (13, 15)       | 25 (24, 27)       | 30 (28, 31)       | 28 (26, 31)       | 17 (15, 18)       |
| Pancreatitis                                   | Digestive | --             | 6 (6, 7)       | 22 (21, 24)    | 39 (38, 41)       | 59 (57, 61)       | 77 (74, 79)       | 103 (100, 106)    | 140 (135, 144)    | 166 (160, 172)    |
| Peptic Ulcer                                   | Digestive | --             | 8 (7, 9)       | 30 (28, 31)    | 68 (66, 71)       | 155 (152, 159)    | 293 (288, 298)    | 471 (464, 478)    | 764 (753, 775)    | 976 (961, 991)    |
| Peritonitis                                    | Digestive | 11 (10, 11)    | 22 (20, 23)    | 27 (26, 29)    | 33 (32, 35)       | 52 (50, 54)       | 77 (74, 80)       | 110 (107, 114)    | 159 (154, 164)    | 198 (192, 205)    |
| Portal Hypertension                            | Digestive | --             | --             | 2 (2, 3)       | 7 (6, 7)          | 15 (14, 16)       | 25 (23, 26)       | 26 (24, 27)       | 23 (21, 25)       | 10 (9, 12)        |
| Ulcerative Colitis                             | Digestive | --             | 15 (14, 16)    | 41 (39, 43)    | 57 (55, 59)       | 70 (68, 73)       | 89 (86, 92)       | 115 (112, 118)    | 122 (118, 127)    | 112 (107, 117)    |
| Volvulus                                       | Digestive | --             | --             | 3 (2, 3)       | 4 (3, 4)          | 7 (6, 7)          | 12 (11, 13)       | 21 (20, 23)       | 36 (33, 38)       | 57 (53, 60)       |
| Deafness                                       | Ear       | 301 (296, 305) | 556 (549, 563) | 480 (474, 486) | 385 (380, 390)    | 529 (523, 535)    | 795 (786, 803)    | 1285 (1274, 1296) | 2094 (2075, 2112) | 3321 (3294, 3348) |
| Meniere's Disease                              | Ear       | --             | --             | 3 (3, 4)       | 11 (10, 12)       | 22 (21, 23)       | 45 (43, 47)       | 76 (73, 78)       | 110 (106, 114)    | 143 (138, 149)    |
| Tinnitus                                       | Ear       | 6 (6, 7)       | 44 (42, 46)    | 96 (93, 98)    | 179 (175, 182)    | 284 (280, 288)    | 492 (486, 499)    | 661 (653, 669)    | 720 (709, 730)    | 670 (657, 682)    |
| Cystic Fibrosis                                | Endocrine | 5 (4, 5)       | 5 (4, 5)       | 4 (3, 4)       | 3 (3, 3)          | 5 (4, 5)          | 5 (4, 6)          | 7 (6, 8)          | 5 (4, 6)          | --                |
| Diabetes Mellitus – other or not specified     | Endocrine | --             | 5 (5, 6)       | 12 (11, 12)    | 22 (21, 24)       | 30 (28, 31)       | 43 (41, 45)       | 61 (58, 63)       | 90 (86, 93)       | 97 (92, 101)      |
| Hyperparathyroidism                            | Endocrine | --             | --             | 3 (2, 3)       | 5 (5, 6)          | 12 (11, 13)       | 23 (21, 24)       | 41 (39, 43)       | 73 (70, 77)       | 90 (86, 94)       |
| Low HDL-C                                      | Endocrine | --             | 17 (16, 19)    | 77 (74, 79)    | 278 (273, 282)    | 688 (682, 695)    | 1052 (1042, 1061) | 1440 (1428, 1452) | 1728 (1712, 1745) | 1303 (1286, 1320) |
| Obesity                                        | Endocrine | --             | 804 (786, 822) | 953 (945, 961) | 1470 (1460, 1480) | 2154 (2142, 2166) | 2639 (2623, 2654) | 2969 (2952, 2987) | 2973 (2952, 2995) | 1894 (1874, 1915) |
| Polycystic Ovarian Syndrome                    | Endocrine | --             | 86 (82, 90)    | 270 (264, 276) | 241 (235, 246)    | 86 (83, 90)       | 20 (18, 22)       | 7 (6, 8)          | --                | --                |
| Raised LDL-C                                   | Endocrine | --             | 14 (13, 15)    | 88 (86, 91)    | 436 (430, 442)    | 1452 (1442, 1462) | 2746 (2730, 2761) | 3698 (3679, 3718) | 3683 (3659, 3707) | 2595 (2571, 2618) |
| Raised Total Cholesterol                       | Endocrine | --             | 21 (20, 23)    | 130 (127, 133) | 649 (642, 656)    | 2205 (2192, 2217) | 4172 (4153, 4191) | 5629 (5606, 5653) | 5941 (5911, 5971) | 4772 (4740, 4804) |
| Raised Triglycerides                           | Endocrine | --             | 11 (10, 12)    | 64 (62, 66)    | 312 (307, 317)    | 966 (958, 974)    | 1900 (1887, 1912) | 2712 (2696, 2729) | 2971 (2949, 2992) | 2016 (1995, 2037) |
| Syndrome of Inappropriate AntiDiuretic Hormone | Endocrine | --             | --             | --             | --                | --                | 3 (2, 3)          | 7 (6, 8)          | 21 (19, 23)       | 43 (40, 46)       |
| Thyroid Disease                                | Endocrine | 13 (13, 14)    | 52 (50, 54)    | 144 (141, 147) | 298 (294, 303)    | 468 (462, 474)    | 710 (702, 718)    | 943 (934, 953)    | 1225 (1212, 1239) | 1466 (1449, 1483) |
| Type 1 Diabetes Mellitus                       | Endocrine | 17 (16, 18)    | 47 (45, 49)    | 48 (46, 50)    | 51 (49, 53)       | 55 (53, 57)       | 49 (47, 51)       | 38 (36, 40)       | 33 (31, 36)       | 23 (21, 25)       |
| Type 2 Diabetes Mellitus                       | Endocrine | --             | 5 (4, 6)       | 29 (27, 30)    | 126 (124, 129)    | 382 (376, 387)    | 820 (811, 828)    | 1323 (1311, 1334) | 1936 (1919, 1954) | 1761 (1741, 1781) |
| Anterior Uveitis                               | Eye       | 3 (2, 3)       | 12 (11, 13)    | 27 (26, 28)    | 49 (48, 51)       | 75 (73, 78)       | 105 (102, 108)    | 123 (120, 127)    | 147 (142, 151)    | 157 (151, 162)    |
| Blindness                                      | Eye       | 18 (17, 19)    | 32 (30, 33)    | 35 (34, 37)    | 37 (35, 38)       | 55 (53, 57)       | 82 (79, 85)       | 135 (131, 139)    | 308 (301, 315)    | 874 (861, 888)    |
| Cataract                                       | Eye       | 9 (8, 10)      | 16 (15, 17)    | 19 (18, 20)    | 33 (32, 35)       | 92 (90, 95)       | 297 (292, 302)    | 946 (936, 956)    | 2755 (2734, 2775) | 5083 (5050, 5116) |
| Diabetic Eye Disease                           | Eye       | --             | 11 (10, 12)    | 24 (22, 25)    | 51 (49, 53)       | 121 (118, 124)    | 252 (248, 257)    | 424 (418, 431)    | 685 (675, 695)    | 609 (598, 621)    |
| Glaucoma                                       | Eye       | 2 (2, 2)       | 4 (3, 4)       | 5 (5, 6)       | 14 (13, 15)       | 48 (46, 50)       | 130 (126, 133)    | 319 (313, 325)    | 666 (656, 677)    | 1167 (1151, 1183) |
| Keratitis                                      | Eye       | 5 (4, 6)       | 17 (16, 18)    | 31 (30, 33)    | 44 (43, 46)       | 56 (54, 58)       | 64 (61, 66)       | 75 (72, 77)       | 95 (91, 99)       | 114 (109, 119)    |

|                                 |               |                |                |                 |                   |                   |                   |                   |                   |                   |
|---------------------------------|---------------|----------------|----------------|-----------------|-------------------|-------------------|-------------------|-------------------|-------------------|-------------------|
| Macular Degeneration            | Eye           | --             | --             | 3 (3, 4)        | 7 (7, 8)          | 18 (17, 19)       | 51 (49, 53)       | 164 (160, 168)    | 523 (514, 532)    | 1348 (1331, 1365) |
| Posterior Uveitis               | Eye           | --             | --             | 3 (2, 3)        | 4 (4, 5)          | 6 (6, 7)          | 8 (7, 9)          | 9 (8, 10)         | 12 (10, 13)       | 12 (10, 14)       |
| Ptosis                          | Eye           | 17 (16, 18)    | 22 (21, 24)    | 17 (16, 18)     | 17 (16, 18)       | 24 (23, 25)       | 38 (37, 40)       | 63 (61, 66)       | 99 (95, 103)      | 121 (116, 126)    |
| Retinal Detachment              | Eye           | --             | 5 (4, 6)       | 11 (10, 11)     | 20 (18, 21)       | 37 (36, 39)       | 72 (70, 75)       | 128 (124, 132)    | 166 (161, 171)    | 168 (162, 174)    |
| Retinal Vascular Occlusion      | Eye           | --             | --             | --              | 3 (2, 3)          | 9 (8, 10)         | 27 (25, 28)       | 71 (69, 74)       | 165 (160, 170)    | 272 (265, 280)    |
| Scleritis                       | Eye           | 5 (5, 6)       | 16 (15, 17)    | 19 (18, 20)     | 32 (30, 33)       | 56 (54, 58)       | 75 (72, 77)       | 79 (76, 81)       | 76 (72, 79)       | 58 (54, 61)       |
| Acute Kidney Injury             | Genitourinary | 4 (3, 4)       | 8 (7, 9)       | 16 (15, 17)     | 24 (23, 26)       | 46 (44, 48)       | 103 (100, 106)    | 249 (244, 254)    | 696 (686, 707)    | 1644 (1625, 1663) |
| Benign Prostatic Hyperplasia    | Genitourinary | --             | --             | 4 (3, 5)        | 17 (16, 19)       | 112 (108, 116)    | 546 (537, 556)    | 1636 (1618, 1654) | 3099 (3066, 3131) | 4201 (4151, 4251) |
| Chronic Cystitis                | Genitourinary | --             | --             | 7 (6, 7)        | 10 (9, 10)        | 14 (13, 15)       | 22 (21, 23)       | 39 (37, 40)       | 63 (60, 66)       | 65 (61, 69)       |
| Chronic Kidney Disease          | Genitourinary | --             | --             | 3 (3, 4)        | 9 (8, 10)         | 33 (31, 34)       | 140 (136, 143)    | 611 (603, 619)    | 1906 (1889, 1923) | 3209 (3183, 3235) |
| Dysmenorrhoea                   | Genitourinary | 13 (12, 15)    | 903 (890, 915) | 993 (982, 1005) | 869 (858, 880)    | 919 (908, 930)    | 674 (663, 685)    | 282 (274, 290)    | 76 (71, 81)       | 24 (21, 27)       |
| End Stage Renal Disease         | Genitourinary | 3 (2, 3)       | 4 (3, 4)       | 7 (6, 7)        | 10 (10, 11)       | 18 (17, 19)       | 30 (28, 32)       | 46 (44, 48)       | 89 (85, 93)       | 120 (115, 126)    |
| Endometrial Hyperplasia         | Genitourinary | --             | --             | 11 (10, 13)     | 41 (39, 44)       | 124 (120, 128)    | 162 (157, 168)    | 131 (125, 136)    | 89 (84, 94)       | 45 (41, 49)       |
| Endometriosis                   | Genitourinary | --             | 28 (26, 30)    | 166 (161, 171)  | 379 (371, 386)    | 511 (503, 520)    | 373 (365, 381)    | 187 (181, 193)    | 93 (87, 98)       | 48 (44, 52)       |
| Erectile Dysfunction            | Genitourinary | --             | 34 (31, 36)    | 181 (175, 186)  | 348 (341, 355)    | 814 (804, 825)    | 1551 (1535, 1568) | 2306 (2284, 2328) | 2227 (2199, 2254) | 1084 (1059, 1109) |
| Female Infertility              | Genitourinary | --             | 14 (12, 15)    | 215 (209, 220)  | 598 (589, 608)    | 575 (566, 585)    | 305 (297, 312)    | 134 (128, 139)    | 58 (54, 62)       | 24 (21, 27)       |
| Glomerulonephritis              | Genitourinary | 9 (8, 9)       | 17 (16, 18)    | 19 (18, 20)     | 26 (25, 28)       | 36 (34, 37)       | 52 (50, 54)       | 90 (87, 93)       | 198 (193, 204)    | 402 (393, 412)    |
| Hydrocele                       | Genitourinary | 207 (202, 213) | 238 (232, 245) | 179 (174, 184)  | 130 (125, 134)    | 131 (127, 135)    | 156 (151, 161)    | 222 (216, 229)    | 335 (325, 346)    | 435 (419, 451)    |
| Male infertility                | Genitourinary | --             | --             | 51 (49, 54)     | 140 (136, 145)    | 136 (132, 140)    | 85 (81, 88)       | 44 (41, 47)       | 14 (12, 16)       | --                |
| Menorrhagia                     | Genitourinary | 20 (19, 22)    | 846 (833, 858) | 994 (982, 1006) | 1470 (1456, 1485) | 2788 (2768, 2808) | 2654 (2632, 2675) | 1410 (1393, 1427) | 487 (475, 499)    | 191 (183, 199)    |
| Neuropathic Bladder             | Genitourinary | 10 (9, 11)     | 25 (23, 26)    | 32 (31, 34)     | 43 (41, 45)       | 81 (78, 83)       | 126 (123, 129)    | 191 (187, 196)    | 255 (248, 261)    | 259 (251, 266)    |
| Obstructive and reflux uropathy | Genitourinary | 44 (42, 45)    | 58 (56, 61)    | 49 (47, 51)     | 48 (47, 50)       | 60 (58, 62)       | 77 (75, 80)       | 117 (114, 121)    | 199 (193, 204)    | 272 (264, 280)    |
| Postcoital Bleeding             | Genitourinary | --             | 106 (102, 111) | 391 (383, 398)  | 451 (443, 459)    | 476 (468, 484)    | 342 (334, 350)    | 166 (160, 172)    | 61 (57, 66)       | 14 (12, 17)       |
| Postmenopausal Bleeding         | Genitourinary | --             | --             | --              | 5 (4, 5)          | 127 (123, 131)    | 833 (821, 845)    | 1170 (1155, 1185) | 1051 (1034, 1069) | 687 (672, 703)    |
| Tubulo-interstitial Nephropathy | Genitourinary | 6 (5, 6)       | 32 (30, 33)    | 53 (51, 55)     | 38 (37, 40)       | 31 (30, 33)       | 28 (26, 29)       | 28 (26, 30)       | 35 (32, 37)       | 34 (31, 36)       |
| Undescended Testis              | Genitourinary | 251 (245, 257) | 195 (190, 201) | 126 (122, 130)  | 67 (64, 70)       | 50 (47, 52)       | 39 (37, 42)       | 28 (25, 30)       | 14 (12, 16)       | --                |
| Urinary Incontinence            | Genitourinary | 81 (79, 83)    | 117 (114, 120) | 96 (93, 99)     | 184 (181, 188)    | 388 (382, 393)    | 536 (529, 543)    | 673 (665, 681)    | 881 (869, 892)    | 1187 (1171, 1202) |
| Urolithiasis                    | Genitourinary | 3 (3, 4)       | 25 (23, 26)    | 94 (91, 96)     | 172 (169, 176)    | 270 (266, 274)    | 349 (344, 355)    | 437 (431, 444)    | 493 (484, 502)    | 454 (443, 465)    |
| Uterovaginal Prolapse           | Genitourinary | --             | --             | 40 (38, 42)     | 166 (161, 171)    | 400 (392, 407)    | 736 (725, 748)    | 1221 (1205, 1236) | 1531 (1510, 1552) | 1524 (1501, 1547) |
| Agranulocytosis                 | Haem/Imm      | 19 (18, 20)    | 25 (24, 26)    | 25 (23, 26)     | 33 (31, 34)       | 51 (49, 53)       | 85 (82, 87)       | 120 (116, 123)    | 128 (124, 133)    | 80 (76, 84)       |
| Anaemia – other                 | Haem/Imm      | 51 (49, 52)    | 108 (105, 111) | 216 (212, 220)  | 318 (314, 323)    | 431 (426, 437)    | 489 (482, 495)    | 649 (641, 657)    | 1271 (1257, 1285) | 2194 (2172, 2216) |
| Aplastic Anaemia                | Haem/Imm      | 2 (2, 3)       | 4 (3, 4)       | 3 (3, 4)        | 4 (4, 5)          | 6 (6, 7)          | 12 (11, 13)       | 21 (20, 23)       | 35 (33, 37)       | 46 (43, 50)       |
| Folate Deficiency Anaemia       | Haem/Imm      | --             | --             | 3 (2, 3)        | 5 (4, 6)          | 9 (8, 10)         | 14 (13, 15)       | 21 (20, 23)       | 43 (41, 46)       | 110 (105, 115)    |
| Hypersplenism                   | Haem/Imm      | 6 (5, 7)       | 8 (8, 9)       | 10 (9, 11)      | 11 (10, 12)       | 13 (12, 14)       | 17 (16, 19)       | 23 (22, 25)       | 27 (25, 29)       | 22 (19, 24)       |
| Hypoplenism                     | Haem/Imm      | --             | 2 (2, 3)       | 6 (6, 7)        | 9 (9, 10)         | 16 (15, 17)       | 22 (21, 23)       | 27 (25, 28)       | 30 (28, 32)       | 25 (23, 27)       |
| Immunodeficiency                | Haem/Imm      | 6 (6, 7)       | 8 (7, 9)       | 4 (4, 5)        | 3 (3, 4)          | 4 (4, 5)          | 5 (5, 6)          | 8 (7, 9)          | 10 (9, 11)        | 9 (8, 11)         |

|                                         |            |                   |                   |                |                |                |                |                   |                   |                   |
|-----------------------------------------|------------|-------------------|-------------------|----------------|----------------|----------------|----------------|-------------------|-------------------|-------------------|
| Iron Deficiency Anaemia                 | Haem/Imm   | 66 (64, 68)       | 149 (146, 153)    | 230 (226, 234) | 320 (315, 324) | 434 (429, 440) | 462 (456, 469) | 521 (514, 528)    | 925 (913, 937)    | 1441 (1424, 1459) |
| Other haemolytic anaemia                | Haem/Imm   | 10 (9, 11)        | 9 (8, 10)         | 11 (10, 12)    | 11 (10, 12)    | 10 (9, 11)     | 9 (8, 10)      | 12 (11, 13)       | 18 (16, 20)       | 22 (20, 24)       |
| Primary thrombocytopaenia               | Haem/Imm   | 8 (7, 9)          | 11 (10, 12)       | 11 (10, 12)    | 12 (11, 13)    | 13 (12, 14)    | 15 (14, 16)    | 20 (18, 21)       | 29 (27, 31)       | 37 (34, 40)       |
| Sarcoidosis                             | Haem/Imm   | --                | --                | 3 (3, 4)       | 12 (11, 13)    | 25 (24, 27)    | 36 (35, 38)    | 39 (37, 41)       | 38 (35, 40)       | 22 (20, 24)       |
| Secondary Polycythaemia                 | Haem/Imm   | --                | --                | 2 (2, 2)       | 4 (3, 4)       | 9 (8, 10)      | 16 (15, 17)    | 22 (20, 23)       | 24 (22, 26)       | 18 (16, 20)       |
| Secondary Thrombocytopaenia             | Haem/Imm   | 11 (10, 12)       | 13 (11, 14)       | 22 (21, 23)    | 29 (28, 31)    | 31 (30, 33)    | 44 (42, 46)    | 67 (64, 70)       | 107 (103, 111)    | 135 (130, 141)    |
| Sickle Cell Disease                     | Haem/Imm   | 5 (4, 6)          | 3 (2, 3)          | 3 (3, 3)       | 4 (3, 4)       | 3 (2, 3)       | --             | --                | --                | --                |
| Sickle Cell Trait                       | Haem/Imm   | 18 (17, 19)       | 12 (11, 13)       | 19 (18, 20)    | 25 (23, 26)    | 21 (20, 22)    | 10 (9, 11)     | 5 (4, 6)          | 6 (5, 7)          | --                |
| Thalassaemia                            | Haem/Imm   | 4 (3, 4)          | 4 (4, 5)          | 8 (7, 8)       | 8 (8, 9)       | 7 (6, 8)       | 5 (4, 6)       | 4 (4, 5)          | --                | --                |
| Thalassaemia Trait                      | Haem/Imm   | 6 (5, 7)          | 12 (11, 13)       | 20 (18, 21)    | 24 (23, 25)    | 17 (16, 18)    | 14 (12, 15)    | 9 (8, 10)         | 10 (9, 11)        | 6 (5, 7)          |
| Thrombophilia                           | Haem/Imm   | --                | 4 (4, 5)          | 12 (11, 13)    | 20 (19, 21)    | 19 (18, 20)    | 14 (13, 15)    | 13 (12, 14)       | 9 (8, 10)         | --                |
| Vitamin B12 deficiency anaemia          | Haem/Imm   | --                | 4 (3, 4)          | 12 (11, 13)    | 21 (19, 22)    | 32 (30, 33)    | 45 (43, 47)    | 71 (68, 73)       | 149 (144, 154)    | 271 (263, 278)    |
| Bacterial Infection                     | Infections | 487 (481, 492)    | 464 (457, 470)    | 602 (595, 608) | 716 (709, 724) | 796 (788, 803) | 857 (848, 865) | 1149 (1139, 1160) | 2045 (2027, 2063) | 3881 (3853, 3910) |
| Chronic Hepatitis                       | Infections | --                | 3 (3, 4)          | 19 (18, 20)    | 41 (39, 43)    | 46 (44, 48)    | 40 (38, 42)    | 22 (21, 24)       | 13 (12, 15)       | 7 (6, 8)          |
| Encephalitis                            | Infections | 2 (2, 2)          | 3 (2, 3)          | --             | --             | 2 (2, 3)       | --             | 4 (3, 4)          | 5 (4, 6)          | --                |
| Fungal Infection                        | Infections | 37 (36, 39)       | 30 (28, 32)       | 50 (48, 52)    | 49 (47, 51)    | 44 (43, 46)    | 59 (57, 62)    | 103 (99, 106)     | 175 (170, 180)    | 265 (257, 272)    |
| HIV                                     | Infections | --                | --                | 7 (6, 7)       | 18 (17, 19)    | 21 (20, 22)    | 12 (11, 13)    | 5 (4, 6)          | --                | --                |
| Infection – Anorectal                   | Infections | 5 (4, 6)          | 12 (11, 13)       | 35 (33, 36)    | 55 (53, 57)    | 57 (55, 59)    | 49 (47, 52)    | 37 (35, 39)       | 27 (25, 29)       | 17 (15, 19)       |
| Infection – Bone                        | Infections | 10 (9, 11)        | 13 (12, 14)       | 11 (10, 12)    | 14 (13, 15)    | 22 (21, 23)    | 32 (31, 34)    | 43 (41, 45)       | 71 (68, 74)       | 89 (85, 94)       |
| Infection – Digestive System            | Infections | 380 (374, 385)    | 219 (215, 224)    | 117 (114, 120) | 113 (110, 116) | 134 (131, 137) | 186 (182, 190) | 276 (271, 281)    | 483 (474, 491)    | 757 (744, 770)    |
| Infection – Ear/Upper Respiratory Tract | Infections | 1209 (1200, 1218) | 1010 (1001, 1019) | 354 (349, 358) | 197 (193, 201) | 154 (151, 158) | 132 (128, 135) | 132 (129, 136)    | 139 (135, 144)    | 146 (140, 151)    |
| Infection – Eye                         | Infections | 96 (94, 99)       | 34 (32, 36)       | 7 (6, 7)       | 7 (6, 7)       | 8 (7, 8)       | 10 (9, 11)     | 15 (14, 16)       | 34 (32, 37)       | 88 (84, 92)       |
| Infection – Heart                       | Infections | --                | --                | 3 (3, 4)       | 4 (4, 5)       | 5 (5, 6)       | 6 (5, 7)       | 9 (8, 10)         | 14 (13, 16)       | 14 (12, 16)       |
| Infection – Liver                       | Infections | --                | 4 (3, 4)          | 14 (13, 15)    | 30 (29, 32)    | 34 (33, 36)    | 32 (30, 33)    | 22 (21, 24)       | 21 (19, 22)       | 22 (19, 24)       |
| Infection – Lower Respiratory Tract     | Infections | 634 (627, 641)    | 295 (290, 300)    | 141 (138, 145) | 191 (188, 195) | 270 (266, 274) | 416 (410, 422) | 754 (746, 763)    | 1566 (1550, 1582) | 3207 (3180, 3234) |
| Infection – Male Genitourinary          | Infections | 42 (40, 44)       | 69 (66, 73)       | 60 (57, 63)    | 50 (48, 53)    | 59 (57, 62)    | 57 (54, 60)    | 69 (66, 73)       | 100 (94, 106)     | 105 (97, 113)     |
| Infection – Other Genitourinary         | Infections | 2 (2, 3)          | 16 (15, 17)       | 51 (49, 53)    | 47 (46, 49)    | 26 (25, 27)    | 15 (14, 16)    | 10 (9, 12)        | 12 (11, 14)       | 19 (17, 20)       |
| Infection – Other nervous system        | Infections | 3 (3, 4)          | 5 (5, 6)          | 5 (5, 6)       | 6 (5, 7)       | 8 (7, 9)       | 11 (10, 12)    | 18 (17, 20)       | 26 (24, 28)       | 35 (32, 37)       |
| Infection – Other organisms             | Infections | 1416 (1406, 1426) | 1166 (1156, 1176) | 494 (488, 500) | 399 (394, 405) | 456 (450, 462) | 600 (593, 607) | 948 (938, 958)    | 1706 (1689, 1722) | 2978 (2952, 3003) |
| Infection – Other organs                | Infections | 662 (655, 669)    | 345 (340, 351)    | 206 (203, 210) | 217 (213, 221) | 208 (204, 212) | 230 (226, 234) | 310 (305, 316)    | 477 (468, 486)    | 598 (586, 609)    |
| Infection – Skin                        | Infections | 170 (166, 173)    | 170 (166, 174)    | 192 (188, 196) | 216 (213, 220) | 237 (233, 241) | 270 (265, 275) | 343 (337, 349)    | 544 (535, 553)    | 966 (952, 981)    |
| Meningitis                              | Infections | 15 (14, 17)       | 13 (12, 14)       | 17 (15, 18)    | 15 (14, 16)    | 12 (11, 13)    | 8 (7, 9)       | 6 (5, 7)          | 6 (5, 7)          | --                |
| Parasitic Infection                     | Infections | 9 (8, 10)         | 18 (17, 19)       | 12 (11, 13)    | 10 (10, 11)    | 12 (11, 13)    | 12 (11, 13)    | 11 (10, 12)       | 12 (11, 14)       | 18 (16, 20)       |
| Pelvic Inflammatory Disease             | Infections | --                | 36 (34, 39)       | 176 (171, 181) | 328 (321, 335) | 386 (379, 393) | 248 (241, 254) | 136 (131, 141)    | 92 (87, 97)       | 52 (48, 56)       |
| Rheumatic Fever                         | Infections | --                | 3 (2, 3)          | 4 (3, 4)       | 8 (7, 8)       | 13 (12, 14)    | 33 (31, 34)    | 71 (69, 74)       | 134 (130, 139)    | 173 (167, 179)    |
| Septicaemia                             | Infections | 164 (161, 167)    | 39 (38, 41)       | 23 (22, 24)    | 31 (30, 33)    | 52 (50, 54)    | 89 (86, 91)    | 169 (165, 173)    | 331 (324, 338)    | 596 (584, 607)    |
| Tuberculosis                            | Infections | 6 (6, 7)          | 16 (15, 17)       | 30 (29, 32)    | 45 (43, 47)    | 45 (43, 47)    | 64 (61, 66)    | 107 (103, 110)    | 199 (193, 204)    | 213 (206, 220)    |
| Urinary Tract Infection                 | Infections | 132 (129, 135)    | 150 (146, 153)    | 161 (158, 164) | 156 (152, 159) | 185 (182, 189) | 257 (252, 262) | 479 (472, 486)    | 1186 (1173, 1200) | 2921 (2896, 2946) |
| Viral Infection                         | Infections | 1244 (1234, 1253) | 558 (551, 565)    | 204 (200, 208) | 178 (175, 182) | 150 (147, 154) | 132 (128, 135) | 136 (133, 140)    | 188 (183, 194)    | 301 (293, 309)    |

|                                      |                 |                |                |                |                   |                   |                   |                   |                   |                   |
|--------------------------------------|-----------------|----------------|----------------|----------------|-------------------|-------------------|-------------------|-------------------|-------------------|-------------------|
| Ankylosing Spondylosis               | Musculoskeletal | --             | --             | 8 (7, 9)       | 15 (14, 16)       | 22 (21, 24)       | 30 (28, 31)       | 38 (36, 40)       | 32 (30, 34)       | 29 (27, 32)       |
| Carpal Tunnel Syndrome               | Musculoskeletal | --             | 11 (10, 12)    | 76 (74, 79)    | 228 (224, 232)    | 427 (421, 432)    | 619 (612, 627)    | 719 (710, 727)    | 722 (711, 732)    | 759 (746, 771)    |
| Collapsed Vertebra                   | Musculoskeletal | --             | --             | 3 (3, 4)       | 5 (4, 5)          | 8 (8, 9)          | 19 (18, 21)       | 43 (41, 45)       | 103 (99, 107)     | 197 (191, 203)    |
| Enteropathic Arthropathy             | Musculoskeletal | --             | --             | --             | --                | --                | --                | --                | --                | --                |
| Enthesopathy                         | Musculoskeletal | 60 (58, 62)    | 300 (295, 306) | 582 (576, 589) | 1121 (1112, 1130) | 2260 (2248, 2273) | 3188 (3171, 3205) | 3517 (3498, 3536) | 3357 (3334, 3380) | 2796 (2771, 2821) |
| Fibromatosis                         | Musculoskeletal | --             | --             | 4 (3, 5)       | 12 (11, 13)       | 46 (44, 48)       | 141 (138, 145)    | 288 (283, 294)    | 378 (370, 386)    | 340 (331, 350)    |
| Fracture – Hip                       | Musculoskeletal | 3 (3, 4)       | 9 (8, 10)      | 13 (12, 13)    | 16 (15, 17)       | 24 (22, 25)       | 48 (46, 51)       | 110 (107, 113)    | 370 (363, 378)    | 1243 (1227, 1258) |
| Fracture – Wrist                     | Musculoskeletal | 123 (120, 126) | 393 (387, 399) | 312 (308, 317) | 226 (223, 230)    | 221 (217, 225)    | 266 (261, 271)    | 352 (346, 358)    | 533 (524, 542)    | 810 (798, 822)    |
| Giant Cell Arteritis                 | Musculoskeletal | --             | --             | --             | --                | 3 (2, 3)          | 10 (9, 11)        | 30 (28, 32)       | 77 (73, 80)       | 116 (112, 121)    |
| Gout                                 | Musculoskeletal | --             | 2 (2, 3)       | 22 (21, 24)    | 90 (88, 93)       | 213 (209, 217)    | 408 (402, 414)    | 643 (635, 651)    | 973 (960, 985)    | 1135 (1118, 1151) |
| Intervertebral Disc Disorder         | Musculoskeletal | --             | 12 (11, 13)    | 68 (66, 70)    | 211 (207, 215)    | 396 (391, 402)    | 509 (502, 516)    | 587 (579, 595)    | 640 (630, 650)    | 558 (547, 570)    |
| Juvenile Arthritis                   | Musculoskeletal | 7 (6, 7)       | 15 (14, 16)    | 11 (10, 12)    | 7 (7, 8)          | 5 (5, 6)          | 3 (3, 4)          | --                | --                | --                |
| Lupus Erythematosus                  | Musculoskeletal | --             | 3 (2, 3)       | 7 (6, 8)       | 13 (12, 14)       | 21 (20, 23)       | 26 (25, 28)       | 28 (27, 30)       | 26 (24, 28)       | 19 (17, 21)       |
| Osteoarthritis                       | Musculoskeletal | --             | 10 (9, 11)     | 50 (48, 52)    | 166 (162, 169)    | 586 (580, 593)    | 1561 (1549, 1572) | 2868 (2851, 2885) | 4188 (4163, 4214) | 4848 (4816, 4880) |
| Osteoporosis                         | Musculoskeletal | 2 (2, 2)       | 6 (5, 7)       | 11 (10, 12)    | 22 (21, 24)       | 61 (59, 63)       | 228 (224, 233)    | 569 (561, 576)    | 1153 (1140, 1166) | 1794 (1776, 1813) |
| Polymyalgia Rheumatica               | Musculoskeletal | --             | --             | --             | 2 (2, 3)          | 9 (8, 9)          | 40 (39, 42)       | 142 (138, 146)    | 402 (394, 410)    | 614 (603, 625)    |
| Psoriatic Arthritis                  | Musculoskeletal | --             | --             | 7 (7, 8)       | 19 (18, 20)       | 33 (31, 34)       | 43 (42, 45)       | 45 (43, 47)       | 38 (35, 40)       | 20 (18, 23)       |
| Reactive Arthritis                   | Musculoskeletal | 6 (6, 7)       | 6 (5, 7)       | 7 (6, 7)       | 11 (10, 11)       | 14 (13, 15)       | 16 (15, 17)       | 15 (14, 16)       | 10 (9, 11)        | 7 (6, 9)          |
| Rheumatoid Arthritis                 | Musculoskeletal | --             | 6 (5, 6)       | 17 (16, 18)    | 38 (36, 39)       | 80 (77, 82)       | 149 (146, 153)    | 240 (235, 245)    | 336 (328, 343)    | 370 (361, 378)    |
| Scleroderma                          | Musculoskeletal | --             | --             | --             | --                | 4 (3, 4)          | 7 (6, 8)          | 10 (9, 11)        | 11 (10, 12)       | 7 (6, 8)          |
| Scoliosis                            | Musculoskeletal | 13 (12, 14)    | 74 (72, 77)    | 64 (62, 66)    | 63 (61, 65)       | 59 (57, 61)       | 65 (63, 67)       | 91 (88, 94)       | 146 (142, 151)    | 228 (222, 235)    |
| Sjogren Syndrome                     | Musculoskeletal | --             | --             | --             | 4 (3, 4)          | 8 (7, 9)          | 16 (15, 17)       | 26 (24, 27)       | 30 (28, 32)       | 21 (19, 23)       |
| Spinal Stenosis                      | Musculoskeletal | --             | --             | 4 (3, 4)       | 14 (13, 15)       | 38 (36, 39)       | 83 (80, 85)       | 164 (160, 168)    | 301 (294, 308)    | 309 (300, 317)    |
| Spondylolisthesis                    | Musculoskeletal | --             | 3 (2, 3)       | 5 (4, 6)       | 13 (12, 14)       | 25 (24, 26)       | 44 (42, 46)       | 74 (71, 77)       | 107 (103, 111)    | 111 (107, 116)    |
| Spondylosis                          | Musculoskeletal | --             | 3 (2, 3)       | 17 (16, 18)    | 70 (68, 72)       | 230 (226, 234)    | 546 (539, 553)    | 1018 (1008, 1028) | 1521 (1506, 1537) | 1726 (1706, 1745) |
| Autonomic Neuropathy                 | Neurological    | 2 (2, 3)       | 7 (6, 7)       | 8 (8, 9)       | 13 (12, 14)       | 24 (22, 25)       | 34 (32, 35)       | 46 (44, 48)       | 62 (59, 65)       | 62 (58, 65)       |
| Bell's Palsy                         | Neurological    | 7 (6, 8)       | 27 (25, 28)    | 43 (41, 44)    | 62 (60, 64)       | 79 (77, 81)       | 100 (97, 103)     | 118 (114, 121)    | 144 (139, 148)    | 148 (142, 153)    |
| Cerebral Palsy                       | Neurological    | 22 (21, 24)    | 30 (28, 32)    | 22 (20, 23)    | 14 (13, 15)       | 14 (13, 15)       | 12 (11, 13)       | 10 (9, 11)        | 7 (6, 8)          | --                |
| Chronic Fatigue Syndrome             | Neurological    | 2 (2, 3)       | 34 (32, 35)    | 81 (79, 83)    | 139 (136, 143)    | 209 (206, 213)    | 263 (258, 268)    | 238 (233, 243)    | 187 (181, 192)    | 126 (121, 131)    |
| Diabetic Neuropathy                  | Neurological    | --             | --             | 2 (2, 2)       | 6 (6, 7)          | 18 (17, 20)       | 45 (43, 47)       | 84 (81, 87)       | 159 (154, 164)    | 154 (148, 160)    |
| Epilepsy                             | Neurological    | 61 (59, 63)    | 134 (130, 137) | 157 (154, 160) | 169 (166, 173)    | 198 (195, 202)    | 201 (197, 205)    | 212 (208, 217)    | 253 (246, 259)    | 287 (279, 295)    |
| Essential Tremor                     | Neurological    | --             | 7 (7, 8)       | 10 (10, 11)    | 10 (9, 10)        | 12 (11, 13)       | 19 (17, 20)       | 44 (42, 46)       | 93 (89, 97)       | 92 (88, 97)       |
| Idiopathic Intracranial Hypertension | Neurological    | --             | 6 (5, 7)       | 9 (9, 10)      | 8 (8, 9)          | 6 (5, 6)          | 5 (4, 5)          | 3 (2, 4)          | --                | --                |
| Migraine                             | Neurological    | 46 (44, 47)    | 500 (493, 506) | 830 (822, 837) | 906 (898, 914)    | 945 (937, 953)    | 895 (886, 903)    | 778 (769, 786)    | 590 (581, 600)    | 388 (379, 397)    |
| Motor Neurone Disease                | Neurological    | --             | --             | --             | --                | 2 (2, 3)          | 4 (4, 5)          | 10 (9, 11)        | 17 (15, 18)       | 14 (12, 16)       |
| Multiple Sclerosis                   | Neurological    | --             | --             | 8 (8, 9)       | 23 (22, 24)       | 38 (37, 40)       | 49 (47, 51)       | 51 (49, 53)       | 34 (32, 36)       | 19 (17, 21)       |
| Myasthenia Gravis                    | Neurological    | --             | --             | --             | 2 (2, 2)          | 3 (2, 3)          | 4 (4, 5)          | 9 (8, 9)          | 13 (12, 14)       | 14 (12, 16)       |
| Parkinson's Disease                  | Neurological    | --             | --             | --             | --                | 4 (4, 5)          | 18 (17, 20)       | 70 (67, 73)       | 214 (208, 220)    | 331 (322, 340)    |
| Peripheral Neuropathy                | Neurological    | 4 (4, 5)       | 17 (16, 19)    | 49 (47, 51)    | 110 (107, 113)    | 211 (208, 215)    | 326 (321, 331)    | 432 (425, 439)    | 529 (520, 539)    | 481 (470, 491)    |

|                                       |              |                |                   |                   |                   |                   |                   |                   |                   |                   |
|---------------------------------------|--------------|----------------|-------------------|-------------------|-------------------|-------------------|-------------------|-------------------|-------------------|-------------------|
| Trigeminal Neuralgia                  | Neurological | --             | --                | 10 (9, 10)        | 25 (24, 26)       | 51 (49, 53)       | 80 (78, 83)       | 108 (104, 111)    | 137 (132, 141)    | 151 (145, 156)    |
| Congenital Septal Defect              | Perinatal    | 85 (83, 88)    | 59 (57, 61)       | 38 (36, 40)       | 30 (29, 32)       | 27 (25, 28)       | 24 (22, 25)       | 22 (21, 24)       | 23 (21, 25)       | 17 (15, 19)       |
| Down Syndrome                         | Perinatal    | 11 (10, 12)    | 9 (8, 10)         | 8 (7, 8)          | 7 (6, 8)          | 10 (9, 11)        | 8 (7, 9)          | 5 (4, 5)          | --                | --                |
| High Birth Weight                     | Perinatal    | 86 (84, 89)    | 8 (7, 8)          | --                | --                | --                | --                | --                | --                | --                |
| Intrauterine Hypoxia                  | Perinatal    | 346 (341, 351) | 90 (87, 92)       | 4 (3, 4)          | --                | --                | --                | --                | --                | --                |
| Low Birth Weight                      | Perinatal    | 441 (435, 447) | 79 (76, 81)       | 6 (5, 7)          | 2 (2, 3)          | --                | --                | --                | --                | --                |
| Neonatal Jaundice                     | Perinatal    | 690 (683, 697) | 142 (139, 146)    | 16 (15, 17)       | 11 (10, 12)       | 2 (2, 2)          | --                | --                | --                | --                |
| Patent Ductus Arteriosus              | Perinatal    | 50 (48, 52)    | 18 (17, 19)       | 9 (8, 10)         | 4 (4, 5)          | 4 (3, 4)          | 3 (3, 4)          | 3 (2, 3)          | --                | --                |
| Post-term Delivery                    | Perinatal    | 71 (69, 73)    | 8 (8, 9)          | --                | --                | --                | --                | --                | --                | --                |
| Premature Delivery                    | Perinatal    | 356 (351, 361) | 168 (164, 172)    | 64 (62, 66)       | 26 (25, 27)       | 12 (11, 13)       | 4 (3, 4)          | --                | --                | --                |
| Respiratory Distress of the Newborn   | Perinatal    | 298 (293, 302) | 70 (68, 73)       | 16 (15, 17)       | 7 (6, 8)          | --                | --                | --                | --                | --                |
| Sepsis of the Newborn                 | Perinatal    | 134 (131, 137) | 14 (13, 15)       | --                | --                | --                | --                | --                | --                | --                |
| Spina Bifida                          | Perinatal    | 4 (4, 5)       | 6 (5, 7)          | 10 (9, 10)        | 15 (14, 16)       | 18 (16, 19)       | 16 (15, 17)       | 14 (12, 15)       | 10 (9, 12)        | 6 (5, 7)          |
| Alcohol Misuse                        | Psychiatric  | --             | 74 (72, 77)       | 254 (250, 259)    | 330 (326, 335)    | 436 (431, 441)    | 467 (461, 474)    | 434 (428, 441)    | 300 (293, 307)    | 180 (173, 186)    |
| Anxiety                               | Psychiatric  | 46 (45, 48)    | 525 (518, 532)    | 1167 (1158, 1176) | 1472 (1462, 1482) | 1704 (1694, 1715) | 1773 (1761, 1786) | 1744 (1730, 1757) | 1607 (1591, 1622) | 1434 (1417, 1451) |
| Autism                                | Psychiatric  | 108 (105, 111) | 157 (154, 161)    | 41 (40, 43)       | 15 (14, 16)       | 12 (11, 13)       | 8 (7, 8)          | 4 (3, 4)          | --                | --                |
| Bipolar Affective Disorder            | Psychiatric  | --             | 11 (10, 12)       | 38 (37, 40)       | 56 (54, 58)       | 66 (64, 68)       | 62 (60, 64)       | 59 (56, 61)       | 58 (55, 61)       | 44 (41, 47)       |
| Delirium                              | Psychiatric  | --             | 3 (3, 4)          | 4 (3, 4)          | 4 (4, 5)          | 8 (7, 8)          | 17 (16, 18)       | 47 (45, 49)       | 192 (187, 198)    | 610 (599, 622)    |
| Dementia                              | Psychiatric  | --             | --                | --                | --                | 6 (5, 7)          | 27 (25, 28)       | 130 (126, 134)    | 737 (726, 748)    | 2451 (2429, 2474) |
| Depression                            | Psychiatric  | 3 (2, 3)       | 486 (479, 492)    | 1505 (1495, 1515) | 2049 (2037, 2061) | 2492 (2479, 2505) | 2510 (2496, 2525) | 2277 (2262, 2293) | 2031 (2013, 2048) | 2019 (1999, 2039) |
| Eating Disorders                      | Psychiatric  | --             | 33 (31, 34)       | 60 (58, 62)       | 70 (68, 72)       | 50 (48, 52)       | 28 (26, 29)       | 12 (11, 14)       | 5 (4, 6)          | --                |
| Hyperkinetic Disorders                | Psychiatric  | 55 (53, 57)    | 168 (164, 172)    | 59 (57, 61)       | 10 (9, 11)        | 5 (5, 6)          | 3 (3, 4)          | --                | --                | --                |
| Intellectual Disability               | Psychiatric  | 42 (41, 44)    | 110 (107, 114)    | 89 (86, 91)       | 61 (59, 63)       | 70 (68, 72)       | 66 (63, 68)       | 53 (50, 55)       | 37 (35, 39)       | 20 (18, 22)       |
| Obsessive Compulsive Disorder         | Psychiatric  | 4 (4, 5)       | 41 (39, 42)       | 65 (63, 67)       | 66 (63, 68)       | 58 (56, 60)       | 47 (45, 49)       | 35 (33, 37)       | 26 (24, 28)       | 22 (20, 24)       |
| Personality Disorder                  | Psychiatric  | --             | 30 (29, 32)       | 69 (67, 71)       | 85 (83, 88)       | 95 (92, 97)       | 81 (78, 83)       | 72 (69, 75)       | 56 (54, 59)       | 48 (45, 51)       |
| Schizophrenia                         | Psychiatric  | --             | 19 (18, 20)       | 67 (65, 69)       | 92 (89, 94)       | 102 (100, 105)    | 97 (95, 100)      | 91 (88, 94)       | 102 (98, 106)     | 114 (109, 118)    |
| Substance Misuse                      | Psychiatric  | 2 (2, 3)       | 90 (87, 93)       | 274 (270, 279)    | 329 (324, 334)    | 225 (221, 229)    | 128 (124, 131)    | 95 (92, 98)       | 90 (86, 93)       | 79 (75, 83)       |
| Allergic/chronic Rhinitis             | Respiratory  | 639 (633, 646) | 1705 (1692, 1717) | 1730 (1719, 1741) | 1719 (1708, 1730) | 1602 (1591, 1612) | 1517 (1506, 1529) | 1492 (1480, 1504) | 1477 (1462, 1492) | 1299 (1282, 1316) |
| Asbestosis                            | Respiratory  | --             | --                | --                | --                | --                | 4 (4, 5)          | 25 (24, 27)       | 60 (57, 64)       | 63 (59, 68)       |
| Aspiration Pneumonitis                | Respiratory  | 5 (4, 6)       | 5 (4, 6)          | 6 (6, 7)          | 8 (7, 9)          | 13 (12, 14)       | 22 (21, 24)       | 49 (47, 51)       | 121 (116, 125)    | 341 (332, 350)    |
| Asthma                                | Respiratory  | 798 (790, 805) | 2040 (2026, 2053) | 1970 (1959, 1982) | 1562 (1552, 1573) | 1408 (1398, 1418) | 1333 (1322, 1344) | 1362 (1351, 1374) | 1536 (1521, 1552) | 1427 (1410, 1445) |
| Bronchiectasis                        | Respiratory  | 4 (3, 4)       | 6 (5, 7)          | 7 (6, 7)          | 11 (10, 12)       | 21 (20, 22)       | 52 (49, 54)       | 128 (125, 132)    | 210 (204, 216)    | 208 (201, 215)    |
| Chronic Obstructive Pulmonary Disease | Respiratory  | 4 (4, 5)       | 8 (7, 9)          | 12 (11, 13)       | 33 (31, 34)       | 127 (124, 130)    | 374 (368, 379)    | 826 (817, 835)    | 1360 (1346, 1375) | 1574 (1555, 1593) |
| Chronic Sinusitis                     | Respiratory  | 8 (7, 9)       | 45 (43, 47)       | 110 (108, 113)    | 185 (182, 189)    | 285 (280, 289)    | 371 (365, 376)    | 393 (387, 399)    | 328 (321, 335)    | 216 (210, 223)    |
| Hypertrophic Nasal Turbinates         | Respiratory  | 8 (7, 8)       | 33 (31, 34)       | 48 (46, 50)       | 49 (47, 51)       | 49 (47, 51)       | 44 (42, 46)       | 35 (34, 37)       | 22 (21, 24)       | 10 (9, 12)        |
| Nasal Polyps                          | Respiratory  | 7 (6, 8)       | 26 (25, 28)       | 44 (42, 46)       | 68 (66, 71)       | 104 (101, 106)    | 148 (144, 152)    | 205 (201, 210)    | 238 (232, 244)    | 217 (210, 225)    |
| Pleural Effusion                      | Respiratory  | 13 (12, 14)    | 15 (14, 16)       | 23 (22, 24)       | 36 (35, 38)       | 64 (62, 66)       | 123 (119, 126)    | 250 (245, 255)    | 538 (529, 548)    | 1017 (1002, 1033) |
| Pleural Plaque                        | Respiratory  | --             | --                | --                | --                | --                | 9 (8, 9)          | 42 (40, 45)       | 102 (98, 106)     | 126 (121, 132)    |



|                       |             |                   |                   |                   |                   |                   |                   |                   |                   |                   |
|-----------------------|-------------|-------------------|-------------------|-------------------|-------------------|-------------------|-------------------|-------------------|-------------------|-------------------|
| Pneumothorax          | Respiratory | 10 (9, 11)        | 17 (16, 18)       | 35 (33, 36)       | 43 (41, 44)       | 49 (47, 51)       | 59 (56, 61)       | 75 (72, 78)       | 88 (84, 91)       | 86 (81, 90)       |
| Pulmonary Collapse    | Respiratory | 13 (12, 14)       | 10 (9, 11)        | 11 (10, 12)       | 16 (15, 17)       | 28 (27, 30)       | 56 (54, 58)       | 101 (98, 104)     | 170 (165, 176)    | 234 (226, 241)    |
| Pulmonary Fibrosis    | Respiratory | --                | --                | --                | 2 (2, 2)          | 6 (5, 7)          | 16 (14, 17)       | 45 (43, 47)       | 123 (119, 128)    | 174 (168, 181)    |
| Respiratory Failure   | Respiratory | 7 (6, 7)          | 6 (6, 7)          | 10 (9, 10)        | 14 (13, 15)       | 29 (28, 31)       | 64 (61, 66)       | 147 (143, 150)    | 289 (282, 296)    | 436 (427, 446)    |
| Sleep apnoea          | Respiratory | 84 (82, 87)       | 46 (44, 48)       | 26 (25, 27)       | 59 (57, 61)       | 122 (119, 124)    | 178 (174, 182)    | 185 (181, 190)    | 123 (118, 127)    | 48 (44, 51)       |
| Acne                  | Skin        | 47 (45, 49)       | 1720 (1707, 1732) | 1820 (1809, 1831) | 1190 (1181, 1200) | 633 (626, 639)    | 332 (326, 337)    | 153 (149, 157)    | 87 (83, 91)       | 49 (46, 53)       |
| Actinic keratosis     | Skin        | --                | --                | 3 (3, 4)          | 18 (17, 19)       | 78 (76, 80)       | 239 (235, 244)    | 586 (578, 594)    | 1035 (1022, 1048) | 1337 (1319, 1355) |
| Alopecia Areata       | Skin        | 10 (9, 11)        | 34 (32, 36)       | 43 (42, 45)       | 49 (47, 51)       | 49 (47, 51)       | 46 (44, 48)       | 38 (36, 40)       | 32 (29, 34)       | 22 (20, 24)       |
| Dermatitis            | Skin        | 3312 (3296, 3327) | 3283 (3266, 3300) | 2278 (2266, 2291) | 2010 (1999, 2022) | 2136 (2124, 2148) | 2290 (2276, 2305) | 2480 (2464, 2496) | 2789 (2768, 2810) | 2907 (2881, 2932) |
| Hidradenitis          | Skin        | --                | 15 (13, 16)       | 36 (34, 37)       | 47 (45, 49)       | 48 (46, 49)       | 37 (35, 39)       | 20 (19, 22)       | 8 (7, 9)          | --                |
| Lichen Planus         | Skin        | --                | 6 (5, 7)          | 14 (13, 15)       | 30 (29, 32)       | 52 (50, 54)       | 94 (91, 97)       | 133 (130, 137)    | 149 (144, 154)    | 123 (118, 128)    |
| Pilonidal cyst/sinus  | Skin        | 19 (17, 20)       | 51 (49, 54)       | 134 (131, 137)    | 154 (151, 158)    | 120 (118, 123)    | 89 (86, 92)       | 71 (69, 74)       | 51 (48, 54)       | 32 (29, 34)       |
| Psoriasis             | Skin        | 25 (24, 26)       | 147 (143, 150)    | 272 (268, 277)    | 341 (336, 346)    | 409 (404, 414)    | 464 (458, 470)    | 521 (513, 528)    | 540 (531, 549)    | 447 (438, 457)    |
| Rosacea               | Skin        | 2 (2, 2)          | 79 (76, 81)       | 148 (145, 152)    | 207 (203, 210)    | 312 (307, 317)    | 388 (383, 394)    | 417 (411, 423)    | 394 (386, 402)    | 321 (313, 330)    |
| Seborrheic Dermatitis | Skin        | 474 (468, 480)    | 499 (492, 505)    | 405 (400, 411)    | 391 (386, 396)    | 440 (435, 446)    | 504 (497, 511)    | 579 (572, 587)    | 688 (678, 699)    | 683 (670, 695)    |
| Urticaria             | Skin        | 514 (508, 520)    | 724 (716, 732)    | 521 (515, 527)    | 439 (433, 445)    | 489 (483, 494)    | 509 (503, 516)    | 517 (509, 524)    | 520 (511, 529)    | 427 (418, 437)    |
| Vitiligo              | Skin        | 15 (14, 16)       | 34 (32, 36)       | 38 (36, 39)       | 37 (35, 38)       | 41 (39, 43)       | 42 (40, 44)       | 43 (41, 45)       | 37 (34, 39)       | 28 (26, 31)       |

--Small numbers: to protect patient confidentiality, where prevalence counts were <100, period prevalence estimates have been replaced with "--".

**Supplementary Table S5.** Age-standardised period prevalence per 10000 (95% confidence intervals) from 1 April 2010 to 31 Mar 2015 for 308 medical conditions, stratified by sex.

| Condition                                          | Category       | Female (Age-standardised) | Male (Age-standardised) | Both Sexes (Age and sex-standardised) |
|----------------------------------------------------|----------------|---------------------------|-------------------------|---------------------------------------|
| Benign Neoplasm – Brain                            | Benign Neo     | 31 (30, 32)               | 20 (19, 21)             | 25 (25, 26)                           |
| Benign Neoplasm – Colon                            | Benign Neo     | 249 (246, 251)            | 330 (327, 333)          | 289 (287, 291)                        |
| Benign Neoplasm – Ovary                            | Benign Neo     | 383 (380, 386)            | --                      | 383 (380, 386)                        |
| Benign Neoplasm – Stomach                          | Benign Neo     | 65 (63, 66)               | 47 (46, 48)             | 56 (55, 56)                           |
| Benign Neoplasm – Uterus                           | Benign Neo     | 181 (179, 183)            | --                      | 181 (179, 183)                        |
| Cervical Intra-epithelial Neoplasia                | Benign Neo     | 241 (239, 243)            | --                      | 241 (239, 243)                        |
| Haemangioma                                        | Benign Neo     | 149 (147, 150)            | 106 (105, 108)          | 127 (126, 129)                        |
| Leiomyoma                                          | Benign Neo     | 401 (398, 404)            | --                      | 401 (398, 404)                        |
| Hodgkins Lymphoma                                  | Cancers        | 6 (6, 7)                  | 8 (8, 8)                | 7 (7, 7)                              |
| Leukaemia                                          | Cancers        | 18 (17, 19)               | 27 (27, 28)             | 23 (22, 23)                           |
| Monoclonal Gammopathy of Undetermined Significance | Cancers        | 11 (11, 12)               | 14 (13, 14)             | 12 (12, 13)                           |
| Myelodysplastic Syndrome                           | Cancers        | 10 (9, 10)                | 13 (13, 14)             | 11 (11, 12)                           |
| Non Hodgkins Lymphoma                              | Cancers        | 25 (25, 26)               | 34 (33, 35)             | 30 (29, 30)                           |
| Plasma Cell Malignancy                             | Cancers        | 8 (8, 9)                  | 13 (12, 13)             | 10 (10, 11)                           |
| Polycythaemia vera                                 | Cancers        | 7 (7, 8)                  | 15 (15, 16)             | 11 (11, 12)                           |
| Primary Malignancy – Biliary                       | Cancers        | 4 (3, 4)                  | 4 (4, 5)                | 4 (4, 4)                              |
| Primary Malignancy – Bladder                       | Cancers        | 20 (19, 21)               | 73 (72, 74)             | 46 (46, 47)                           |
| Primary Malignancy – Bone                          | Cancers        | 3 (3, 4)                  | 4 (4, 5)                | 4 (4, 4)                              |
| Primary Malignancy – Bowel                         | Cancers        | 67 (66, 68)               | 93 (91, 94)             | 80 (79, 81)                           |
| Primary Malignancy – Brain                         | Cancers        | 9 (8, 9)                  | 10 (10, 11)             | 10 (9, 10)                            |
| Primary Malignancy – Breast                        | Cancers        | 274 (272, 277)            | 3 (2, 3)                | 139 (137, 140)                        |
| Primary Malignancy – Cervix                        | Cancers        | 19 (19, 20)               | --                      | 19 (19, 20)                           |
| Primary Malignancy – Kidney                        | Cancers        | 12 (12, 13)               | 23 (22, 24)             | 17 (17, 18)                           |
| Primary Malignancy – Liver                         | Cancers        | 3 (2, 3)                  | 6 (6, 6)                | 4 (4, 5)                              |
| Primary Malignancy – Lung                          | Cancers        | 38 (37, 39)               | 53 (51, 54)             | 45 (44, 46)                           |
| Primary Malignancy – Melanoma                      | Cancers        | 57 (56, 58)               | 47 (46, 48)             | 52 (51, 53)                           |
| Primary Malignancy – Mesothelioma                  | Cancers        | 1 (1, 1)                  | 5 (5, 6)                | 3 (3, 3)                              |
| Primary Malignancy – Multiple Sites                | Cancers        | 1 (1, 1)                  | 2 (2, 2)                | 2 (1, 2)                              |
| Primary Malignancy – Oesophageal                   | Cancers        | 7 (7, 8)                  | 19 (18, 19)             | 13 (13, 13)                           |
| Primary Malignancy – Oropharyngeal                 | Cancers        | 12 (12, 13)               | 21 (21, 22)             | 17 (16, 17)                           |
| Primary Malignancy – other                         | Cancers        | 31 (30, 32)               | 36 (35, 37)             | 33 (33, 34)                           |
| Primary Malignancy – Ovary                         | Cancers        | 29 (28, 30)               | --                      | 29 (28, 30)                           |
| Primary Malignancy – Pancreas                      | Cancers        | 9 (9, 10)                 | 11 (10, 11)             | 10 (10, 10)                           |
| Primary Malignancy – Prostate                      | Cancers        | --                        | 209 (207, 212)          | 209 (207, 212)                        |
| Primary Malignancy – Skin                          | Cancers        | 272 (270, 275)            | 351 (348, 354)          | 312 (310, 314)                        |
| Primary Malignancy – Stomach                       | Cancers        | 7 (6, 7)                  | 15 (15, 16)             | 11 (11, 11)                           |
| Primary Malignancy – Testis                        | Cancers        | --                        | 16 (16, 17)             | 16 (16, 17)                           |
| Primary Malignancy – Thyroid                       | Cancers        | 10 (9, 10)                | 3 (3, 4)                | 7 (6, 7)                              |
| Primary Malignancy – Uterus                        | Cancers        | 37 (36, 38)               | --                      | 37 (36, 38)                           |
| Secondary Malignancy – Adrenal                     | Cancers        | 4 (4, 4)                  | 6 (5, 6)                | 5 (5, 5)                              |
| Secondary Malignancy – Bone                        | Cancers        | 28 (27, 29)               | 44 (43, 45)             | 36 (35, 37)                           |
| Secondary Malignancy – Bowel                       | Cancers        | 4 (3, 4)                  | 2 (2, 3)                | 3 (3, 3)                              |
| Secondary Malignancy – Brain                       | Cancers        | 11 (11, 12)               | 11 (11, 12)             | 11 (11, 12)                           |
| Secondary Malignancy – Liver                       | Cancers        | 37 (36, 38)               | 43 (42, 44)             | 40 (39, 41)                           |
| Secondary Malignancy – Lung                        | Cancers        | 26 (25, 27)               | 29 (28, 30)             | 28 (27, 28)                           |
| Secondary Malignancy – Lymph Nodes                 | Cancers        | 79 (78, 81)               | 50 (48, 51)             | 65 (64, 65)                           |
| Secondary Malignancy – other                       | Cancers        | 18 (17, 19)               | 18 (17, 19)             | 18 (18, 18)                           |
| Secondary Malignancy – Peritoneum                  | Cancers        | 19 (18, 20)               | 11 (10, 11)             | 15 (14, 15)                           |
| Secondary Malignancy – Pleura                      | Cancers        | 8 (8, 8)                  | 6 (6, 7)                | 7 (7, 7)                              |
| Abdominal Aortic Aneurysm                          | Cardiovascular | 21 (20, 22)               | 88 (86, 89)             | 54 (54, 55)                           |
| Atrial Fibrillation                                | Cardiovascular | 349 (347, 352)            | 516 (513, 520)          | 433 (431, 435)                        |
| Atrioventricular Block, first degree               | Cardiovascular | 22 (21, 23)               | 49 (47, 50)             | 35 (35, 36)                           |
| Atrioventricular Block, second degree              | Cardiovascular | 9 (9, 9)                  | 17 (17, 18)             | 13 (13, 14)                           |
| Atrioventricular Block, third degree               | Cardiovascular | 14 (13, 14)               | 27 (26, 28)             | 20 (20, 21)                           |
| Bifascicular Block                                 | Cardiovascular | 2 (1, 2)                  | 6 (5, 6)                | 4 (3, 4)                              |
| Cardiomyopathy – other                             | Cardiovascular | 16 (16, 17)               | 37 (36, 38)             | 26 (26, 27)                           |
| Coronary Heart Disease (not otherwise specified)   | Cardiovascular | 89 (88, 91)               | 124 (122, 126)          | 107 (106, 108)                        |
| Dilated cardiomyopathy                             | Cardiovascular | 8 (7, 8)                  | 21 (21, 22)             | 15 (14, 15)                           |
| Heart Failure                                      | Cardiovascular | 228 (226, 230)            | 327 (324, 330)          | 278 (276, 279)                        |
| Hypertension                                       | Cardiovascular | 2000 (1994, 2007)         | 2125 (2118, 2132)       | 2063 (2058, 2068)                     |
| Hypertrophic cardiomyopathy                        | Cardiovascular | 4 (4, 5)                  | 7 (7, 7)                | 6 (5, 6)                              |
| Intracerebral Haemorrhage                          | Cardiovascular | 27 (26, 28)               | 36 (35, 37)             | 31 (31, 32)                           |

|                                            |                |                   |                   |                   |
|--------------------------------------------|----------------|-------------------|-------------------|-------------------|
| Ischaemic Stroke                           | Cardiovascular | 116 (114, 117)    | 153 (151, 155)    | 134 (133, 135)    |
| Left Bundle Branch Block                   | Cardiovascular | 46 (45, 47)       | 65 (64, 66)       | 55 (55, 56)       |
| Multiple valve disorder                    | Cardiovascular | 53 (52, 54)       | 62 (61, 64)       | 58 (57, 58)       |
| Myocardial Infarction                      | Cardiovascular | 180 (178, 182)    | 419 (416, 422)    | 299 (297, 301)    |
| Non-rheumatic Aortic valve disorder        | Cardiovascular | 84 (83, 85)       | 113 (111, 115)    | 99 (97, 100)      |
| Non-rheumatic Mitral valve disorder        | Cardiovascular | 85 (83, 86)       | 84 (82, 85)       | 84 (83, 85)       |
| Pericardial Effusion                       | Cardiovascular | 15 (15, 16)       | 18 (17, 18)       | 16 (16, 17)       |
| Peripheral Arterial Disease                | Cardiovascular | 115 (113, 116)    | 210 (207, 212)    | 162 (161, 164)    |
| Primary Pulmonary Hypertension             | Cardiovascular | 19 (19, 20)       | 19 (18, 19)       | 19 (19, 19)       |
| Pulmonary Embolism                         | Cardiovascular | 103 (102, 105)    | 96 (94, 97)       | 100 (98, 101)     |
| Raynauds Disease                           | Cardiovascular | 138 (136, 140)    | 66 (65, 67)       | 102 (101, 103)    |
| Rheumatic Valve Disorder                   | Cardiovascular | 24 (23, 25)       | 19 (18, 20)       | 22 (21, 22)       |
| Right Bundle Branch Block                  | Cardiovascular | 34 (33, 35)       | 76 (74, 77)       | 55 (54, 56)       |
| Secondary Pulmonary Hypertension           | Cardiovascular | 12 (11, 12)       | 11 (10, 11)       | 11 (11, 12)       |
| Sick Sinus Syndrome                        | Cardiovascular | 12 (11, 12)       | 14 (14, 15)       | 13 (12, 13)       |
| Stable Angina                              | Cardiovascular | 348 (345, 350)    | 561 (558, 565)    | 455 (452, 457)    |
| Stroke – not otherwise specified           | Cardiovascular | 103 (101, 104)    | 122 (120, 124)    | 112 (111, 113)    |
| Subarachnoid Haemorrhage                   | Cardiovascular | 22 (22, 23)       | 19 (18, 20)       | 21 (20, 21)       |
| Subdural haematoma                         | Cardiovascular | 8 (7, 8)          | 16 (15, 17)       | 12 (12, 12)       |
| Supraventricular Tachycardia               | Cardiovascular | 83 (82, 84)       | 68 (66, 69)       | 75 (74, 76)       |
| Transient Ischaemic Attack                 | Cardiovascular | 167 (165, 169)    | 213 (210, 215)    | 190 (188, 191)    |
| Trifascicular Block                        | Cardiovascular | 2 (1, 2)          | 8 (7, 8)          | 5 (4, 5)          |
| Unstable Angina                            | Cardiovascular | 112 (111, 114)    | 206 (204, 209)    | 159 (158, 161)    |
| Venous thrombolism (Excl PE)               | Cardiovascular | 163 (161, 165)    | 144 (142, 146)    | 153 (152, 155)    |
| Ventricular Tachycardia                    | Cardiovascular | 12 (12, 13)       | 29 (28, 29)       | 20 (20, 21)       |
| Abdominal Hernia                           | Digestive      | 339 (337, 342)    | 1175 (1170, 1180) | 757 (754, 760)    |
| Alcoholic Liver Disease                    | Digestive      | 20 (20, 21)       | 47 (46, 48)       | 33 (33, 34)       |
| Anal Fissure                               | Digestive      | 258 (256, 260)    | 218 (216, 220)    | 238 (236, 239)    |
| Angiodysplasia of colon                    | Digestive      | 8 (7, 8)          | 9 (9, 10)         | 8 (8, 9)          |
| Anorectal Fistula                          | Digestive      | 33 (32, 34)       | 58 (57, 59)       | 46 (45, 46)       |
| Anorectal Prolapse                         | Digestive      | 47 (46, 48)       | 19 (18, 19)       | 33 (32, 33)       |
| Appendicitis                               | Digestive      | 605 (601, 609)    | 521 (518, 525)    | 563 (561, 566)    |
| Autoimmune liver disease                   | Digestive      | 11 (10, 11)       | 3 (3, 4)          | 7 (7, 7)          |
| Barrett's Oesophagus                       | Digestive      | 36 (35, 37)       | 71 (69, 72)       | 53 (53, 54)       |
| Cholangitis                                | Digestive      | 18 (17, 18)       | 20 (19, 21)       | 19 (18, 19)       |
| Cholecystitis                              | Digestive      | 235 (233, 238)    | 108 (107, 110)    | 172 (170, 173)    |
| Cholelithiasis                             | Digestive      | 472 (469, 475)    | 216 (214, 218)    | 344 (342, 346)    |
| Cirrhosis                                  | Digestive      | 26 (25, 26)       | 42 (41, 43)       | 34 (33, 35)       |
| Coeliac Disease                            | Digestive      | 44 (43, 45)       | 24 (23, 25)       | 34 (34, 35)       |
| Crohns Disease                             | Digestive      | 44 (43, 45)       | 38 (37, 39)       | 41 (41, 42)       |
| Diaphragmatic Hernia                       | Digestive      | 526 (523, 530)    | 470 (466, 473)    | 498 (496, 500)    |
| Diverticular Disease                       | Digestive      | 494 (491, 498)    | 429 (426, 433)    | 462 (459, 464)    |
| Fatty Liver                                | Digestive      | 35 (34, 36)       | 45 (44, 46)       | 40 (39, 40)       |
| Gastritis                                  | Digestive      | 650 (646, 653)    | 648 (644, 651)    | 649 (646, 651)    |
| Gastro-oesophageal Reflux Disease          | Digestive      | 995 (991, 1000)   | 888 (884, 892)    | 942 (938, 945)    |
| Irritable Bowel Syndrome                   | Digestive      | 876 (871, 880)    | 338 (336, 341)    | 607 (604, 610)    |
| Liver Failure                              | Digestive      | 12 (11, 12)       | 17 (16, 18)       | 14 (14, 15)       |
| Oesophageal Ulcer                          | Digestive      | 570 (566, 573)    | 601 (598, 605)    | 585 (583, 588)    |
| Oesophageal Varices                        | Digestive      | 10 (9, 10)        | 17 (16, 18)       | 13 (13, 14)       |
| Pancreatitis                               | Digestive      | 59 (58, 60)       | 61 (60, 63)       | 60 (59, 61)       |
| Peptic Ulcer                               | Digestive      | 189 (187, 191)    | 305 (302, 307)    | 247 (245, 249)    |
| Peritonitis                                | Digestive      | 61 (59, 62)       | 71 (70, 72)       | 66 (65, 67)       |
| Portal Hypertension                        | Digestive      | 9 (9, 10)         | 15 (15, 16)       | 12 (12, 13)       |
| Ulcerative Colitis                         | Digestive      | 65 (64, 66)       | 67 (66, 68)       | 66 (65, 67)       |
| Volvulus                                   | Digestive      | 13 (12, 13)       | 12 (11, 12)       | 12 (12, 13)       |
| Deafness                                   | Ear            | 811 (807, 815)    | 961 (956, 966)    | 886 (883, 889)    |
| Meniere's Disease                          | Ear            | 45 (44, 46)       | 29 (28, 30)       | 37 (36, 38)       |
| Tinnitus                                   | Ear            | 313 (310, 315)    | 331 (328, 334)    | 322 (320, 324)    |
| Cystic Fibrosis                            | Endocrine      | 7 (6, 7)          | 2 (2, 3)          | 5 (4, 5)          |
| Diabetes Mellitus – other or not specified | Endocrine      | 34 (33, 35)       | 36 (35, 37)       | 35 (34, 36)       |
| Hyperparathyroidism                        | Endocrine      | 30 (29, 31)       | 13 (13, 14)       | 22 (21, 22)       |
| Low HDL-C                                  | Endocrine      | 635 (632, 639)    | 711 (707, 715)    | 673 (670, 676)    |
| Obesity                                    | Endocrine      | 1945 (1939, 1952) | 1439 (1433, 1445) | 1692 (1688, 1696) |
| Polycystic Ovarian Syndrome                | Endocrine      | 90 (89, 91)       | --                | 90 (89, 91)       |
| Raised LDL-C                               | Endocrine      | 1595 (1589, 1601) | 1468 (1462, 1474) | 1531 (1527, 1536) |
| Raised Total Cholesterol                   | Endocrine      | 2530 (2523, 2538) | 2266 (2259, 2273) | 2398 (2393, 2403) |
| Raised Triglycerides                       | Endocrine      | 954 (949, 959)    | 1291 (1286, 1297) | 1123 (1119, 1126) |

|                                                |               |                   |                |                   |
|------------------------------------------------|---------------|-------------------|----------------|-------------------|
| Syndrome of Inappropriate AntiDiuretic Hormone | Endocrine     | 6 (6, 6)          | 5 (5, 6)       | 6 (5, 6)          |
| Thyroid Disease                                | Endocrine     | 809 (805, 814)    | 227 (224, 229) | 518 (516, 521)    |
| Type 1 Diabetes Mellitus                       | Endocrine     | 36 (35, 37)       | 49 (48, 50)    | 42 (42, 43)       |
| Type 2 Diabetes Mellitus                       | Endocrine     | 506 (503, 509)    | 693 (689, 698) | 600 (597, 602)    |
| Anterior Uveitis                               | Eye           | 71 (70, 72)       | 72 (70, 73)    | 71 (70, 72)       |
| Blindness                                      | Eye           | 121 (120, 123)    | 119 (118, 121) | 120 (119, 121)    |
| Cataract                                       | Eye           | 722 (718, 725)    | 625 (621, 629) | 673 (671, 676)    |
| Diabetic Eye Disease                           | Eye           | 167 (165, 169)    | 239 (236, 241) | 203 (201, 205)    |
| Glaucoma                                       | Eye           | 176 (174, 178)    | 189 (187, 191) | 182 (181, 184)    |
| Keratitis                                      | Eye           | 56 (54, 57)       | 47 (46, 48)    | 51 (51, 52)       |
| Macular Degeneration                           | Eye           | 160 (158, 162)    | 129 (127, 131) | 144 (143, 146)    |
| Posterior Uveitis                              | Eye           | 6 (6, 6)          | 5 (5, 6)       | 6 (5, 6)          |
| Ptoisis                                        | Eye           | 43 (42, 44)       | 35 (34, 36)    | 39 (39, 40)       |
| Retinal Detachment                             | Eye           | 50 (49, 51)       | 66 (64, 67)    | 58 (57, 58)       |
| Retinal Vascular Occlusion                     | Eye           | 38 (37, 39)       | 46 (45, 48)    | 42 (41, 43)       |
| Scleritis                                      | Eye           | 56 (55, 57)       | 35 (35, 36)    | 46 (45, 46)       |
| Acute Kidney Injury                            | Genitourinary | 165 (163, 167)    | 236 (233, 238) | 200 (199, 202)    |
| Benign Prostatic Hyperplasia                   | Genitourinary | --                | 769 (765, 774) | 769 (765, 774)    |
| Chronic Cystitis                               | Genitourinary | 27 (26, 27)       | 15 (14, 15)    | 21 (20, 21)       |
| Chronic Kidney Disease                         | Genitourinary | 462 (458, 465)    | 393 (390, 397) | 427 (425, 430)    |
| Dysmenorrhoea                                  | Genitourinary | 597 (594, 601)    | --             | 597 (594, 601)    |
| End Stage Renal Disease                        | Genitourinary | 23 (22, 23)       | 35 (34, 36)    | 29 (28, 29)       |
| Endometrial Hyperplasia                        | Genitourinary | 72 (70, 73)       | --             | 72 (70, 73)       |
| Endometriosis                                  | Genitourinary | 228 (226, 230)    | --             | 228 (226, 230)    |
| Erectile Dysfunction                           | Genitourinary | --                | 916 (911, 920) | 916 (911, 920)    |
| Female Infertility                             | Genitourinary | 252 (249, 254)    | --             | 252 (249, 254)    |
| Glomerulonephritis                             | Genitourinary | 59 (58, 60)       | 79 (77, 80)    | 69 (68, 70)       |
| Hydrocele                                      | Genitourinary | --                | 204 (202, 206) | 204 (202, 206)    |
| Male infertility                               | Genitourinary | --                | 62 (61, 63)    | 62 (61, 63)       |
| Menorrhagia                                    | Genitourinary | 1377 (1372, 1382) | --             | 1377 (1372, 1382) |
| Neuropathic Bladder                            | Genitourinary | 123 (122, 125)    | 76 (74, 77)    | 100 (99, 101)     |
| Obstructive and reflux uropathy                | Genitourinary | 73 (71, 74)       | 102 (100, 103) | 87 (86, 88)       |
| Postcoital Bleeding                            | Genitourinary | 258 (255, 260)    | --             | 258 (255, 260)    |
| Postmenopausal Bleeding                        | Genitourinary | 395 (392, 398)    | --             | 395 (392, 398)    |
| Tubulo-interstitial Nephropathy                | Genitourinary | 51 (50, 52)       | 13 (12, 13)    | 32 (31, 32)       |
| Undescended Testis                             | Genitourinary | --                | 89 (88, 90)    | 89 (88, 90)       |
| Urinary Incontinence                           | Genitourinary | 663 (659, 666)    | 138 (136, 140) | 400 (398, 403)    |
| Urolithiasis                                   | Genitourinary | 154 (153, 156)    | 326 (323, 328) | 240 (238, 242)    |
| Uterovaginal Prolapse                          | Genitourinary | 537 (534, 541)    | --             | 537 (534, 541)    |
| Agranulocytosis                                | Haem/Imm      | 69 (67, 70)       | 51 (50, 52)    | 60 (59, 61)       |
| Anaemia – other                                | Haem/Imm      | 652 (649, 656)    | 370 (367, 373) | 511 (509, 514)    |
| Aplastic Anaemia                               | Haem/Imm      | 11 (10, 11)       | 13 (13, 14)    | 12 (12, 12)       |
| Folate Deficiency Anaemia                      | Haem/Imm      | 17 (17, 18)       | 15 (14, 16)    | 16 (16, 17)       |
| Hypersplenism                                  | Haem/Imm      | 11 (11, 12)       | 18 (17, 18)    | 15 (14, 15)       |
| Hyposplenism                                   | Haem/Imm      | 12 (12, 13)       | 17 (17, 18)    | 15 (14, 15)       |
| Immunodeficiency                               | Haem/Imm      | 6 (6, 6)          | 6 (6, 6)       | 6 (6, 6)          |
| Iron Deficiency Anaemia                        | Haem/Imm      | 614 (610, 617)    | 252 (249, 254) | 433 (430, 435)    |
| Other haemolytic anaemia                       | Haem/Imm      | 13 (12, 13)       | 11 (10, 11)    | 12 (11, 12)       |
| Primary thrombocytopaenia                      | Haem/Imm      | 16 (16, 17)       | 15 (14, 15)    | 15 (15, 16)       |
| Sarcoidosis                                    | Haem/Imm      | 20 (19, 20)       | 20 (19, 20)    | 20 (19, 20)       |
| Secondary Polycythaemia                        | Haem/Imm      | 7 (6, 7)          | 13 (13, 14)    | 10 (9, 10)        |
| Secondary Thrombocytopaenia                    | Haem/Imm      | 41 (40, 42)       | 46 (45, 47)    | 44 (43, 44)       |
| Sickle Cell Disease                            | Haem/Imm      | 3 (3, 3)          | 2 (2, 3)       | 3 (3, 3)          |
| Sickle Cell Trait                              | Haem/Imm      | 19 (19, 20)       | 10 (9, 10)     | 14 (14, 15)       |
| Thalassaemia                                   | Haem/Imm      | 7 (7, 7)          | 4 (4, 4)       | 5 (5, 6)          |
| Thalassaemia Trait                             | Haem/Imm      | 17 (16, 18)       | 11 (10, 11)    | 14 (14, 14)       |
| Thrombophilia                                  | Haem/Imm      | 18 (17, 18)       | 6 (6, 6)       | 12 (11, 12)       |
| Vitamin B12 deficiency anaemia                 | Haem/Imm      | 63 (62, 64)       | 38 (37, 39)    | 50 (50, 51)       |
| Bacterial Infection                            | Infections    | 1104 (1099, 1109) | 913 (908, 917) | 1008 (1005, 1012) |
| Chronic Hepatitis                              | Infections    | 19 (19, 20)       | 29 (28, 30)    | 24 (24, 25)       |
| Encephalitis                                   | Infections    | 3 (2, 3)          | 3 (2, 3)       | 3 (2, 3)          |
| Fungal Infection                               | Infections    | 87 (85, 88)       | 63 (62, 64)    | 75 (74, 76)       |
| HIV                                            | Infections    | 6 (6, 7)          | 11 (11, 12)    | 9 (9, 9)          |
| Infection – Anorectal                          | Infections    | 27 (26, 27)       | 45 (44, 45)    | 36 (35, 36)       |
| Infection – Bone                               | Infections    | 21 (20, 22)       | 37 (36, 38)    | 29 (28, 30)       |
| Infection – Digestive System                   | Infections    | 265 (263, 268)    | 235 (233, 237) | 250 (249, 252)    |
| Infection – Ear/Upper Respiratory Tract        | Infections    | 371 (369, 374)    | 392 (389, 394) | 382 (380, 383)    |
| Infection – Eye                                | Infections    | 25 (25, 26)       | 29 (28, 30)    | 27 (27, 28)       |
| Infection – Heart                              | Infections    | 3 (3, 4)          | 8 (7, 8)       | 6 (5, 6)          |
| Infection – Liver                              | Infections    | 16 (15, 16)       | 26 (25, 27)    | 21 (20, 21)       |

|                                      |                 |                   |                   |                   |
|--------------------------------------|-----------------|-------------------|-------------------|-------------------|
| Infection – Lower Respiratory Tract  | Infections      | 581 (578, 585)    | 666 (663, 670)    | 624 (621, 626)    |
| Infection – Male Genitourinary       | Infections      | --                | 64 (63, 65)       | 64 (63, 65)       |
| Infection – Other Genitourinary      | Infections      | 45 (44, 46)       | 1 (1, 2)          | 23 (23, 24)       |
| Infection – Other nervous system     | Infections      | 11 (10, 11)       | 12 (11, 12)       | 11 (11, 11)       |
| Infection – Other organisms          | Infections      | 917 (913, 921)    | 976 (971, 980)    | 946 (943, 949)    |
| Infection – Other organs             | Infections      | 341 (339, 344)    | 319 (317, 322)    | 330 (328, 332)    |
| Infection – Skin                     | Infections      | 268 (266, 271)    | 322 (319, 325)    | 295 (293, 297)    |
| Meningitis                           | Infections      | 12 (11, 12)       | 11 (10, 11)       | 11 (11, 12)       |
| Parasitic Infection                  | Infections      | 13 (12, 13)       | 12 (11, 12)       | 12 (12, 13)       |
| Pelvic Inflammatory Disease          | Infections      | 183 (181, 185)    | --                | 183 (181, 185)    |
| Rheumatic Fever                      | Infections      | 42 (41, 43)       | 33 (32, 34)       | 37 (37, 38)       |
| Septicaemia                          | Infections      | 114 (113, 116)    | 139 (138, 141)    | 127 (126, 128)    |
| Tuberculosis                         | Infections      | 70 (68, 71)       | 66 (65, 67)       | 68 (67, 69)       |
| Urinary Tract Infection              | Infections      | 526 (523, 529)    | 353 (350, 356)    | 439 (437, 441)    |
| Viral Infection                      | Infections      | 332 (330, 335)    | 322 (319, 324)    | 327 (325, 329)    |
| Ankylosing Spondylosis               | Musculoskeletal | 11 (11, 12)       | 27 (26, 27)       | 19 (19, 19)       |
| Carpal Tunnel Syndrome               | Musculoskeletal | 504 (501, 507)    | 236 (234, 239)    | 370 (368, 372)    |
| Collapsed Vertebra                   | Musculoskeletal | 36 (35, 37)       | 23 (22, 23)       | 29 (29, 30)       |
| Enteropathic Arthropathy             | Musculoskeletal | 1 (1, 2)          | 1 (1, 1)          | 1 (1, 1)          |
| Enthesopathy                         | Musculoskeletal | 1871 (1864, 1877) | 1837 (1830, 1843) | 1854 (1849, 1858) |
| Fibromatosis                         | Musculoskeletal | 70 (69, 71)       | 154 (152, 156)    | 112 (111, 113)    |
| Fracture – Hip                       | Musculoskeletal | 157 (155, 158)    | 89 (88, 91)       | 123 (122, 124)    |
| Fracture – Wrist                     | Musculoskeletal | 363 (360, 365)    | 277 (275, 280)    | 320 (318, 322)    |
| Giant Cell Arteritis                 | Musculoskeletal | 24 (24, 25)       | 12 (11, 12)       | 18 (18, 18)       |
| Gout                                 | Musculoskeletal | 133 (131, 135)    | 504 (500, 507)    | 318 (316, 320)    |
| Intervertebral Disc Disorder         | Musculoskeletal | 314 (312, 317)    | 316 (313, 319)    | 315 (313, 317)    |
| Juvenile Arthritis                   | Musculoskeletal | 8 (7, 8)          | 5 (4, 5)          | 6 (6, 7)          |
| Lupus Erythematosus                  | Musculoskeletal | 26 (25, 27)       | 6 (6, 6)          | 16 (16, 16)       |
| Osteoarthritis                       | Musculoskeletal | 1445 (1439, 1450) | 1099 (1093, 1104) | 1272 (1268, 1275) |
| Osteoporosis                         | Musculoskeletal | 494 (490, 497)    | 113 (111, 115)    | 303 (302, 305)    |
| Polymyalgia Rheumatica               | Musculoskeletal | 115 (113, 117)    | 66 (64, 67)       | 90 (89, 91)       |
| Psoriatic Arthritis                  | Musculoskeletal | 23 (23, 24)       | 24 (23, 25)       | 24 (23, 24)       |
| Reactive Arthritis                   | Musculoskeletal | 9 (8, 9)          | 12 (12, 13)       | 11 (10, 11)       |
| Rheumatoid Arthritis                 | Musculoskeletal | 156 (154, 158)    | 75 (74, 76)       | 115 (114, 117)    |
| Scleroderma                          | Musculoskeletal | 7 (7, 7)          | 2 (2, 2)          | 4 (4, 5)          |
| Scoliosis                            | Musculoskeletal | 103 (102, 104)    | 52 (51, 54)       | 78 (77, 79)       |
| Sjogren Syndrome                     | Musculoskeletal | 19 (18, 19)       | 3 (2, 3)          | 11 (10, 11)       |
| Spinal Stenosis                      | Musculoskeletal | 79 (77, 80)       | 82 (80, 83)       | 80 (79, 81)       |
| Spondylolisthesis                    | Musculoskeletal | 42 (41, 43)       | 30 (29, 31)       | 36 (35, 36)       |
| Spondylosis                          | Musculoskeletal | 514 (510, 517)    | 402 (399, 405)    | 458 (456, 460)    |
| Autonomic Neuropathy                 | Neurological    | 27 (26, 28)       | 24 (23, 25)       | 26 (25, 26)       |
| Bell's Palsy                         | Neurological    | 75 (74, 77)       | 76 (74, 77)       | 76 (75, 76)       |
| Cerebral Palsy                       | Neurological    | 14 (13, 14)       | 18 (17, 18)       | 16 (15, 16)       |
| Chronic Fatigue Syndrome             | Neurological    | 218 (216, 220)    | 78 (76, 79)       | 148 (146, 149)    |
| Diabetic Neuropathy                  | Neurological    | 30 (30, 31)       | 52 (51, 54)       | 41 (41, 42)       |
| Epilepsy                             | Neurological    | 174 (172, 176)    | 184 (182, 186)    | 179 (178, 181)    |
| Essential Tremor                     | Neurological    | 24 (23, 25)       | 27 (26, 28)       | 26 (25, 26)       |
| Idiopathic Intracranial Hypertension | Neurological    | 8 (8, 8)          | 2 (2, 2)          | 5 (5, 5)          |
| Migraine                             | Neurological    | 1008 (1004, 1013) | 385 (382, 388)    | 697 (694, 699)    |
| Motor Neurone Disease                | Neurological    | 3 (3, 4)          | 6 (5, 6)          | 5 (4, 5)          |
| Multiple Sclerosis                   | Neurological    | 36 (35, 37)       | 16 (15, 17)       | 26 (26, 27)       |
| Myasthenia Gravis                    | Neurological    | 4 (4, 5)          | 4 (4, 5)          | 4 (4, 4)          |
| Parkinson's Disease                  | Neurological    | 35 (34, 36)       | 59 (58, 60)       | 47 (46, 48)       |
| Peripheral Neuropathy                | Neurological    | 205 (203, 207)    | 231 (229, 233)    | 218 (216, 220)    |
| Trigeminal Neuralgia                 | Neurological    | 73 (72, 74)       | 37 (36, 38)       | 55 (54, 56)       |
| Congenital Septal Defect             | Perinatal       | 39 (38, 40)       | 34 (34, 35)       | 37 (36, 37)       |
| Down Syndrome                        | Perinatal       | 7 (7, 7)          | 7 (7, 7)          | 7 (7, 7)          |
| High Birth Weight                    | Perinatal       | 7 (7, 7)          | 13 (13, 13)       | 10 (10, 10)       |
| Intrauterine Hypoxia                 | Perinatal       | 43 (43, 44)       | 50 (49, 51)       | 47 (46, 47)       |
| Low Birth Weight                     | Perinatal       | 58 (57, 59)       | 54 (53, 55)       | 56 (56, 57)       |
| Neonatal Jaundice                    | Perinatal       | 80 (79, 81)       | 104 (102, 105)    | 92 (91, 93)       |
| Patent Ductus Arteriosus             | Perinatal       | 11 (11, 12)       | 10 (9, 10)        | 10 (10, 11)       |
| Post-term Delivery                   | Perinatal       | 8 (8, 9)          | 9 (8, 9)          | 8 (8, 9)          |
| Premature Delivery                   | Perinatal       | 63 (62, 64)       | 76 (75, 77)       | 69 (69, 70)       |
| Respiratory Distress of the Newborn  | Perinatal       | 33 (32, 34)       | 51 (50, 52)       | 42 (41, 43)       |
| Sepsis of the Newborn                | Perinatal       | 13 (13, 14)       | 18 (18, 19)       | 16 (15, 16)       |
| Spina Bifida                         | Perinatal       | 13 (12, 13)       | 11 (10, 11)       | 12 (11, 12)       |
| Alcohol Misuse                       | Psychiatric     | 189 (187, 191)    | 398 (395, 400)    | 293 (292, 295)    |
| Anxiety                              | Psychiatric     | 1662 (1657, 1668) | 930 (926, 934)    | 1296 (1293, 1300) |
| Autism                               | Psychiatric     | 16 (16, 17)       | 62 (61, 63)       | 39 (38, 40)       |

|                                       |             |                   |                   |                   |
|---------------------------------------|-------------|-------------------|-------------------|-------------------|
| Bipolar Affective Disorder            | Psychiatric | 53 (52, 54)       | 37 (36, 38)       | 45 (44, 46)       |
| Delirium                              | Psychiatric | 57 (56, 58)       | 59 (58, 60)       | 58 (57, 59)       |
| Dementia                              | Psychiatric | 230 (228, 232)    | 187 (185, 189)    | 209 (207, 210)    |
| Depression                            | Psychiatric | 2209 (2203, 2216) | 1279 (1274, 1284) | 1744 (1740, 1749) |
| Eating Disorders                      | Psychiatric | 63 (62, 64)       | 4 (4, 4)          | 33 (33, 34)       |
| Hyperkinetic Disorders                | Psychiatric | 13 (12, 13)       | 56 (55, 57)       | 34 (34, 35)       |
| Intellectual Disability               | Psychiatric | 53 (52, 54)       | 76 (75, 78)       | 64 (64, 65)       |
| Obsessive Compulsive Disorder         | Psychiatric | 51 (50, 52)       | 36 (36, 37)       | 44 (43, 44)       |
| Personality Disorder                  | Psychiatric | 63 (62, 64)       | 63 (62, 64)       | 63 (62, 64)       |
| Schizophrenia                         | Psychiatric | 67 (66, 68)       | 84 (82, 85)       | 75 (75, 76)       |
| Substance Misuse                      | Psychiatric | 114 (112, 115)    | 205 (203, 207)    | 159 (158, 161)    |
| Allergic/chronic Rhinitis             | Respiratory | 1537 (1531, 1542) | 1449 (1444, 1455) | 1493 (1489, 1497) |
| Asbestosis                            | Respiratory | 1 (1, 1)          | 23 (23, 24)       | 12 (12, 13)       |
| Aspiration Pneumonitis                | Respiratory | 32 (31, 32)       | 51 (50, 52)       | 41 (41, 42)       |
| Asthma                                | Respiratory | 1565 (1560, 1571) | 1432 (1427, 1438) | 1499 (1495, 1503) |
| Bronchiectasis                        | Respiratory | 59 (58, 61)       | 55 (54, 56)       | 57 (56, 58)       |
| Chronic Obstructive Pulmonary Disease | Respiratory | 332 (329, 334)    | 411 (408, 415)    | 371 (369, 374)    |
| Chronic Sinusitis                     | Respiratory | 272 (270, 275)    | 167 (165, 169)    | 219 (218, 221)    |
| Hypertrophic Nasal Turbinates         | Respiratory | 28 (27, 29)       | 44 (43, 45)       | 36 (36, 37)       |
| Nasal Polyps                          | Respiratory | 78 (77, 79)       | 139 (137, 141)    | 109 (107, 110)    |
| Pleural Effusion                      | Respiratory | 144 (142, 145)    | 185 (183, 187)    | 164 (163, 166)    |
| Pleural Plaque                        | Respiratory | 4 (4, 4)          | 40 (39, 41)       | 22 (21, 22)       |
| Pneumothorax                          | Respiratory | 28 (27, 29)       | 69 (67, 70)       | 48 (48, 49)       |
| Pulmonary Collapse                    | Respiratory | 51 (50, 52)       | 61 (60, 62)       | 56 (55, 57)       |
| Pulmonary Fibrosis                    | Respiratory | 21 (20, 22)       | 36 (35, 37)       | 28 (28, 29)       |
| Respiratory Failure                   | Respiratory | 75 (74, 76)       | 89 (87, 90)       | 82 (81, 83)       |
| Sleep apnoea                          | Respiratory | 55 (54, 56)       | 146 (144, 148)    | 101 (100, 102)    |
| Acne                                  | Skin        | 858 (854, 862)    | 611 (608, 615)    | 734 (732, 737)    |
| Actinic keratosis                     | Skin        | 215 (212, 217)    | 332 (329, 335)    | 273 (272, 275)    |
| Alopecia Areata                       | Skin        | 43 (42, 43)       | 33 (33, 34)       | 38 (37, 39)       |
| Dermatitis                            | Skin        | 2779 (2771, 2786) | 2308 (2301, 2315) | 2543 (2538, 2548) |
| Hidradenitis                          | Skin        | 40 (39, 41)       | 15 (14, 15)       | 27 (27, 28)       |
| Lichen Planus                         | Skin        | 71 (70, 72)       | 52 (51, 53)       | 62 (61, 62)       |
| Pilonidal cyst/sinus                  | Skin        | 55 (54, 56)       | 120 (119, 122)    | 88 (87, 89)       |
| Psoriasis                             | Skin        | 353 (350, 356)    | 343 (341, 346)    | 348 (346, 350)    |
| Rosacea                               | Skin        | 297 (294, 299)    | 203 (201, 206)    | 250 (249, 252)    |
| Seborrheic Dermatitis                 | Skin        | 516 (513, 519)    | 481 (478, 484)    | 498 (496, 501)    |
| Urticaria                             | Skin        | 637 (633, 640)    | 403 (401, 406)    | 520 (518, 522)    |
| Vitiligo                              | Skin        | 39 (38, 39)       | 33 (32, 34)       | 36 (35, 36)       |

--Small numbers: to protect patient confidentiality, where prevalence counts were <100, period prevalence estimates have been replaced with "--".

**Supplementary Table S6.** Age and sex-standardised period prevalence per 10000 (95% confidence intervals) from 1 April 2010 to 31 Mar 2015 for 308 medical conditions, stratified by ethnicity.

| Condition                                          | Category       | Asian             | Black             | White             |
|----------------------------------------------------|----------------|-------------------|-------------------|-------------------|
| Benign Neoplasm – Brain                            | Benign Neo     | 31 (28, 35)       | 33 (28, 38)       | 29 (28, 30)       |
| Benign Neoplasm – Colon                            | Benign Neo     | 246 (234, 257)    | 234 (219, 250)    | 346 (344, 349)    |
| Benign Neoplasm – Ovary                            | Benign Neo     | 286 (273, 298)    | 335 (319, 351)    | 444 (440, 447)    |
| Benign Neoplasm – Stomach                          | Benign Neo     | 58 (52, 64)       | 56 (48, 63)       | 66 (65, 67)       |
| Benign Neoplasm – Uterus                           | Benign Neo     | 196 (183, 208)    | 205 (190, 219)    | 208 (205, 210)    |
| Cervical Intra-epithelial Neoplasia                | Benign Neo     | 74 (68, 80)       | 181 (169, 192)    | 284 (281, 287)    |
| Haemangioma                                        | Benign Neo     | 74 (70, 79)       | 37 (33, 41)       | 146 (144, 147)    |
| Leiomyoma                                          | Benign Neo     | 473 (455, 491)    | 1210 (1178, 1242) | 409 (405, 412)    |
| Hodgkins Lymphoma                                  | Cancers        | --                | --                | 9 (8, 9)          |
| Leukaemia                                          | Cancers        | 17 (15, 20)       | --                | 26 (26, 27)       |
| Monoclonal Gammopathy of Undetermined Significance | Cancers        | --                | 35 (29, 42)       | 14 (13, 14)       |
| Myelodysplastic Syndrome                           | Cancers        | --                | --                | 13 (12, 13)       |
| Non Hodgkins Lymphoma                              | Cancers        | 30 (26, 34)       | 28 (23, 32)       | 35 (34, 36)       |
| Plasma Cell Malignancy                             | Cancers        | --                | --                | 12 (11, 12)       |
| Polycythaemia vera                                 | Cancers        | --                | --                | 14 (13, 14)       |
| Primary Malignancy – Biliary                       | Cancers        | --                | --                | 5 (4, 5)          |
| Primary Malignancy – Bladder                       | Cancers        | 19 (15, 22)       | --                | 54 (53, 55)       |
| Primary Malignancy – Bone                          | Cancers        | --                | --                | 5 (4, 5)          |
| Primary Malignancy – Bowel                         | Cancers        | 44 (39, 50)       | 60 (52, 69)       | 92 (91, 94)       |
| Primary Malignancy – Brain                         | Cancers        | --                | --                | 12 (12, 12)       |
| Primary Malignancy – Breast                        | Cancers        | 98 (91, 106)      | 92 (84, 101)      | 159 (158, 161)    |
| Primary Malignancy – Cervix                        | Cancers        | --                | --                | 22 (22, 23)       |
| Primary Malignancy – Kidney                        | Cancers        | --                | --                | 21 (20, 21)       |
| Primary Malignancy – Liver                         | Cancers        | --                | --                | 5 (5, 5)          |
| Primary Malignancy – Lung                          | Cancers        | 21 (17, 25)       | --                | 53 (52, 54)       |
| Primary Malignancy – Melanoma                      | Cancers        | --                | --                | 61 (60, 62)       |
| Primary Malignancy – Mesothelioma                  | Cancers        | --                | --                | 4 (3, 4)          |
| Primary Malignancy – Multiple Sites                | Cancers        | --                | --                | 2 (2, 2)          |
| Primary Malignancy – Oesophageal                   | Cancers        | --                | --                | 15 (15, 16)       |
| Primary Malignancy – Oropharyngeal                 | Cancers        | --                | --                | 20 (20, 21)       |
| Primary Malignancy – other                         | Cancers        | 24 (21, 28)       | 28 (23, 32)       | 39 (38, 40)       |
| Primary Malignancy – Ovary                         | Cancers        | --                | --                | 33 (32, 34)       |
| Primary Malignancy – Pancreas                      | Cancers        | --                | --                | 11 (11, 12)       |
| Primary Malignancy – Prostate                      | Cancers        | 111 (97, 125)     | 418 (383, 453)    | 233 (230, 236)    |
| Primary Malignancy – Skin                          | Cancers        | 20 (17, 24)       | --                | 351 (349, 353)    |
| Primary Malignancy – Stomach                       | Cancers        | --                | --                | 13 (12, 13)       |
| Primary Malignancy – Testis                        | Cancers        | --                | --                | 22 (21, 23)       |
| Primary Malignancy – Thyroid                       | Cancers        | --                | --                | 8 (7, 8)          |
| Primary Malignancy – Uterus                        | Cancers        | 35 (28, 42)       | --                | 42 (41, 43)       |
| Secondary Malignancy – Adrenal                     | Cancers        | --                | --                | 6 (5, 6)          |
| Secondary Malignancy – Bone                        | Cancers        | 19 (16, 23)       | 45 (37, 52)       | 42 (41, 43)       |
| Secondary Malignancy – Bowel                       | Cancers        | --                | --                | 4 (3, 4)          |
| Secondary Malignancy – Brain                       | Cancers        | --                | --                | 14 (13, 14)       |
| Secondary Malignancy – Liver                       | Cancers        | 21 (17, 24)       | 41 (34, 47)       | 47 (46, 48)       |
| Secondary Malignancy – Lung                        | Cancers        | 15 (12, 18)       | 33 (27, 39)       | 33 (32, 33)       |
| Secondary Malignancy – Lymph Nodes                 | Cancers        | 38 (33, 42)       | 44 (38, 50)       | 79 (78, 80)       |
| Secondary Malignancy – other                       | Cancers        | --                | --                | 21 (20, 21)       |
| Secondary Malignancy – Peritoneum                  | Cancers        | --                | --                | 18 (17, 18)       |
| Secondary Malignancy – Pleura                      | Cancers        | --                | --                | 8 (8, 9)          |
| Abdominal Aortic Aneurysm                          | Cardiovascular | --                | --                | 62 (61, 63)       |
| Atrial Fibrillation                                | Cardiovascular | 262 (248, 276)    | 236 (219, 254)    | 489 (486, 492)    |
| Atrioventricular Block, first degree               | Cardiovascular | 35 (30, 41)       | --                | 39 (39, 40)       |
| Atrioventricular Block, second degree              | Cardiovascular | --                | --                | 15 (15, 15)       |
| Atrioventricular Block, third degree               | Cardiovascular | 22 (18, 26)       | --                | 23 (22, 23)       |
| Bifascicular Block                                 | Cardiovascular | --                | --                | 4 (4, 4)          |
| Cardiomyopathy – other                             | Cardiovascular | 32 (28, 37)       | 45 (39, 51)       | 31 (30, 32)       |
| Coronary Heart Disease (not otherwise specified)   | Cardiovascular | 153 (142, 163)    | 109 (98, 121)     | 118 (117, 120)    |
| Dilated cardiomyopathy                             | Cardiovascular | --                | 25 (21, 29)       | 18 (17, 18)       |
| Heart Failure                                      | Cardiovascular | 359 (342, 376)    | 274 (256, 293)    | 309 (307, 311)    |
| Hypertension                                       | Cardiovascular | 2546 (2508, 2584) | 2871 (2823, 2920) | 2185 (2179, 2191) |
| Hypertrophic cardiomyopathy                        | Cardiovascular | --                | --                | 6 (6, 7)          |
| Intracerebral Haemorrhage                          | Cardiovascular | 35 (30, 40)       | 50 (43, 57)       | 35 (35, 36)       |
| Ischaemic Stroke                                   | Cardiovascular | 150 (140, 161)    | 169 (155, 183)    | 150 (149, 152)    |
| Left Bundle Branch Block                           | Cardiovascular | 68 (61, 75)       | 46 (38, 54)       | 62 (61, 63)       |
| Multiple valve disorder                            | Cardiovascular | 68 (61, 75)       | 54 (46, 62)       | 65 (64, 66)       |

|                                                |                |                   |                   |                   |
|------------------------------------------------|----------------|-------------------|-------------------|-------------------|
| Myocardial Infarction                          | Cardiovascular | 478 (460, 497)    | 212 (196, 228)    | 341 (339, 343)    |
| Non-rheumatic Aortic valve disorder            | Cardiovascular | 94 (86, 102)      | 73 (64, 82)       | 111 (109, 112)    |
| Non-rheumatic Mitral valve disorder            | Cardiovascular | 91 (83, 98)       | 63 (56, 71)       | 94 (93, 95)       |
| Pericardial Effusion                           | Cardiovascular | 21 (18, 24)       | 29 (24, 33)       | 19 (19, 20)       |
| Peripheral Arterial Disease                    | Cardiovascular | 147 (136, 157)    | 144 (130, 158)    | 184 (183, 186)    |
| Primary Pulmonary Hypertension                 | Cardiovascular | 25 (21, 29)       | 36 (30, 41)       | 21 (21, 22)       |
| Pulmonary Embolism                             | Cardiovascular | 45 (40, 50)       | 100 (91, 109)     | 118 (117, 119)    |
| Raynauds Disease                               | Cardiovascular | 88 (82, 94)       | 57 (52, 63)       | 114 (113, 116)    |
| Rheumatic Valve Disorder                       | Cardiovascular | 26 (23, 30)       | 25 (21, 30)       | 24 (24, 25)       |
| Right Bundle Branch Block                      | Cardiovascular | 73 (66, 80)       | 53 (45, 61)       | 62 (61, 63)       |
| Secondary Pulmonary Hypertension               | Cardiovascular | --                | --                | 13 (12, 13)       |
| Sick Sinus Syndrome                            | Cardiovascular | --                | --                | 14 (14, 15)       |
| Stable Angina                                  | Cardiovascular | 704 (682, 726)    | 321 (301, 340)    | 511 (508, 514)    |
| Stroke – not otherwise specified               | Cardiovascular | 108 (99, 117)     | 134 (121, 147)    | 123 (121, 124)    |
| Subarachnoid Haemorrhage                       | Cardiovascular | 14 (11, 16)       | 23 (19, 27)       | 25 (24, 25)       |
| Subdural haematoma                             | Cardiovascular | --                | --                | 13 (13, 14)       |
| Supraventricular Tachycardia                   | Cardiovascular | 65 (60, 71)       | 49 (43, 55)       | 89 (88, 90)       |
| Transient Ischaemic Attack                     | Cardiovascular | 168 (157, 179)    | 158 (144, 172)    | 212 (210, 213)    |
| Trifascicular Block                            | Cardiovascular | --                | --                | 5 (5, 5)          |
| Unstable Angina                                | Cardiovascular | 310 (296, 325)    | 140 (127, 153)    | 182 (181, 184)    |
| Venous thrombolism (Excl PE)                   | Cardiovascular | 83 (76, 89)       | 131 (121, 141)    | 181 (179, 182)    |
| Ventricular Tachycardia                        | Cardiovascular | 19 (16, 22)       | --                | 24 (24, 25)       |
| Abdominal Hernia                               | Digestive      | 501 (486, 516)    | 645 (627, 663)    | 869 (865, 873)    |
| Alcoholic Liver Disease                        | Digestive      | 23 (19, 26)       | 18 (14, 21)       | 44 (43, 45)       |
| Anal Fissure                                   | Digestive      | 330 (320, 340)    | 174 (165, 183)    | 264 (262, 266)    |
| Angiodysplasia of colon                        | Digestive      | --                | --                | 10 (9, 10)        |
| Anorectal Fistula                              | Digestive      | 73 (68, 78)       | 47 (42, 51)       | 53 (52, 54)       |
| Anorectal Prolapse                             | Digestive      | 26 (23, 30)       | 25 (21, 29)       | 38 (37, 38)       |
| Appendicitis                                   | Digestive      | 260 (251, 268)    | 278 (266, 290)    | 658 (655, 661)    |
| Autoimmune liver disease                       | Digestive      | --                | --                | 8 (8, 9)          |
| Barrett's Oesophagus                           | Digestive      | 31 (26, 35)       | --                | 65 (64, 66)       |
| Cholangitis                                    | Digestive      | 16 (13, 19)       | --                | 22 (21, 23)       |
| Cholecystitis                                  | Digestive      | 146 (138, 154)    | 96 (89, 104)      | 207 (206, 209)    |
| Cholelithiasis                                 | Digestive      | 306 (294, 318)    | 198 (187, 209)    | 404 (402, 406)    |
| Cirrhosis                                      | Digestive      | 36 (32, 40)       | 34 (28, 39)       | 43 (42, 44)       |
| Coeliac Disease                                | Digestive      | 30 (27, 33)       | --                | 42 (41, 42)       |
| Crohns Disease                                 | Digestive      | 35 (32, 38)       | 18 (15, 22)       | 53 (52, 54)       |
| Diaphragmatic Hernia                           | Digestive      | 466 (450, 482)    | 316 (299, 332)    | 588 (585, 591)    |
| Diverticular Disease                           | Digestive      | 220 (208, 233)    | 275 (258, 293)    | 539 (536, 541)    |
| Fatty Liver                                    | Digestive      | 54 (49, 58)       | 30 (25, 34)       | 49 (48, 50)       |
| Gastritis                                      | Digestive      | 929 (909, 949)    | 714 (692, 735)    | 748 (745, 751)    |
| Gastro-oesophageal Reflux Disease              | Digestive      | 1134 (1113, 1154) | 843 (821, 865)    | 1079 (1075, 1083) |
| Irritable Bowel Syndrome                       | Digestive      | 408 (396, 419)    | 300 (288, 312)    | 703 (699, 706)    |
| Liver Failure                                  | Digestive      | 18 (15, 21)       | --                | 18 (17, 18)       |
| Oesophageal Ulcer                              | Digestive      | 651 (634, 668)    | 423 (406, 440)    | 684 (681, 687)    |
| Oesophageal Varices                            | Digestive      | 15 (13, 18)       | --                | 17 (16, 17)       |
| Pancreatitis                                   | Digestive      | 71 (65, 77)       | 48 (42, 54)       | 73 (72, 74)       |
| Peptic Ulcer                                   | Digestive      | 310 (297, 324)    | 291 (275, 306)    | 277 (275, 279)    |
| Peritonitis                                    | Digestive      | 44 (40, 48)       | 56 (50, 62)       | 80 (79, 81)       |
| Portal Hypertension                            | Digestive      | 14 (11, 16)       | --                | 16 (15, 16)       |
| Ulcerative Colitis                             | Digestive      | 76 (71, 81)       | 31 (26, 35)       | 81 (80, 82)       |
| Volvulus                                       | Digestive      | --                | --                | 14 (14, 15)       |
| Deafness                                       | Ear            | 751 (732, 769)    | 443 (425, 460)    | 977 (974, 981)    |
| Meniere's Disease                              | Ear            | 24 (21, 28)       | --                | 41 (40, 41)       |
| Tinnitus                                       | Ear            | 356 (343, 369)    | 276 (261, 290)    | 344 (341, 346)    |
| Cystic Fibrosis                                | Endocrine      | --                | --                | 6 (5, 6)          |
| Diabetes Mellitus – other or not specified     | Endocrine      | 70 (64, 75)       | 66 (59, 72)       | 37 (36, 37)       |
| Hyperparathyroidism                            | Endocrine      | 52 (46, 57)       | 61 (54, 69)       | 23 (23, 24)       |
| Low HDL-C                                      | Endocrine      | 1444 (1419, 1470) | 730 (708, 753)    | 716 (712, 719)    |
| Obesity                                        | Endocrine      | 1512 (1489, 1536) | 2284 (2249, 2319) | 1865 (1859, 1870) |
| Polycystic Ovarian Syndrome                    | Endocrine      | 130 (123, 137)    | 77 (70, 83)       | 100 (98, 101)     |
| Raised LDL-C                                   | Endocrine      | 2075 (2044, 2105) | 1953 (1915, 1990) | 1583 (1578, 1588) |
| Raised Total Cholesterol                       | Endocrine      | 2681 (2647, 2716) | 2383 (2341, 2425) | 2528 (2522, 2534) |
| Raised Triglycerides                           | Endocrine      | 1845 (1816, 1874) | 637 (615, 660)    | 1212 (1207, 1216) |
| Syndrome of Inappropriate AntiDiuretic Hormone | Endocrine      | --                | --                | 6 (6, 7)          |
| Thyroid Disease                                | Endocrine      | 669 (653, 685)    | 307 (293, 321)    | 555 (552, 558)    |
| Type 1 Diabetes Mellitus                       | Endocrine      | 28 (25, 32)       | 37 (33, 42)       | 56 (55, 57)       |
| Type 2 Diabetes Mellitus                       | Endocrine      | 1622 (1592, 1652) | 1268 (1234, 1303) | 612 (609, 615)    |
| Anterior Uveitis                               | Eye            | 115 (108, 123)    | 134 (124, 144)    | 76 (75, 77)       |



|                                         |               |                   |                   |                   |
|-----------------------------------------|---------------|-------------------|-------------------|-------------------|
| Blindness                               | Eye           | 153 (144, 162)    | 194 (180, 208)    | 131 (130, 132)    |
| Cataract                                | Eye           | 1311 (1279, 1342) | 1105 (1066, 1143) | 711 (708, 714)    |
| Diabetic Eye Disease                    | Eye           | 580 (561, 598)    | 436 (415, 457)    | 213 (211, 215)    |
| Glaucoma                                | Eye           | 255 (242, 268)    | 430 (408, 451)    | 190 (188, 191)    |
| Keratitis                               | Eye           | 60 (56, 65)       | 37 (32, 41)       | 55 (55, 56)       |
| Macular Degeneration                    | Eye           | 186 (175, 198)    | 113 (101, 124)    | 153 (152, 155)    |
| Posterior Uveitis                       | Eye           | --                | --                | 6 (6, 6)          |
| Ptoxis                                  | Eye           | 36 (33, 40)       | 40 (35, 45)       | 44 (43, 45)       |
| Retinal Detachment                      | Eye           | 65 (59, 70)       | 62 (55, 69)       | 66 (65, 67)       |
| Retinal Vascular Occlusion              | Eye           | 57 (51, 63)       | 46 (38, 53)       | 45 (44, 46)       |
| Scleritis                               | Eye           | 60 (55, 64)       | 45 (40, 50)       | 48 (47, 48)       |
| Acute Kidney Injury                     | Genitourinary | 250 (236, 263)    | 263 (246, 280)    | 225 (223, 227)    |
| Benign Prostatic Hyperplasia            | Genitourinary | 827 (792, 863)    | 871 (822, 920)    | 842 (836, 847)    |
| Chronic Cystitis                        | Genitourinary | 14 (11, 16)       | --                | 24 (24, 25)       |
| Chronic Kidney Disease                  | Genitourinary | 561 (539, 582)    | 494 (469, 520)    | 462 (459, 464)    |
| Dysmenorrhoea                           | Genitourinary | 503 (488, 518)    | 612 (592, 632)    | 657 (653, 662)    |
| End Stage Renal Disease                 | Genitourinary | 62 (56, 68)       | 80 (72, 89)       | 32 (32, 33)       |
| Endometrial Hyperplasia                 | Genitourinary | 70 (63, 78)       | 71 (63, 79)       | 83 (82, 85)       |
| Endometriosis                           | Genitourinary | 177 (168, 187)    | 148 (138, 158)    | 268 (265, 271)    |
| Erectile Dysfunction                    | Genitourinary | 1147 (1115, 1180) | 1471 (1421, 1520) | 1005 (999, 1010)  |
| Female Infertility                      | Genitourinary | 327 (315, 339)    | 314 (300, 329)    | 265 (262, 267)    |
| Glomerulonephritis                      | Genitourinary | 83 (77, 89)       | 82 (74, 90)       | 78 (77, 79)       |
| Hydrocele                               | Genitourinary | 105 (97, 113)     | 146 (133, 160)    | 241 (238, 243)    |
| Male infertility                        | Genitourinary | 83 (76, 89)       | 85 (77, 94)       | 65 (64, 67)       |
| Menorrhagia                             | Genitourinary | 1268 (1241, 1295) | 1317 (1286, 1349) | 1520 (1513, 1526) |
| Neuropathic Bladder                     | Genitourinary | 117 (110, 125)    | 101 (92, 109)     | 112 (111, 114)    |
| Obstructive and reflux uropathy         | Genitourinary | 77 (72, 82)       | 65 (58, 71)       | 104 (103, 105)    |
| Postcoital Bleeding                     | Genitourinary | 116 (109, 123)    | 148 (137, 158)    | 300 (297, 303)    |
| Postmenopausal Bleeding                 | Genitourinary | 369 (349, 390)    | 359 (334, 384)    | 434 (431, 438)    |
| Tubulo-interstitial Nephropathy         | Genitourinary | 49 (45, 53)       | 35 (32, 39)       | 38 (38, 39)       |
| Undescended Testis                      | Genitourinary | 56 (52, 60)       | 57 (52, 63)       | 106 (104, 108)    |
| Urinary Incontinence                    | Genitourinary | 468 (454, 483)    | 369 (353, 385)    | 446 (444, 449)    |
| Urolithiasis                            | Genitourinary | 258 (248, 267)    | 150 (140, 160)    | 278 (276, 281)    |
| Uterovaginal Prolapse                   | Genitourinary | 400 (380, 420)    | 289 (269, 310)    | 603 (599, 608)    |
| Agranulocytosis                         | Haem/Imm      | 51 (47, 55)       | 146 (137, 155)    | 68 (67, 69)       |
| Anaemia – other                         | Haem/Imm      | 920 (901, 939)    | 800 (778, 821)    | 546 (543, 549)    |
| Aplastic Anaemia                        | Haem/Imm      | 15 (12, 18)       | 23 (19, 27)       | 14 (13, 14)       |
| Folate Deficiency Anaemia               | Haem/Imm      | 24 (20, 27)       | --                | 18 (17, 18)       |
| Hypersplenism                           | Haem/Imm      | 12 (10, 14)       | 12 (10, 14)       | 18 (18, 19)       |
| Hyposplenism                            | Haem/Imm      | --                | --                | 18 (17, 18)       |
| Immunodeficiency                        | Haem/Imm      | --                | --                | 8 (7, 8)          |
| Iron Deficiency Anaemia                 | Haem/Imm      | 1050 (1031, 1069) | 631 (613, 649)    | 448 (445, 450)    |
| Other haemolytic anaemia                | Haem/Imm      | 21 (19, 23)       | 38 (34, 42)       | 12 (11, 12)       |
| Primary thrombocytopaenia               | Haem/Imm      | 19 (16, 21)       | 18 (15, 21)       | 18 (17, 18)       |
| Sarcoidosis                             | Haem/Imm      | 37 (33, 41)       | 58 (52, 64)       | 21 (20, 21)       |
| Secondary Polycythaemia                 | Haem/Imm      | --                | --                | 12 (11, 12)       |
| Secondary Thrombocytopaenia             | Haem/Imm      | 53 (48, 57)       | 83 (75, 90)       | 50 (49, 51)       |
| Sickle Cell Disease                     | Haem/Imm      | --                | 61 (56, 65)       | 0 (0, 1)          |
| Sickle Cell Trait                       | Haem/Imm      | 10 (9, 12)        | 382 (370, 395)    | 1 (1, 2)          |
| Thalassaemia                            | Haem/Imm      | 34 (31, 37)       | 33 (29, 36)       | 2 (2, 3)          |
| Thalassaemia Trait                      | Haem/Imm      | 124 (119, 130)    | 79 (73, 85)       | 5 (5, 6)          |
| Thrombophilia                           | Haem/Imm      | 7 (6, 9)          | --                | 14 (14, 15)       |
| Vitamin B12 deficiency anaemia          | Haem/Imm      | 116 (108, 123)    | 28 (23, 32)       | 55 (54, 56)       |
| Bacterial Infection                     | Infections    | 1118 (1098, 1138) | 1058 (1033, 1082) | 1209 (1205, 1213) |
| Chronic Hepatitis                       | Infections    | 45 (41, 48)       | 82 (76, 88)       | 25 (25, 26)       |
| Encephalitis                            | Infections    | --                | --                | 3 (3, 3)          |
| Fungal Infection                        | Infections    | 78 (73, 84)       | 89 (82, 96)       | 90 (88, 91)       |
| HIV                                     | Infections    | --                | 107 (101, 113)    | 7 (6, 7)          |
| Infection – Anorectal                   | Infections    | 44 (40, 47)       | 36 (32, 40)       | 46 (45, 47)       |
| Infection – Bone                        | Infections    | 35 (31, 39)       | 45 (40, 50)       | 35 (35, 36)       |
| Infection – Digestive System            | Infections    | 332 (322, 343)    | 252 (240, 263)    | 300 (298, 303)    |
| Infection – Ear/Upper Respiratory Tract | Infections    | 331 (323, 339)    | 258 (249, 267)    | 502 (499, 505)    |
| Infection – Eye                         | Infections    | 25 (23, 27)       | 22 (19, 24)       | 33 (32, 33)       |
| Infection – Heart                       | Infections    | --                | --                | 7 (7, 7)          |
| Infection – Liver                       | Infections    | 42 (38, 46)       | 60 (55, 66)       | 23 (23, 24)       |
| Infection – Lower Respiratory Tract     | Infections    | 669 (653, 686)    | 573 (555, 591)    | 733 (730, 737)    |
| Infection – Male Genitourinary          | Infections    | 48 (43, 54)       | 80 (70, 90)       | 87 (85, 89)       |
| Infection – Other Genitourinary         | Infections    | 20 (18, 22)       | 26 (23, 29)       | 28 (28, 29)       |
| Infection – Other nervous system        | Infections    | 16 (13, 18)       | 16 (13, 19)       | 13 (13, 14)       |
| Infection – Other organisms             | Infections    | 929 (912, 946)    | 762 (743, 780)    | 1166 (1162, 1170) |

|                                      |                 |                   |                   |                   |
|--------------------------------------|-----------------|-------------------|-------------------|-------------------|
| Infection – Other organs             | Infections      | 387 (377, 397)    | 419 (406, 432)    | 400 (397, 402)    |
| Infection – Skin                     | Infections      | 281 (271, 290)    | 239 (229, 250)    | 366 (364, 369)    |
| Meningitis                           | Infections      | 11 (9, 13)        | 10 (8, 12)        | 15 (14, 15)       |
| Parasitic Infection                  | Infections      | 17 (15, 20)       | 76 (70, 82)       | 13 (13, 14)       |
| Pelvic Inflammatory Disease          | Infections      | 141 (132, 150)    | 203 (190, 215)    | 222 (220, 225)    |
| Rheumatic Fever                      | Infections      | 29 (25, 33)       | 33 (27, 38)       | 41 (40, 41)       |
| Septicaemia                          | Infections      | 146 (139, 154)    | 143 (134, 152)    | 147 (146, 149)    |
| Tuberculosis                         | Infections      | 371 (359, 383)    | 169 (160, 178)    | 55 (54, 55)       |
| Urinary Tract Infection              | Infections      | 474 (459, 489)    | 434 (416, 453)    | 507 (505, 510)    |
| Viral Infection                      | Infections      | 317 (309, 325)    | 272 (263, 281)    | 409 (406, 411)    |
| Ankylosing Spondylosis               | Musculoskeletal | 13 (11, 15)       | --                | 23 (22, 23)       |
| Carpal Tunnel Syndrome               | Musculoskeletal | 330 (319, 342)    | 313 (299, 328)    | 420 (418, 423)    |
| Collapsed Vertebra                   | Musculoskeletal | 24 (20, 28)       | --                | 33 (33, 34)       |
| Enteropathic Arthropathy             | Musculoskeletal | --                | --                | 1 (1, 2)          |
| Enthesopathy                         | Musculoskeletal | 1783 (1755, 1810) | 1467 (1437, 1498) | 2029 (2023, 2034) |
| Fibromatosis                         | Musculoskeletal | 38 (33, 43)       | 33 (27, 39)       | 127 (126, 129)    |
| Fracture – Hip                       | Musculoskeletal | 72 (64, 79)       | 35 (29, 41)       | 138 (137, 140)    |
| Fracture – Wrist                     | Musculoskeletal | 125 (118, 132)    | 72 (66, 77)       | 382 (380, 384)    |
| Giant Cell Arteritis                 | Musculoskeletal | 24 (20, 28)       | --                | 20 (19, 20)       |
| Gout                                 | Musculoskeletal | 292 (279, 304)    | 309 (291, 327)    | 345 (343, 347)    |
| Intervertebral Disc Disorder         | Musculoskeletal | 285 (274, 297)    | 204 (192, 216)    | 372 (369, 374)    |
| Juvenile Arthritis                   | Musculoskeletal | --                | --                | 8 (8, 8)          |
| Lupus Erythematosus                  | Musculoskeletal | 25 (22, 28)       | 34 (30, 38)       | 17 (17, 18)       |
| Osteoarthritis                       | Musculoskeletal | 1374 (1344, 1404) | 1192 (1158, 1227) | 1417 (1412, 1422) |
| Osteoporosis                         | Musculoskeletal | 356 (340, 371)    | 154 (142, 167)    | 333 (331, 335)    |
| Polymyalgia Rheumatica               | Musculoskeletal | 64 (58, 71)       | 39 (32, 46)       | 97 (96, 99)       |
| Psoriatic Arthritis                  | Musculoskeletal | 19 (16, 22)       | --                | 28 (27, 29)       |
| Reactive Arthritis                   | Musculoskeletal | 9 (7, 11)         | --                | 12 (12, 13)       |
| Rheumatoid Arthritis                 | Musculoskeletal | 140 (132, 149)    | 91 (83, 100)      | 132 (130, 133)    |
| Scleroderma                          | Musculoskeletal | --                | --                | 5 (5, 5)          |
| Scoliosis                            | Musculoskeletal | 61 (56, 66)       | 54 (48, 59)       | 88 (87, 90)       |
| Sjogren Syndrome                     | Musculoskeletal | 19 (16, 23)       | --                | 12 (11, 12)       |
| Spinal Stenosis                      | Musculoskeletal | 98 (91, 106)      | 104 (93, 115)     | 92 (91, 93)       |
| Spondylolisthesis                    | Musculoskeletal | 40 (35, 45)       | 41 (34, 48)       | 41 (40, 42)       |
| Spondylosis                          | Musculoskeletal | 489 (472, 506)    | 404 (383, 424)    | 509 (506, 512)    |
| Autonomic Neuropathy                 | Neurological    | 25 (22, 29)       | 28 (23, 34)       | 31 (30, 31)       |
| Bell's Palsy                         | Neurological    | 86 (80, 92)       | 73 (67, 79)       | 82 (81, 83)       |
| Cerebral Palsy                       | Neurological    | 11 (10, 12)       | 12 (10, 14)       | 20 (20, 21)       |
| Chronic Fatigue Syndrome             | Neurological    | 109 (102, 115)    | 61 (55, 67)       | 171 (170, 173)    |
| Diabetic Neuropathy                  | Neurological    | 83 (75, 90)       | 78 (69, 88)       | 47 (46, 48)       |
| Epilepsy                             | Neurological    | 120 (114, 126)    | 137 (129, 145)    | 218 (216, 220)    |
| Essential Tremor                     | Neurological    | 27 (24, 31)       | --                | 28 (27, 29)       |
| Idiopathic Intracranial Hypertension | Neurological    | --                | --                | 6 (6, 7)          |
| Migraine                             | Neurological    | 516 (504, 528)    | 429 (416, 442)    | 788 (785, 791)    |
| Motor Neurone Disease                | Neurological    | --                | --                | 5 (5, 5)          |
| Multiple Sclerosis                   | Neurological    | 9 (7, 10)         | --                | 32 (31, 33)       |
| Myasthenia Gravis                    | Neurological    | --                | --                | 5 (4, 5)          |
| Parkinson's Disease                  | Neurological    | 50 (43, 56)       | 41 (33, 49)       | 51 (50, 52)       |
| Peripheral Neuropathy                | Neurological    | 245 (234, 257)    | 203 (190, 216)    | 253 (251, 255)    |
| Trigeminal Neuralgia                 | Neurological    | 41 (36, 45)       | 37 (31, 42)       | 61 (60, 62)       |
| Congenital Septal Defect             | Perinatal       | 31 (28, 33)       | 23 (21, 26)       | 44 (43, 44)       |
| Down Syndrome                        | Perinatal       | 5 (4, 7)          | --                | 9 (8, 9)          |
| High Birth Weight                    | Perinatal       | 4 (3, 4)          | 5 (4, 6)          | 12 (12, 13)       |
| Intrauterine Hypoxia                 | Perinatal       | 36 (33, 38)       | 39 (36, 42)       | 56 (55, 57)       |
| Low Birth Weight                     | Perinatal       | 75 (72, 78)       | 50 (47, 53)       | 63 (62, 64)       |
| Neonatal Jaundice                    | Perinatal       | 90 (87, 94)       | 44 (41, 47)       | 106 (105, 107)    |
| Patent Ductus Arteriosus             | Perinatal       | 12 (10, 13)       | 10 (8, 11)        | 12 (11, 12)       |
| Post-term Delivery                   | Perinatal       | 4 (3, 4)          | --                | 10 (10, 11)       |
| Premature Delivery                   | Perinatal       | 50 (47, 53)       | 56 (53, 60)       | 80 (79, 81)       |
| Respiratory Distress of the Newborn  | Perinatal       | 31 (29, 33)       | 38 (36, 41)       | 49 (49, 50)       |
| Sepsis of the Newborn                | Perinatal       | 17 (15, 18)       | 18 (16, 19)       | 18 (17, 18)       |
| Spina Bifida                         | Perinatal       | --                | --                | 14 (14, 15)       |
| Alcohol Misuse                       | Psychiatric     | 180 (173, 188)    | 162 (153, 171)    | 370 (367, 372)    |
| Anxiety                              | Psychiatric     | 677 (662, 692)    | 587 (571, 604)    | 1496 (1491, 1501) |
| Autism                               | Psychiatric     | 20 (18, 22)       | 35 (32, 38)       | 46 (45, 47)       |
| Bipolar Affective Disorder           | Psychiatric     | 37 (33, 40)       | 47 (43, 52)       | 55 (55, 56)       |
| Delirium                             | Psychiatric     | 44 (38, 50)       | 73 (63, 83)       | 64 (63, 65)       |
| Dementia                             | Psychiatric     | 180 (167, 193)    | 278 (257, 300)    | 222 (220, 223)    |
| Depression                           | Psychiatric     | 1098 (1079, 1118) | 989 (967, 1011)   | 2031 (2025, 2036) |
| Eating Disorders                     | Psychiatric     | 11 (9, 12)        | 8 (7, 10)         | 40 (39, 41)       |
| Hyperkinetic Disorders               | Psychiatric     | 7 (6, 8)          | 15 (13, 17)       | 45 (44, 46)       |

|                                       |             |                   |                   |                   |
|---------------------------------------|-------------|-------------------|-------------------|-------------------|
| Intellectual Disability               | Psychiatric | 43 (40, 46)       | 51 (47, 56)       | 80 (78, 81)       |
| Obsessive Compulsive Disorder         | Psychiatric | 23 (20, 25)       | --                | 51 (50, 52)       |
| Personality Disorder                  | Psychiatric | 19 (17, 22)       | 27 (23, 30)       | 81 (80, 82)       |
| Schizophrenia                         | Psychiatric | 93 (87, 98)       | 198 (188, 208)    | 88 (86, 89)       |
| Substance Misuse                      | Psychiatric | 78 (73, 82)       | 143 (135, 151)    | 208 (207, 210)    |
| Allergic/chronic Rhinitis             | Respiratory | 1885 (1862, 1908) | 1916 (1888, 1944) | 1524 (1519, 1529) |
| Asbestosis                            | Respiratory | --                | --                | 14 (13, 14)       |
| Aspiration Pneumonitis                | Respiratory | 48 (43, 54)       | 49 (41, 56)       | 47 (46, 48)       |
| Asthma                                | Respiratory | 1428 (1408, 1449) | 1172 (1150, 1195) | 1675 (1670, 1680) |
| Bronchiectasis                        | Respiratory | 70 (63, 76)       | 42 (36, 48)       | 65 (64, 66)       |
| Chronic Obstructive Pulmonary Disease | Respiratory | 252 (238, 266)    | 179 (165, 193)    | 430 (428, 433)    |
| Chronic Sinusitis                     | Respiratory | 158 (150, 165)    | 147 (138, 156)    | 250 (248, 252)    |
| Hypertrophic Nasal Turbinates         | Respiratory | 49 (46, 52)       | 32 (29, 36)       | 46 (45, 47)       |
| Nasal Polyps                          | Respiratory | 108 (102, 114)    | 64 (58, 70)       | 123 (122, 124)    |
| Pleural Effusion                      | Respiratory | 178 (168, 188)    | 148 (137, 159)    | 189 (187, 191)    |
| Pleural Plaque                        | Respiratory | --                | --                | 25 (25, 26)       |
| Pneumothorax                          | Respiratory | 29 (25, 32)       | 22 (19, 25)       | 59 (59, 60)       |
| Pulmonary Collapse                    | Respiratory | 47 (42, 52)       | 51 (45, 58)       | 67 (66, 68)       |
| Pulmonary Fibrosis                    | Respiratory | 46 (40, 52)       | --                | 32 (31, 32)       |
| Respiratory Failure                   | Respiratory | 99 (91, 107)      | 83 (74, 91)       | 95 (94, 96)       |
| Sleep apnoea                          | Respiratory | 110 (104, 116)    | 133 (125, 140)    | 122 (121, 123)    |
| Acne                                  | Skin        | 714 (702, 726)    | 587 (573, 601)    | 767 (763, 770)    |
| Actinic keratosis                     | Skin        | 24 (20, 28)       | --                | 299 (297, 301)    |
| Alopecia Areata                       | Skin        | 80 (76, 85)       | 40 (36, 44)       | 36 (35, 37)       |
| Dermatitis                            | Skin        | 2870 (2843, 2898) | 2145 (2118, 2173) | 2647 (2641, 2653) |
| Hidradenitis                          | Skin        | 24 (21, 26)       | 36 (33, 40)       | 31 (31, 32)       |
| Lichen Planus                         | Skin        | 146 (138, 154)    | 51 (45, 56)       | 63 (62, 64)       |
| Pilonidal cyst/sinus                  | Skin        | 82 (77, 86)       | 40 (36, 44)       | 106 (105, 108)    |
| Psoriasis                             | Skin        | 270 (260, 279)    | 99 (92, 106)      | 388 (385, 390)    |
| Rosacea                               | Skin        | 149 (143, 156)    | 55 (51, 60)       | 275 (273, 277)    |
| Seborrheic Dermatitis                 | Skin        | 587 (575, 599)    | 359 (348, 370)    | 521 (519, 524)    |
| Urticaria                             | Skin        | 633 (620, 647)    | 366 (354, 378)    | 551 (548, 554)    |
| Vitiligo                              | Skin        | 135 (128, 142)    | 68 (62, 73)       | 31 (31, 32)       |

--Small numbers: to protect patient confidentiality, where prevalence counts were <100, period prevalence estimates have been replaced with "--".

**Supplementary Table S7A.** Median (interquartile range) age of first record for 308 medical conditions by sex.

| Condition                 | Category       | Both sexes     | Female              | Male          |
|---------------------------|----------------|----------------|---------------------|---------------|
| Benign Neo – Brain        | Benign Neo     | 55 (41, 69)    | 55 (40, 70)         | 55 (42, 67)   |
| Benign Neo – Colon        | Benign Neo     | 63 (52, 72)    | 63 (52, 72)         | 63 (53, 71)   |
| Benign Neo – Ovary        | Benign Neo     | 36 (27, 47)    | 36 (27, 47)         | NA (NA, NA)   |
| Benign Neo – Stomach      | Benign Neo     | 66 (56, 75)    | 66 (56, 75)         | 65 (55, 74)   |
| Benign Neo – Uterus       | Benign Neo     | 52 (44, 61)    | 52 (44, 61)         | NA (NA, NA)   |
| CIN                       | Benign Neo     | 31 (26, 39)    | 31 (26, 39)         | NA (NA, NA)   |
| Haemangioma               | Benign Neo     | 34 (3, 53)     | 34 (2, 52)          | 35 (6, 55)    |
| Leiomyoma                 | Benign Neo     | 46 (40, 51)    | 46 (40, 51)         | NA (NA, NA)   |
| Hodgkins Lymphoma         | Cancers        | 34 (23, 53)    | 33 (23, 55)         | 35 (23, 52)   |
| Leukaemia                 | Cancers        | 64 (47, 76)    | 65 (45, 77)         | 64 (49, 75)   |
| MGUS                      | Cancers        | 72 (63, 80)    | 73 (63, 81)         | 72 (63, 79)   |
| Myelodysplastic Syndrome  | Cancers        | 76 (66, 83)    | 76 (65, 84)         | 76 (67, 83)   |
| Non Hodgkins Lymphoma     | Cancers        | 62 (48, 73)    | 64 (51, 75)         | 61 (47, 72)   |
| Plasma Cell Ca            | Cancers        | 70 (61, 79)    | 71 (62, 79)         | 69 (60, 78)   |
| Polycythaemia vera        | Cancers        | 58 (47, 69)    | 63 (51, 75)         | 56 (45, 66)   |
| Pri Ca – Biliary          | Cancers        | 72 (63, 81)    | 74 (64, 82)         | 71 (62, 79)   |
| Pri Ca – Bladder          | Cancers        | 71 (62, 78)    | 71 (62, 79)         | 70 (62, 78)   |
| Pri Ca – Bone             | Cancers        | 49 (25, 69)    | 52 (27, 70)         | 47 (24, 68)   |
| Pri Ca – Bowel            | Cancers        | 69 (60, 78)    | 70 (60, 79)         | 69 (60, 77)   |
| Pri Ca – Brain            | Cancers        | 52 (28, 68)    | 52 (29, 68)         | 52 (28, 67)   |
| Pri Ca – Breast           | Cancers        | 59 (50, 68)    | 59 (50, 68)         | 67 (57, 77)   |
| Pri Ca – Cervix           | Cancers        | 41 (34, 54)    | 41 (34, 54)         | NA (NA, NA)   |
| Pri Ca – Kidney           | Cancers        | 67 (57, 76)    | 68 (57, 78)         | 67 (58, 75)   |
| Pri Ca – Liver            | Cancers        | 69 (60, 77)    | 70.5 (59.75, 78.25) | 68 (60, 77)   |
| Pri Ca – Lung             | Cancers        | 71 (64, 79)    | 71 (63, 80)         | 72 (64, 79)   |
| Pri Ca – Melanoma         | Cancers        | 57 (42.75, 70) | 54 (40, 68)         | 60 (47, 72)   |
| Pri Ca – Mesothelioma     | Cancers        | 72 (65, 79)    | 71 (64, 78)         | 73 (66, 80)   |
| Pri Ca – Multiple Sites   | Cancers        | 74 (66, 83)    | 72 (61, 80)         | 76 (68, 84)   |
| Pri Ca – Oesophageal      | Cancers        | 70 (62, 79)    | 74 (64, 83)         | 69 (61, 77)   |
| Pri Ca – Oropharyngeal    | Cancers        | 61 (51, 71)    | 62 (51, 73)         | 60 (52, 70)   |
| Pri Ca – other            | Cancers        | 65 (51, 76)    | 65 (51, 77)         | 64 (52, 75)   |
| Pri Ca – Ovary            | Cancers        | 61 (49, 71)    | 61 (49, 71)         | NA (NA, NA)   |
| Pri Ca – Pancreas         | Cancers        | 72 (63, 81)    | 73 (64, 82)         | 71 (62, 79)   |
| Pri Ca – Prostate         | Cancers        | 71 (64, 77)    | NA (NA, NA)         | 71 (64, 77)   |
| Pri Ca – Skin             | Cancers        | 68 (57, 77)    | 67 (56, 78)         | 68 (58, 76)   |
| Pri Ca – Stomach          | Cancers        | 72 (62, 79)    | 72 (62, 81)         | 71 (63, 79)   |
| Pri Ca – Testis           | Cancers        | 34 (28, 42)    | NA (NA, NA)         | 34 (28, 42)   |
| Pri Ca – Thyroid          | Cancers        | 47 (35, 61)    | 45 (35, 59)         | 52 (40, 67)   |
| Pri Ca – Uterus           | Cancers        | 64 (57, 72)    | 64 (57, 72)         | NA (NA, NA)   |
| Sec Ca – Adrenal          | Cancers        | 69 (61, 77)    | 69 (61, 77)         | 69 (62, 76)   |
| Sec Ca – Bone             | Cancers        | 71 (62, 80)    | 67 (57, 77)         | 74 (66, 81)   |
| Sec Ca – Bowel            | Cancers        | 68 (60, 77)    | 67 (58, 75)         | 71 (62, 79)   |
| Sec Ca – Brain            | Cancers        | 67 (57, 76)    | 65 (55, 75)         | 69 (60, 77)   |
| Sec Ca – Liver            | Cancers        | 70 (61, 79)    | 70 (60, 79)         | 71 (63, 79)   |
| Sec Ca – Lung             | Cancers        | 70 (60, 79)    | 69 (58, 79)         | 71 (62, 78)   |
| Sec Ca – Lymph Nodes      | Cancers        | 63 (53, 73)    | 62 (51, 72)         | 66 (57, 74)   |
| Sec Ca – other            | Cancers        | 70 (60, 80)    | 68 (57.75, 79)      | 72 (63, 81)   |
| Sec Ca – Peritoneum       | Cancers        | 68 (59, 76)    | 67 (59, 76)         | 68 (59, 76)   |
| Sec Ca – Pleura           | Cancers        | 70 (61, 79)    | 70 (61, 78)         | 71 (63, 79)   |
| AAA                       | Cardiovascular | 74 (66, 81)    | 78 (70, 84)         | 73 (65, 80)   |
| Atrial Fibrillation       | Cardiovascular | 74 (65, 82)    | 78 (69, 85)         | 71 (62, 79)   |
| AV Block, first degree    | Cardiovascular | 80 (71, 86)    | 82 (74, 88)         | 78 (69, 85)   |
| AV Block, second degree   | Cardiovascular | 76 (65, 83)    | 78 (66.75, 85)      | 75 (65, 82)   |
| AV Block, third degree    | Cardiovascular | 77 (68, 84)    | 79 (69, 86)         | 77 (67, 83)   |
| Bifascicular Block        | Cardiovascular | 82 (73, 87)    | 85 (78, 89)         | 80 (72.5, 86) |
| Cardiomyopathy – other    | Cardiovascular | 61 (49, 72)    | 64 (49, 75)         | 61 (49, 71)   |
| CHD – nos                 | Cardiovascular | 70 (60, 79)    | 73 (63, 82)         | 67 (58, 76)   |
| Dilated cardiomyopathy    | Cardiovascular | 60 (49, 70)    | 63 (50, 73)         | 59 (49, 69)   |
| Heart Failure             | Cardiovascular | 76 (66, 84)    | 79 (70, 86)         | 73 (63, 81)   |
| HOCM                      | Cardiovascular | 57 (43, 70)    | 65 (51, 76)         | 53 (40, 64)   |
| Hypertension              | Cardiovascular | 59 (49, 69)    | 60 (50, 71)         | 58 (49, 67)   |
| Intracerebral Haemorrhage | Cardiovascular | 70 (56, 81)    | 74 (59, 83)         | 66 (54, 78)   |
| Ischaemic Stroke          | Cardiovascular | 74 (63, 83)    | 77 (67, 85)         | 70 (60, 79)   |
| LBBB                      | Cardiovascular | 77 (67, 85)    | 79 (69, 86)         | 75 (66, 83)   |

|                           |                |                |             |                |
|---------------------------|----------------|----------------|-------------|----------------|
| Multiple valve disorder   | Cardiovascular | 77 (67, 84)    | 79 (70, 86) | 75 (65, 83)    |
| Myocardial Infarction     | Cardiovascular | 65 (55, 76)    | 72 (61, 82) | 62 (53, 72)    |
| Non-rheum Aortic valve dz | Cardiovascular | 74 (63, 82)    | 77 (66, 84) | 72 (61, 80)    |
| Non-rheum Mitral valve dz | Cardiovascular | 68 (53, 78)    | 69 (50, 79) | 67 (55, 77)    |
| PAD                       | Cardiovascular | 68 (59, 77)    | 71 (60, 80) | 66 (58, 75)    |
| Pericardial Effusion      | Cardiovascular | 66 (50.25, 77) | 68 (53, 78) | 64 (49, 75)    |
| Pri Pulmonary HTN         | Cardiovascular | 74 (60, 82)    | 75 (61, 83) | 72 (58, 80)    |
| Pulmonary Embolism        | Cardiovascular | 62 (46, 75)    | 63 (43, 76) | 62 (49, 73)    |
| Raynauds Disease          | Cardiovascular | 44 (29, 60)    | 42 (28, 58) | 51 (35, 64)    |
| RBBB                      | Cardiovascular | 75 (61, 84)    | 78 (63, 87) | 73 (60, 82)    |
| Rheum Valve dz            | Cardiovascular | 70 (54, 80)    | 71 (53, 81) | 69 (55, 79)    |
| Sec Pulmonary HTN         | Cardiovascular | 77 (65, 84)    | 78 (66, 85) | 76 (65, 83)    |
| Sick Sinus Syndrome       | Cardiovascular | 75 (65, 83)    | 77 (68, 84) | 73 (62, 81)    |
| Stable Angina             | Cardiovascular | 64 (55, 73)    | 67 (57, 75) | 62 (54, 71)    |
| Stroke – nos              | Cardiovascular | 72 (61, 81)    | 75 (63, 83) | 69 (59, 78)    |
| Subarach Haemorrhage      | Cardiovascular | 51 (40, 65)    | 53 (42, 67) | 49 (37, 62)    |
| Subdural haematoma        | Cardiovascular | 76 (61, 84)    | 77 (63, 86) | 75 (60, 83)    |
| SVT                       | Cardiovascular | 57 (39, 71)    | 56 (38, 71) | 58 (41, 70)    |
| TIA                       | Cardiovascular | 70 (61, 79)    | 73 (63, 81) | 68 (60, 77)    |
| Trifascicular Block       | Cardiovascular | 82 (76, 87)    | 85 (77, 90) | 81 (75, 86)    |
| Unstable Angina           | Cardiovascular | 66 (57, 76)    | 71 (60, 80) | 64 (55, 74)    |
| Ventricular Tachycardia   | Cardiovascular | 66 (54, 76)    | 64 (49, 77) | 66 (55, 76)    |
| VTE (Excl PE)             | Cardiovascular | 58 (41, 72)    | 57 (38, 73) | 58 (44, 70)    |
| Abdominal Hernia          | Digestive      | 46 (23, 62)    | 43 (18, 63) | 46 (24, 61)    |
| Alcoholic Liver Disease   | Digestive      | 52 (43, 61)    | 52 (43, 61) | 52 (43, 61)    |
| Anal Fissure              | Digestive      | 34 (23, 47)    | 32 (23, 44) | 37 (24, 49)    |
| Angiodysplasia of colon   | Digestive      | 70 (61, 79)    | 71 (61, 79) | 70 (61, 78)    |
| Anorectal Fistula         | Digestive      | 40 (30, 51)    | 38 (28, 48) | 41 (31, 52)    |
| Anorectal Prolapse        | Digestive      | 60 (40, 75)    | 64 (46, 77) | 47 (6, 65)     |
| Appendicitis              | Digestive      | 19 (13, 30)    | 20 (14, 31) | 18 (12, 29)    |
| Autoimmune liver disease  | Digestive      | 57 (45, 68)    | 58 (47, 68) | 54 (39, 66)    |
| Barretts Oesophagus       | Digestive      | 64 (54, 74)    | 67 (57, 77) | 63 (52, 72)    |
| Cholangitis               | Digestive      | 70 (55, 81)    | 70 (54, 82) | 70 (56, 79)    |
| Cholecystitis             | Digestive      | 53 (40, 67)    | 50 (37, 64) | 60 (48, 71)    |
| Cholelithiasis            | Digestive      | 55 (41, 68)    | 52 (38, 66) | 61 (48, 73)    |
| Cirrhosis                 | Digestive      | 54 (44, 64)    | 55 (45, 66) | 54 (44, 63)    |
| Coeliac Disease           | Digestive      | 41 (23, 57)    | 40 (24, 56) | 43 (17, 59.75) |
| Crohns Disease            | Digestive      | 35 (24, 52)    | 35 (24, 52) | 35 (23, 51)    |
| Diaphragmatic Hernia      | Digestive      | 60 (47, 71)    | 61 (50, 72) | 57 (44, 68)    |
| Diverticular Disease      | Digestive      | 67 (57, 75)    | 67 (58, 76) | 65 (56, 74)    |
| Fatty Liver               | Digestive      | 54 (43, 64)    | 55 (45, 66) | 53 (43, 63)    |
| Gastritis                 | Digestive      | 51 (35, 66)    | 52 (36, 67) | 49 (34, 65)    |
| GORD                      | Digestive      | 50 (34, 64)    | 51 (35, 65) | 47 (32, 62)    |
| IBS                       | Digestive      | 37 (27, 51)    | 37 (26, 50) | 39 (28, 51)    |
| Liver Failure             | Digestive      | 57 (45, 69.75) | 56 (43, 70) | 58 (46, 69)    |
| Oesophageal Ulcer         | Digestive      | 53 (40, 66)    | 55 (41, 67) | 51 (38, 64)    |
| Oesophageal Varices       | Digestive      | 57 (47, 67)    | 58 (47, 69) | 56 (46, 65)    |
| Pancreatitis              | Digestive      | 53 (38, 67)    | 53 (38, 68) | 52 (39, 66)    |
| Peptic Ulcer              | Digestive      | 51 (36, 67)    | 56 (41, 71) | 48 (33, 64)    |
| Peritonitis               | Digestive      | 52 (32, 69)    | 55 (34, 72) | 49 (29, 65)    |
| Portal Hypertension       | Digestive      | 56 (46, 66)    | 57 (46, 68) | 56 (46, 65)    |
| Ulcerative Colitis        | Digestive      | 41 (29, 57)    | 41 (29, 57) | 42 (29, 57)    |
| Volvulus                  | Digestive      | 65 (48, 78)    | 64 (48, 78) | 66 (49, 79)    |
| Deafness                  | Ear            | 52 (23, 70)    | 54 (26, 73) | 50 (19, 67)    |
| Menieres Disease          | Ear            | 55 (44, 67)    | 55 (44, 68) | 55 (44, 66)    |
| Tinnitus                  | Ear            | 53 (41, 64)    | 54 (41, 66) | 52 (40, 63)    |
| Cystic Fibrosis           | Endocrine      | 30 (2, 45)     | 36 (13, 47) | 3 (0, 23)      |
| DM – other or nos         | Endocrine      | 57 (41, 71)    | 57 (38, 72) | 58 (44, 70)    |
| Hyperparathyroidism       | Endocrine      | 67 (54, 77.5)  | 68 (56, 78) | 63 (48, 75)    |
| Low HDL                   | Endocrine      | 57 (46, 67)    | 57 (46, 68) | 57 (47, 66)    |
| Obesity                   | Endocrine      | 45 (33, 58)    | 43 (31, 56) | 48 (38, 59)    |
| PCOS                      | Endocrine      | 27 (22, 32)    | 27 (22, 32) | NA (NA, NA)    |
| Raised LDL                | Endocrine      | 57 (48, 66)    | 59 (50, 68) | 55 (46, 64)    |
| Raised Total Cholesterol  | Endocrine      | 56 (47, 65)    | 58 (49, 67) | 54 (45, 63)    |
| Raised Triglycerides      | Endocrine      | 57 (48, 66)    | 60 (51, 69) | 55 (46, 64)    |
| SIADH                     | Endocrine      | 78 (67, 85)    | 80 (71, 86) | 74 (63, 82)    |
| T1DM                      | Endocrine      | 23 (12, 37)    | 21 (11, 37) | 24 (13, 38)    |
| T2DM                      | Endocrine      | 61 (51, 70)    | 63 (52, 73) | 60 (50, 69)    |
| Thyroid Disease           | Endocrine      | 52 (39, 66)    | 51 (38, 65) | 57 (43, 70)    |

|                            |               |             |               |             |
|----------------------------|---------------|-------------|---------------|-------------|
| Anterior Uveitis           | Eye           | 45 (32, 60) | 48 (34, 63)   | 42 (31, 57) |
| Blindness                  | Eye           | 68 (44, 81) | 73 (50, 83)   | 62 (38, 78) |
| Cataract                   | Eye           | 74 (66, 80) | 75 (67, 81)   | 72 (63, 79) |
| Diabetic Eye Disease       | Eye           | 64 (52, 73) | 66 (54, 75)   | 62 (51, 71) |
| Glaucoma                   | Eye           | 68 (58, 77) | 70 (60, 78)   | 66 (56, 75) |
| Keratitis                  | Eye           | 44 (29, 61) | 45 (29, 62)   | 43 (29, 59) |
| Macular Degeneration       | Eye           | 77 (69, 84) | 78 (70, 84)   | 76 (67, 82) |
| Posterior Uveitis          | Eye           | 40 (26, 56) | 40 (26, 56)   | 39 (26, 55) |
| Ptosis                     | Eye           | 55 (24, 71) | 57 (35, 72)   | 51 (10, 69) |
| Retinal Detachment         | Eye           | 58 (44, 67) | 60 (47, 68)   | 56 (41, 66) |
| Retinal Vascular Occlusion | Eye           | 69 (60, 78) | 72 (62, 80)   | 67 (58, 76) |
| Scleritis                  | Eye           | 45 (34, 57) | 46 (35, 58)   | 44 (32, 57) |
| AKI                        | Genitourinary | 79 (68, 87) | 81 (71, 88)   | 77 (66, 85) |
| BPH                        | Genitourinary | 66 (59, 74) | NA (NA, NA)   | 66 (59, 74) |
| Chronic Cystitis           | Genitourinary | 59 (41, 72) | 53 (36, 67)   | 69 (59, 77) |
| CKD                        | Genitourinary | 74 (68, 81) | 75 (68, 82)   | 74 (67, 80) |
| Dysmenorrhoea              | Genitourinary | 25 (17, 37) | 25 (17, 37)   | NA (NA, NA) |
| End Stage Renal Disease    | Genitourinary | 64 (45, 78) | 65 (45, 79)   | 63 (44, 77) |
| Endometrial Hyperplasia    | Genitourinary | 48 (41, 55) | 48 (41, 55)   | NA (NA, NA) |
| Endometriosis              | Genitourinary | 35 (29, 43) | 35 (29, 43)   | NA (NA, NA) |
| Erectile Dysfunction       | Genitourinary | 56 (46, 64) | NA (NA, NA)   | 56 (46, 64) |
| Female Infertility         | Genitourinary | 31 (27, 35) | 31 (27, 35)   | NA (NA, NA) |
| Glomerulonephritis         | Genitourinary | 67 (40, 81) | 70 (44, 82)   | 65 (38, 79) |
| Hydrocele                  | Genitourinary | 19 (2, 54)  | NA (NA, NA)   | 19 (2, 54)  |
| Male infertility           | Genitourinary | 34 (29, 38) | NA (NA, NA)   | 34 (29, 38) |
| Menorrhagia                | Genitourinary | 39 (29, 45) | 39 (29, 45)   | NA (NA, NA) |
| Neuropathic Bladder        | Genitourinary | 56 (41, 69) | 54 (40, 68)   | 58 (43, 70) |
| Obstruct/reflux uropathy   | Genitourinary | 49 (20, 70) | 43 (20, 67)   | 54 (21, 72) |
| Postcoital Bleeding        | Genitourinary | 34 (26, 42) | 34 (26, 42)   | NA (NA, NA) |
| Postmenopausal Bleeding    | Genitourinary | 57 (53, 64) | 57 (53, 64)   | NA (NA, NA) |
| Prolapse                   | Genitourinary | 57 (46, 67) | 57 (46, 67)   | NA (NA, NA) |
| Tubulo-interstitial Nephro | Genitourinary | 33 (22, 54) | 30 (22, 48)   | 53 (35, 68) |
| Undescended Testis         | Genitourinary | 3 (1, 9)    | NA (NA, NA)   | 3 (1, 9)    |
| Urinary Incontinence       | Genitourinary | 52 (40, 69) | 51 (40, 66)   | 66 (41, 78) |
| Urolithiasis               | Genitourinary | 45 (33, 58) | 43 (31, 57)   | 45 (34, 58) |
| Agranulocytosis            | Haem/Imm      | 54 (36, 67) | 53 (38, 66)   | 55 (32, 69) |
| Anaemia – other            | Haem/Imm      | 57 (35, 76) | 48 (32, 74)   | 69 (53, 79) |
| Aplastic Anaemia           | Haem/Imm      | 64 (45, 77) | 64 (44, 78)   | 65 (47, 77) |
| B12 def anaemia            | Haem/Imm      | 64 (46, 77) | 60 (43, 76)   | 69 (55, 78) |
| Folate Def Anaemia         | Haem/Imm      | 72 (52, 84) | 69 (46, 84)   | 74 (61, 84) |
| Hypersplenism              | Haem/Imm      | 47 (26, 64) | 46 (24, 65)   | 48 (28, 64) |
| Hyposplenism               | Haem/Imm      | 35 (19, 58) | 42 (21, 62)   | 31 (18, 54) |
| Immunodeficiency           | Haem/Imm      | 35 (7, 62)  | 39 (12, 63)   | 29 (4, 62)  |
| Iron Def Anaemia           | Haem/Imm      | 48 (32, 72) | 45 (31, 67)   | 66 (44, 77) |
| Other haemolytic anaemia   | Haem/Imm      | 29 (5, 55)  | 30 (12, 53)   | 26 (2, 59)  |
| Pri thrombocytopaenia      | Haem/Imm      | 38 (13, 64) | 37 (18, 63)   | 40 (8, 65)  |
| Sarcoidosis                | Haem/Imm      | 40 (31, 51) | 42 (32, 54)   | 38 (31, 48) |
| Sec Polycythaemia          | Haem/Imm      | 57 (46, 67) | 59 (47, 70)   | 56 (45, 66) |
| Sec Thrombocytopaenia      | Haem/Imm      | 56 (34, 72) | 48 (30, 69)   | 62 (43, 74) |
| Sickle Cell Disease        | Haem/Imm      | 18 (1, 34)  | 20 (1, 34)    | 15 (1, 33)  |
| Sickle Cell Trait          | Haem/Imm      | 27 (7, 36)  | 28 (17, 36)   | 19 (1, 38)  |
| Thalassaemia               | Haem/Imm      | 29 (16, 39) | 29 (19, 39)   | 27 (7, 40)  |
| Thalassaemia Trait         | Haem/Imm      | 29 (18, 40) | 29 (20.5, 38) | 30 (13, 44) |
| Thrombophilia              | Haem/Imm      | 38 (29, 51) | 36 (28, 47)   | 46 (33, 58) |
| Chronic Hepatitis          | Infections    | 38 (30, 47) | 35 (28, 46)   | 39 (31, 48) |
| Encephalitis               | Infections    | 45 (19, 67) | 47 (21, 68)   | 44 (17, 66) |
| HIV                        | Infections    | 36 (29, 43) | 33 (28, 40)   | 37 (30, 46) |
| ID-Bacterial               | Infections    | 51 (29, 74) | 50 (29, 76)   | 53 (30, 72) |
| ID-Fungal                  | Infections    | 58 (29, 76) | 50 (26, 75)   | 64 (42, 77) |
| ID-Parasitic               | Infections    | 34 (13, 54) | 30 (12, 51)   | 38 (16, 55) |
| ID-Viral                   | Infections    | 3 (1, 29)   | 7 (1, 34)     | 2 (1, 19)   |
| ID-Anorectal               | Infections    | 38 (28, 50) | 35 (25, 46.5) | 40 (29, 51) |
| ID-Bone                    | Infections    | 56 (36, 73) | 58 (37, 76)   | 55 (36, 70) |
| ID-Digestive               | Infections    | 46 (6, 72)  | 50 (14, 75)   | 41 (3, 69)  |
| ID-Eye                     | Infections    | 3 (0, 60)   | 9 (0, 70)     | 2 (0, 50)   |
| ID-Heart                   | Infections    | 54 (36, 70) | 60 (37.5, 75) | 52 (35, 68) |
| ID-Liver                   | Infections    | 43 (33, 55) | 40 (31, 55)   | 44 (35, 55) |
| ID-Male GU                 | Infections    | 37 (18, 58) | NA (NA, NA)   | 37 (18, 58) |

|                              |                 |               |                |                |
|------------------------------|-----------------|---------------|----------------|----------------|
| ID–Other GU                  | Infections      | 30 (23, 40)   | 29 (23, 39)    | 55 (29, 73)    |
| ID–Other nervous sys         | Infections      | 57 (36, 73)   | 59 (37, 76)    | 56 (35, 70)    |
| ID–Other organisms           | Infections      | 38 (5, 70)    | 40 (8, 71)     | 35 (4, 68)     |
| ID–Other organs              | Infections      | 28 (3, 58)    | 30 (5, 57)     | 21 (2, 58)     |
| ID–Skin                      | Infections      | 48 (26, 71)   | 53 (27, 76)    | 45 (26, 65)    |
| LRTI                         | Infections      | 63 (28, 80)   | 65 (32, 82)    | 61 (19, 77)    |
| Meningitis                   | Infections      | 26 (9, 38)    | 28 (17, 39)    | 23 (3, 38)     |
| PID                          | Infections      | 37 (29, 46)   | 37 (29, 46)    | NA (NA, NA)    |
| Rheumatic Fever              | Infections      | 44 (12, 73)   | 45 (12, 74)    | 44 (12, 71)    |
| Sepsis                       | Infections      | 64 (23, 79)   | 65 (32, 81)    | 62 (8, 77)     |
| Tuberculosis                 | Infections      | 24 (15, 36)   | 24 (16, 36)    | 25 (14.75, 37) |
| URTI                         | Infections      | 6 (2, 23)     | 8 (2, 26)      | 5 (2, 19)      |
| UTI                          | Infections      | 71 (44, 83)   | 70 (38, 84)    | 73 (56, 82)    |
| Ankylosing Spondylosis       | Musculoskeletal | 37 (28, 52)   | 42 (31, 58)    | 36 (27, 48)    |
| Carpal Tunnel Syndrome       | Musculoskeletal | 50 (39, 62)   | 49 (38, 60)    | 52 (42, 64)    |
| Collapsed Vertebra           | Musculoskeletal | 74 (62, 83)   | 76 (66, 84)    | 67 (49, 79)    |
| Enteropathic Arthropathy     | Musculoskeletal | 47.5 (34, 62) | 50 (37, 63)    | 43 (30, 60)    |
| Enthesopathy                 | Musculoskeletal | 48 (38, 59)   | 49 (39, 60)    | 48 (37, 58)    |
| Fibromatosis                 | Musculoskeletal | 62 (53, 69)   | 65 (57, 72)    | 60 (51, 68)    |
| Fracture – Hip               | Musculoskeletal | 80 (68, 87)   | 82 (73, 87)    | 73 (49, 84)    |
| Fracture – Wrist             | Musculoskeletal | 29 (12, 60)   | 54 (15, 69)    | 15 (11, 32)    |
| Giant Cell Arteritis         | Musculoskeletal | 71 (63, 78)   | 72 (63, 78)    | 70 (62, 77)    |
| Gout                         | Musculoskeletal | 59 (47, 71)   | 69 (58, 78)    | 56 (45, 67)    |
| Intervertebral Disc Disorder | Musculoskeletal | 46 (37, 59)   | 48 (37, 61)    | 45 (36, 57)    |
| Juvenile Arthritis           | Musculoskeletal | 11 (5, 15)    | 11 (5, 15)     | 11 (6, 15)     |
| Lupus Erythematosus          | Musculoskeletal | 43 (32, 56)   | 42 (31, 55)    | 46 (34, 59)    |
| Osteoarthritis               | Musculoskeletal | 61 (53, 71)   | 62 (53, 72)    | 60 (51, 69)    |
| Osteoporosis                 | Musculoskeletal | 71 (61, 80)   | 71 (62, 80)    | 70 (57, 80)    |
| Polymyalgia Rheumatica       | Musculoskeletal | 72 (64, 78)   | 72 (64, 79)    | 72 (65, 78)    |
| Psoriatic Arthritis          | Musculoskeletal | 46 (36, 57)   | 47 (36, 57)    | 45 (36, 56)    |
| Reactive Arthritis           | Musculoskeletal | 34 (22, 47)   | 38 (23, 51)    | 31 (21, 44)    |
| Rheumatoid Arthritis         | Musculoskeletal | 58 (45, 70)   | 57 (45, 71)    | 59 (46, 69)    |
| Scelroderma                  | Musculoskeletal | 53 (39, 65)   | 54 (40, 65)    | 50 (33, 62)    |
| Scoliosis                    | Musculoskeletal | 35 (16, 66)   | 39 (16, 71)    | 28 (15, 54)    |
| Sjogren Syndrome             | Musculoskeletal | 58 (48, 67)   | 58 (48, 67)    | 58 (47, 69)    |
| Spinal Stenosis              | Musculoskeletal | 67 (57, 76)   | 69 (58, 77)    | 65 (55, 75)    |
| Spondylolisthesis            | Musculoskeletal | 59 (43, 72)   | 63 (49, 74)    | 51 (37, 66)    |
| Spondylosis                  | Musculoskeletal | 57 (47, 68)   | 57 (47, 69)    | 56 (46, 66)    |
| Autonomic Neuropathy         | Neurological    | 54 (40, 67)   | 53 (38, 66)    | 56 (42, 68)    |
| Bells Syndrome               | Neurological    | 42 (27, 58)   | 41 (26, 60)    | 42 (28, 57)    |
| Cerebral Palsy               | Neurological    | 3 (1, 16)     | 4 (1, 19)      | 3 (1, 14)      |
| Chronic Fatigue Syndrome     | Neurological    | 42 (31, 53)   | 43 (31, 53)    | 41 (29, 52)    |
| Diabetic Neuropathy          | Neurological    | 66 (56, 76)   | 68 (56, 77)    | 66 (56, 75)    |
| Epilepsy                     | Neurological    | 25 (12, 48)   | 26 (13, 49)    | 25 (11, 47)    |
| Essential Tremor             | Neurological    | 65 (46, 74)   | 66 (49, 76)    | 63 (42, 73)    |
| Idiopathic Intracranial HTN  | Neurological    | 27 (20, 38)   | 28 (21, 37)    | 23 (12, 45.25) |
| Migraine                     | Neurological    | 32 (20, 44)   | 32 (22, 45)    | 29 (15, 43)    |
| Motor Neurone Disease        | Neurological    | 67 (53, 76)   | 68 (53.75, 77) | 65 (51, 75)    |
| Multiple Sclerosis           | Neurological    | 40 (31, 50)   | 40 (31, 49)    | 41 (32, 50)    |
| Myasthenia Gravis            | Neurological    | 58 (36, 71)   | 51 (31, 69)    | 62 (49, 73)    |
| Parkinsons Disease           | Neurological    | 74 (66, 81)   | 75 (66, 82)    | 73 (65, 80)    |
| Peripheral Neuropathy        | Neurological    | 55 (43, 67)   | 55 (42, 67)    | 56 (43, 67)    |
| Trigeminal Neuralgia         | Neurological    | 55 (43, 67)   | 54 (43, 67)    | 56 (43, 68)    |
| Congenital Septal Defect     | Perinatal       | 2 (0, 22)     | 2 (0, 25)      | 1 (0, 17)      |
| Downs Syndrome               | Perinatal       | 0 (0, 13)     | 0 (0, 24)      | 0 (0, 3)       |
| High Birth Weight            | Perinatal       | 0 (0, 0)      | 0 (0, 0)       | 0 (0, 0)       |
| Intrauterine Hypoxia         | Perinatal       | 0 (0, 0)      | 0 (0, 0)       | 0 (0, 0)       |
| Low Birth Weight             | Perinatal       | 0 (0, 0)      | 0 (0, 0)       | 0 (0, 0)       |
| Neonatal Jaundice            | Perinatal       | 0 (0, 0)      | 0 (0, 0)       | 0 (0, 0)       |
| Patent Ductus Arteriosus     | Perinatal       | 0 (0, 1)      | 0 (0, 2)       | 0 (0, 1)       |
| Post-term Delivery           | Perinatal       | 0 (0, 0)      | 0 (0, 0)       | 0 (0, 0)       |
| Premature Delivery           | Perinatal       | 0 (0, 0)      | 0 (0, 0)       | 0 (0, 0)       |
| Resp Distress Newborn        | Perinatal       | 0 (0, 0)      | 0 (0, 0)       | 0 (0, 0)       |
| Sepsis of the Newborn        | Perinatal       | 0 (0, 0)      | 0 (0, 0)       | 0 (0, 0)       |
| Spina Bifida                 | Perinatal       | 18 (2, 33)    | 18 (2, 35)     | 17 (2, 32)     |
| Alcohol Misuse               | Psychiatric     | 41 (30, 53)   | 41 (29, 52)    | 41 (31, 53)    |
| Anxiety                      | Psychiatric     | 38 (27, 51)   | 38 (27, 52)    | 37 (26, 50)    |
| Autism                       | Psychiatric     | 9 (5, 15)     | 11 (6, 18)     | 9 (5, 14)      |

|                            |             |               |               |             |
|----------------------------|-------------|---------------|---------------|-------------|
| Bipolar Affective Disorder | Psychiatric | 39 (29, 51)   | 39 (29, 51)   | 39 (28, 51) |
| Delirium                   | Psychiatric | 83 (74, 88)   | 84 (77, 90)   | 81 (71, 87) |
| Dementia                   | Psychiatric | 83 (77, 88)   | 84 (78, 89)   | 81 (75, 86) |
| Depression                 | Psychiatric | 37 (27, 50)   | 37 (26, 49)   | 39 (28, 50) |
| Eating Disorders           | Psychiatric | 21 (17, 28)   | 21 (17, 28)   | 22 (17, 32) |
| Hyperkinetic Disorders     | Psychiatric | 10 (7, 14)    | 11 (7, 17)    | 10 (7, 13)  |
| Intellectual Disability    | Psychiatric | 19 (8, 38)    | 20 (9, 41)    | 18 (8, 37)  |
| OCD                        | Psychiatric | 29 (21, 40)   | 30 (22, 40)   | 29 (20, 41) |
| Personality Disorder       | Psychiatric | 30 (22, 41)   | 31 (22, 42)   | 30 (22, 40) |
| Schizophrenia              | Psychiatric | 34 (25, 48)   | 40 (28, 56)   | 31 (23, 42) |
| Substance Misuse           | Psychiatric | 28 (21, 39)   | 31 (22, 47)   | 27 (21, 36) |
| Allergic/chronic Rhinitis  | Respiratory | 27 (13, 44)   | 30 (15, 46)   | 24 (11, 42) |
| Asbestosis                 | Respiratory | 70 (63, 78)   | 72 (58, 80)   | 70 (63, 77) |
| Aspiration Pneumonitis     | Respiratory | 78 (62, 87)   | 81 (66, 89)   | 76 (59, 85) |
| Asthma                     | Respiratory | 19 (6, 42)    | 25 (9, 45)    | 13 (5, 37)  |
| Bronchiectasis             | Respiratory | 64 (48, 75)   | 64 (48, 75)   | 65 (48, 75) |
| Chronic Sinusitis          | Respiratory | 42 (31, 55)   | 42 (31, 54)   | 43 (31, 56) |
| CPD                        | Respiratory | 66 (57, 76)   | 67 (57, 77)   | 66 (58, 75) |
| Hypertroph Nasal Turbs     | Respiratory | 34 (21, 47)   | 34 (20, 48)   | 33 (22, 46) |
| Nasal Polyps               | Respiratory | 46 (33, 58)   | 44 (31, 57)   | 46 (34, 58) |
| Pleural Effusion           | Respiratory | 72 (57, 83)   | 75 (59, 85)   | 70 (56, 81) |
| Pleural Plaque             | Respiratory | 73 (65, 81)   | 76.5 (66, 85) | 73 (65, 80) |
| Pneumothorax               | Respiratory | 31 (21, 56)   | 38 (24, 62)   | 29 (21, 53) |
| Pulmonary Collapse         | Respiratory | 67 (50, 79)   | 69 (52, 81)   | 65 (48, 76) |
| Pulmonary Fibrosis         | Respiratory | 74 (64, 82)   | 75 (64, 82)   | 74 (65, 81) |
| Respiratory Failure        | Respiratory | 73 (61, 82)   | 75 (62, 84)   | 71 (60, 81) |
| Sleep apnoea               | Respiratory | 48 (33, 59)   | 46 (12, 58)   | 48 (35, 59) |
| Acne                       | Skin        | 18 (15, 26)   | 20 (15, 29)   | 17 (15, 21) |
| Actinic keratosis          | Skin        | 68 (59, 76)   | 68 (58, 77)   | 68 (60, 76) |
| Alopecia Areata            | Skin        | 30 (18, 42)   | 32 (19, 45)   | 29 (17, 39) |
| Dermatitis                 | Skin        | 24 (3, 47)    | 27 (5, 47)    | 19 (2, 46)  |
| Hidradenitis               | Skin        | 34 (26, 44)   | 33 (25, 42)   | 37 (28, 47) |
| Lichen Planus              | Skin        | 53 (39.5, 64) | 55 (43, 65)   | 48 (36, 60) |
| Pilonidal cyst/sinus       | Skin        | 25 (20, 34)   | 23 (19, 31)   | 27 (22, 35) |
| Psoriasis                  | Skin        | 37 (23, 54)   | 36 (22, 55)   | 38 (25, 53) |
| Rosacea                    | Skin        | 45 (33, 58)   | 44 (33, 55)   | 48 (33, 61) |
| Seborrheic Dermatitis      | Skin        | 33 (13, 53)   | 33 (13, 53)   | 33 (11, 54) |
| Urticaria                  | Skin        | 28 (8, 47)    | 31 (12, 49)   | 19 (6, 43)  |
| Vitiligo                   | Skin        | 33 (17, 48)   | 34 (19, 49)   | 31 (15, 47) |



**Supplementary Table S7B.** Median (interquartile range) age of first record for 308 medical conditions by ethnicity.

| Disease                  | Category       | All ethnicities | Black               | South Asian         | White         |
|--------------------------|----------------|-----------------|---------------------|---------------------|---------------|
| Benign Neo – Brain       | Benign Neo     | 55 (41, 69)     | 45 (34.75, 59)      | 49 (34, 60)         | 56 (42, 70)   |
| Benign Neo – Colon       | Benign Neo     | 63 (52, 72)     | 58.5 (46, 69)       | 59 (47, 68)         | 63 (53, 72)   |
| Benign Neo – Ovary       | Benign Neo     | 36 (27, 47)     | 34 (27, 41)         | 34 (27, 42)         | 37 (27, 47)   |
| Benign Neo – Stomach     | Benign Neo     | 66 (56, 75)     | 64.5 (52.75, 73)    | 62 (49, 73)         | 66 (56, 75)   |
| Benign Neo – Uterus      | Benign Neo     | 52 (44, 61)     | 44 (37, 52)         | 47 (38, 56)         | 53 (45, 62)   |
| CIN                      | Benign Neo     | 31 (26, 39)     | 33 (27, 39)         | 35 (28, 43)         | 31 (26, 39)   |
| Haemangioma              | Benign Neo     | 34 (3, 53)      | 23 (1, 44)          | 21 (1, 43)          | 36 (4, 55)    |
| Leiomyoma                | Benign Neo     | 46 (40, 51)     | 40 (34, 45)         | 43 (37, 48)         | 47 (41, 52)   |
| Hodgkins Lymphoma        | Cancers        | 34 (23, 53)     | 34.5 (22.25, 46.5)  | 30.5 (20.5, 46.25)  | 35 (24, 55)   |
| Leukaemia                | Cancers        | 64 (47, 76)     | 43.5 (30, 59.25)    | 45 (12, 66)         | 65 (50, 76)   |
| MGUS                     | Cancers        | 72 (63, 80)     | 64 (51.5, 76)       | 67 (54, 76)         | 73 (64, 80)   |
| Myelodysplastic Syndrome | Cancers        | 76 (66, 83)     | 57 (41, 72)         | 65.5 (43.25, 75.75) | 77 (67, 84)   |
| Non Hodgkins Lymphoma    | Cancers        | 62 (48, 73)     | 48 (36, 62.5)       | 49 (34.25, 65)      | 63 (50, 74)   |
| Plasma Cell Ca           | Cancers        | 70 (61, 79)     | 63 (53, 75)         | 59 (49.5, 73.5)     | 71 (61, 79)   |
| Polycythaemia vera       | Cancers        | 58 (47, 69)     | 49 (36.25, 59.75)   | 42 (29, 57)         | 59 (48, 70)   |
| Pri Ca – Biliary         | Cancers        | 72 (63, 81)     | 72 (61, 74)         | 71 (61.5, 80.75)    | 72 (63, 81)   |
| Pri Ca – Bladder         | Cancers        | 71 (62, 78)     | 67 (48, 75)         | 61.5 (51, 70)       | 71 (62, 79)   |
| Pri Ca – Bone            | Cancers        | 49 (25, 69)     | 31 (15.25, 54.5)    | 46 (26.5, 65.75)    | 51 (27, 69)   |
| Pri Ca – Bowel           | Cancers        | 69 (60, 78)     | 63 (51, 73)         | 65 (54, 73.5)       | 70 (61, 78)   |
| Pri Ca – Brain           | Cancers        | 52 (28, 68)     | 46 (18.25, 66)      | 40.5 (22, 53.25)    | 54 (30, 69)   |
| Pri Ca – Breast          | Cancers        | 59 (50, 68)     | 51 (44, 62)         | 53 (45, 62)         | 59 (50, 69)   |
| Pri Ca – Cervix          | Cancers        | 41 (34, 54)     | 47 (35, 56.25)      | 51 (39, 61.5)       | 41 (34, 54)   |
| Pri Ca – Kidney          | Cancers        | 67 (57, 76)     | 62 (46, 70)         | 64 (50.5, 72)       | 68 (58, 77)   |
| Pri Ca – Liver           | Cancers        | 69 (60, 77)     | 54.5 (47.5, 69.25)  | 61 (55.5, 74.5)     | 70 (61, 78)   |
| Pri Ca – Lung            | Cancers        | 71 (64, 79)     | 63 (51.75, 75)      | 69 (58.5, 76)       | 71 (64, 79)   |
| Pri Ca – Melanoma        | Cancers        | 57 (42.75, 70)  | 50 (31, 66)         | 55.5 (39, 62.75)    | 58 (44, 71)   |
| Pri Ca – Mesothelioma    | Cancers        | 72 (65, 79)     | 76 (70, 78.75)      | 66.5 (61.75, 71.25) | 73 (66, 79)   |
| Pri Ca – Multiple Sites  | Cancers        | 74 (66, 83)     | 69 (66, 80)         | NA (NA, NA)         | 74.5 (66, 83) |
| Pri Ca – Oesophageal     | Cancers        | 70 (62, 79)     | 64 (58, 77)         | 66 (58, 78)         | 71 (62, 79)   |
| Pri Ca – Oropharyngeal   | Cancers        | 61 (51, 71)     | 50 (38.75, 62.5)    | 55 (41, 64)         | 62 (52, 72)   |
| Pri Ca – other           | Cancers        | 65 (51, 76)     | 48 (37, 63)         | 54 (31.5, 67)       | 65 (53, 76)   |
| Pri Ca – Ovary           | Cancers        | 61 (49, 71)     | 52 (44, 66)         | 53.5 (42, 66.75)    | 62 (50, 72)   |
| Pri Ca – Pancreas        | Cancers        | 72 (63, 81)     | 66.5 (53.25, 76.75) | 68 (62.5, 74)       | 73 (63, 81)   |
| Pri Ca – Prostate        | Cancers        | 71 (64, 77)     | 68 (60, 74)         | 69.5 (63, 75)       | 71 (65, 78)   |
| Pri Ca – Skin            | Cancers        | 68 (57, 77)     | 59.5 (46.25, 73)    | 55 (41, 67)         | 68 (58, 77)   |
| Pri Ca – Stomach         | Cancers        | 72 (62, 79)     | 67 (55.5, 73.25)    | 65 (51, 75)         | 72 (63, 80)   |
| Pri Ca – Testis          | Cancers        | 34 (28, 42)     | 33 (23.5, 39.75)    | 32 (23, 42.25)      | 35 (28, 43)   |
| Pri Ca – Thyroid         | Cancers        | 47 (35, 61)     | 43.5 (37, 53.75)    | 39 (33, 50)         | 48 (36, 63)   |
| Pri Ca – Uterus          | Cancers        | 64 (57, 72)     | 64 (55.5, 70)       | 62 (54, 69)         | 65 (57, 73)   |
| Sec Ca – Adrenal         | Cancers        | 69 (61, 77)     | 58 (52.5, 65.5)     | 67.5 (62.75, 70)    | 69 (62, 77)   |
| Sec Ca – Bone            | Cancers        | 71 (62, 80)     | 67.5 (54, 76.75)    | 65 (52, 73)         | 71 (62, 80)   |
| Sec Ca – Bowel           | Cancers        | 68 (60, 77)     | 59 (52.5, 74)       | 67 (55, 72)         | 68 (60, 77)   |
| Sec Ca – Brain           | Cancers        | 67 (57, 76)     | 53 (47.75, 61.5)    | 60 (51, 70)         | 67 (58, 76)   |
| Sec Ca – Liver           | Cancers        | 70 (61, 79)     | 65 (52, 76)         | 64 (54, 72)         | 71 (62, 79)   |
| Sec Ca – Lung            | Cancers        | 70 (60, 79)     | 60 (50, 74)         | 61.5 (48, 70.25)    | 70 (61, 79)   |
| Sec Ca – Lymph Nodes     | Cancers        | 63 (53, 73)     | 53.5 (46, 65.75)    | 57 (46, 66)         | 64 (53, 73)   |
| Sec Ca – other           | Cancers        | 70 (60, 80)     | 64.5 (53.75, 76.25) | 62.5 (51.75, 69)    | 70 (60, 80)   |
| Sec Ca – Peritoneum      | Cancers        | 68 (59, 76)     | 61 (51.25, 73)      | 61 (51, 69)         | 68 (59, 76)   |
| Sec Ca – Pleura          | Cancers        | 70 (61, 79)     | 56 (49, 64)         | 61.5 (54.75, 71)    | 71 (62, 79)   |
| AAA                      | Cardiovascular | 74 (66, 81)     | 66 (54, 74.5)       | 67 (57.5, 75)       | 74 (66, 81)   |
| Atrial Fibrillation      | Cardiovascular | 74 (65, 82)     | 67 (53, 77)         | 69 (59, 77)         | 75 (65, 82)   |
| AV Block, first degree   | Cardiovascular | 80 (71, 86)     | 70 (49, 78)         | 76 (66, 82)         | 80 (71, 87)   |
| AV Block, second degree  | Cardiovascular | 76 (65, 83)     | 65 (44.5, 77)       | 72 (56, 79)         | 76 (66, 83)   |
| AV Block, third          | Cardiovascular | 77 (68, 84)     | 73 (52.5, 80)       | 66.5 (55.75, 74)    | 78 (68, 85)   |

|                           |                |                |                   |                   |               |
|---------------------------|----------------|----------------|-------------------|-------------------|---------------|
| degree                    |                |                |                   |                   |               |
| Bifascicular Block        | Cardiovascular | 82 (73, 87)    | 74.5 (67.75, 79)  | 76 (71.25, 83.5)  | 82 (74, 88)   |
| Cardiomyopathy – other    | Cardiovascular | 61 (49, 72)    | 50 (37, 61.5)     | 61 (42.75, 73)    | 62 (50, 73)   |
| CHD – nos                 | Cardiovascular | 70 (60, 79)    | 61 (52, 73)       | 62 (51.75, 71)    | 71 (61, 80)   |
| Dilated cardiomyopathy    | Cardiovascular | 60 (49, 70)    | 48 (39.75, 60)    | 54 (38, 66)       | 61 (50, 71)   |
| Heart Failure             | Cardiovascular | 76 (66, 84)    | 66 (51, 76)       | 70 (60, 78)       | 77 (67, 84)   |
| HOCM                      | Cardiovascular | 57 (43, 70)    | 52 (37.25, 65)    | 46 (34.25, 64.25) | 59 (45, 71)   |
| Hypertension              | Cardiovascular | 59 (49, 69)    | 48 (40, 58)       | 53 (44, 63)       | 60 (51, 70)   |
| Intracerebral Haemorrhage | Cardiovascular | 70 (56, 81)    | 53 (41.25, 69)    | 58 (43, 70)       | 71 (57, 81)   |
| Ischaemic Stroke          | Cardiovascular | 74 (63, 83)    | 63 (49, 75)       | 67 (53, 76)       | 74 (64, 83)   |
| LBBB                      | Cardiovascular | 77 (67, 85)    | 68 (54.5, 79)     | 71 (60, 79)       | 78 (67, 85)   |
| Multiple valve disorder   | Cardiovascular | 77 (67, 84)    | 66 (50, 75)       | 70 (55.75, 77)    | 78 (68, 85)   |
| Myocardial Infarction     | Cardiovascular | 65 (55, 76)    | 62 (50, 75)       | 60 (50, 71)       | 66 (55, 77)   |
| Non-rheum Aortic valve dz | Cardiovascular | 74 (63, 82)    | 66 (46, 77)       | 67 (51, 76.5)     | 75 (64, 82)   |
| Non-rheum Mitral valve dz | Cardiovascular | 68 (53, 78)    | 47 (35, 66)       | 58 (41, 71)       | 69 (55, 79)   |
| PAD                       | Cardiovascular | 68 (59, 77)    | 67 (55, 75)       | 65 (54, 74)       | 68 (59, 77)   |
| Pericardial Effusion      | Cardiovascular | 66 (50.25, 77) | 47.5 (27, 69)     | 52 (28.5, 69.5)   | 67 (53, 78)   |
| Pri Pulmonary HTN         | Cardiovascular | 74 (60, 82)    | 50 (34.75, 72)    | 56 (12, 72)       | 74 (62, 83)   |
| Pulmonary Embolism        | Cardiovascular | 62 (46, 75)    | 48 (36, 65)       | 47.5 (31, 66)     | 63 (47, 75)   |
| Raynauds Disease          | Cardiovascular | 44 (29, 60)    | 38 (27, 49)       | 37 (25, 52)       | 46 (31, 62)   |
| RBBB                      | Cardiovascular | 75 (61, 84)    | 67.5 (47, 78)     | 69 (53, 77)       | 76 (62, 84)   |
| Rheum Valve dz            | Cardiovascular | 70 (54, 80)    | 53 (36, 67)       | 50 (33.25, 69)    | 71 (56, 81)   |
| Sec Pulmonary HTN         | Cardiovascular | 77 (65, 84)    | 62 (44, 75)       | 69 (42, 77)       | 78 (67, 84.5) |
| Sick Sinus Syndrome       | Cardiovascular | 75 (65, 83)    | 61 (39, 73.5)     | 69 (52.5, 78)     | 76 (66, 83)   |
| Stable Angina             | Cardiovascular | 64 (55, 73)    | 62 (51.75, 71)    | 59 (51, 67)       | 64 (56, 73)   |
| Stroke – nos              | Cardiovascular | 72 (61, 81)    | 63 (50, 72)       | 62 (53, 73)       | 72 (61, 81)   |
| Subarach Haemorrhage      | Cardiovascular | 51 (40, 65)    | 46 (36, 55.25)    | 47 (34.75, 59)    | 52 (40, 66)   |
| Subdural haematoma        | Cardiovascular | 76 (61, 84)    | 69.5 (47.5, 78)   | 68 (44, 79)       | 77 (63, 85)   |
| SVT                       | Cardiovascular | 57 (39, 71)    | 45.5 (30.25, 64)  | 45 (31, 62)       | 58 (40, 71)   |
| TIA                       | Cardiovascular | 70 (61, 79)    | 64 (51, 73)       | 64 (55, 74)       | 71 (61, 79)   |
| Trifascicular Block       | Cardiovascular | 82 (76, 87)    | 73.5 (69, 83.5)   | 78 (72, 79)       | 82 (76, 87)   |
| Unstable Angina           | Cardiovascular | 66 (57, 76)    | 64 (50, 74)       | 61 (52, 70)       | 67 (57, 77)   |
| Ventricular Tachycardia   | Cardiovascular | 66 (54, 76)    | 52 (39, 69)       | 57 (41, 71.5)     | 66 (54, 77)   |
| VTE (Excl PE)             | Cardiovascular | 58 (41, 72)    | 46 (35, 61)       | 47 (31, 63)       | 59 (42, 73)   |
| Abdominal Hernia          | Digestive      | 46 (23, 62)    | 23 (1, 42)        | 39 (13.75, 55.25) | 48 (28, 63)   |
| Alcoholic Liver Disease   | Digestive      | 52 (43, 61)    | 45 (41, 55.5)     | 48 (38.25, 56)    | 52 (43, 61)   |
| Anal Fissure              | Digestive      | 34 (23, 47)    | 33 (23, 41)       | 32 (24, 42)       | 35 (24, 49)   |
| Angiodysplasia of colon   | Digestive      | 70 (61, 79)    | 69 (57, 74.25)    | 61 (53, 73)       | 71 (62, 79)   |
| Anorectal Fistula         | Digestive      | 40 (30, 51)    | 38 (31, 46)       | 36.5 (30, 46)     | 41 (30, 52)   |
| Anorectal Prolapse        | Digestive      | 60 (40, 75)    | 45.5 (37, 62)     | 50 (36, 62)       | 62 (43, 76)   |
| Appendicitis              | Digestive      | 19 (13, 30)    | 23 (15, 33)       | 21 (14, 30)       | 20 (13, 31)   |
| Autoimmune liver disease  | Digestive      | 57 (45, 68)    | 45 (38, 54)       | 47 (34.5, 58)     | 58.5 (46, 69) |
| Barretts Oesophagus       | Digestive      | 64 (54, 74)    | 67 (51.25, 75.25) | 61 (50, 71)       | 65 (54, 74)   |
| Cholangitis               | Digestive      | 70 (55, 81)    | 46 (33, 57)       | 60 (40.75, 76)    | 71 (56, 81)   |
| Cholecystitis             | Digestive      | 53 (40, 67)    | 42 (33, 54)       | 48 (35, 61)       | 54 (40, 67)   |
| Cholelithiasis            | Digestive      | 55 (41, 68)    | 41 (32, 54)       | 46 (34, 60)       | 56 (42, 69)   |
| Cirrhosis                 | Digestive      | 54 (44, 64)    | 51 (42, 61)       | 51 (38.5, 60)     | 55 (45, 65)   |
| Coeliac Disease           | Digestive      | 41 (23, 57)    | 29.5 (7, 43.75)   | 34 (19, 47)       | 43 (24, 59)   |
| Crohns Disease            | Digestive      | 35 (24, 52)    | 33 (23, 42)       | 32 (23, 45)       | 35 (24, 53)   |
| Diaphragmatic Hernia      | Digestive      | 60 (47, 71)    | 49 (40, 64)       | 52 (40, 65)       | 60 (48, 71)   |
| Diverticular Disease      | Digestive      | 67 (57, 75)    | 63 (52, 73)       | 64 (55, 72)       | 67 (58, 75)   |
| Fatty Liver               | Digestive      | 54 (43, 64)    | 46 (38.25, 54)    | 47 (36, 57)       | 55 (44, 65)   |
| Gastritis                 | Digestive      | 51 (35, 66)    | 42 (31, 55)       | 43 (30, 59)       | 53 (37, 67)   |
| GORD                      | Digestive      | 50 (34, 64)    | 41 (30, 53)       | 40 (28, 55)       | 51 (35, 65)   |
| IBS                       | Digestive      | 37 (27, 51)    | 35 (27, 44)       | 34 (26, 44)       | 38 (27, 52)   |
| Liver Failure             | Digestive      | 57 (45, 69.75) | 50 (35.5, 68.5)   | 55 (35, 69.75)    | 58 (45, 70)   |
| Oesophageal Ulcer         | Digestive      | 53 (40, 66)    | 44 (34, 57)       | 45 (33, 59)       | 55 (41, 67)   |

|                            |               |               |                     |                   |               |
|----------------------------|---------------|---------------|---------------------|-------------------|---------------|
| Oesophageal Varices        | Digestive     | 57 (47, 67)   | 53 (43, 66.75)      | 52 (40, 60)       | 57 (47, 67)   |
| Pancreatitis               | Digestive     | 53 (38, 67)   | 43 (34, 56)         | 46 (33, 60)       | 54 (39, 68)   |
| Peptic Ulcer               | Digestive     | 51 (36, 67)   | 41 (31, 56)         | 47 (34, 62)       | 53 (38, 68)   |
| Peritonitis                | Digestive     | 52 (32, 69)   | 42 (26.5, 55)       | 40 (23, 56)       | 53 (33, 70)   |
| Portal Hypertension        | Digestive     | 56 (46, 66)   | 47.5 (37, 62.25)    | 54 (41, 63)       | 56 (47, 66)   |
| Ulcerative Colitis         | Digestive     | 41 (29, 57)   | 37.5 (29, 48.25)    | 34 (25, 45)       | 42 (29, 59)   |
| Volvulus                   | Digestive     | 65 (48, 78)   | 53 (35, 74)         | 55 (41, 73)       | 66 (50, 79)   |
| Deafness                   | Ear           | 52 (23, 70)   | 37 (10, 56.5)       | 40 (12, 61)       | 55 (28, 72)   |
| Menieres Disease           | Ear           | 55 (44, 67)   | 48 (40, 61)         | 49 (40, 59.75)    | 57 (45, 68)   |
| Tinnitus                   | Ear           | 53 (41, 64)   | 48 (37, 61)         | 48 (36, 60)       | 55 (42, 65)   |
| Cystic Fibrosis            | Endocrine     | 30 (2, 45)    | 9.5 (0, 32.75)      | 8 (0, 37)         | 29 (2, 45)    |
| DM – other or nos          | Endocrine     | 57 (41, 71)   | 45 (35, 55)         | 45 (34, 58)       | 60 (42, 73)   |
| Hyperparathyroidism        | Endocrine     | 67 (54, 77.5) | 56 (43, 72)         | 56 (45.75, 71)    | 68 (56, 78)   |
| Low HDL                    | Endocrine     | 57 (46, 67)   | 47 (40, 58)         | 47 (38, 58)       | 59 (48, 68)   |
| Obesity                    | Endocrine     | 45 (33, 58)   | 40 (32, 48)         | 39 (30, 51)       | 47 (34, 59)   |
| PCOS                       | Endocrine     | 27 (22, 32)   | 29 (24, 33)         | 27 (23, 31)       | 27 (23, 32)   |
| Raised LDL                 | Endocrine     | 57 (48, 66)   | 48 (42, 58)         | 48 (40, 57)       | 59 (49, 67)   |
| Raised Total Cholesterol   | Endocrine     | 56 (47, 65)   | 48 (42, 58)         | 47 (39, 56)       | 57 (48, 66)   |
| Raised Triglycerides       | Endocrine     | 57 (48, 66)   | 50 (42, 60)         | 48 (40, 58)       | 58 (49, 67)   |
| SIADH                      | Endocrine     | 78 (67, 85)   | 59 (50, 76)         | 74 (62.5, 79.5)   | 78 (67, 85)   |
| T1DM                       | Endocrine     | 23 (12, 37)   | 29 (14, 41)         | 26 (13, 40)       | 23 (12, 37)   |
| T2DM                       | Endocrine     | 61 (51, 70)   | 52 (44, 63)         | 52 (43, 61)       | 63 (53, 72)   |
| Thyroid Disease            | Endocrine     | 52 (39, 66)   | 42 (33, 53)         | 40 (30, 53)       | 54 (40, 68)   |
| Anterior Uveitis           | Eye           | 45 (32, 60)   | 44 (32, 58)         | 44 (32, 58)       | 47 (33, 62)   |
| Blindness                  | Eye           | 68 (44, 81)   | 52 (32, 73)         | 51 (26, 69)       | 70 (48, 82)   |
| Cataract                   | Eye           | 74 (66, 80)   | 67 (58, 73.5)       | 66 (58, 72)       | 75 (67, 81)   |
| Diabetic Eye Disease       | Eye           | 64 (52, 73)   | 58 (48, 69)         | 57 (49, 67)       | 65 (54, 74)   |
| Glaucoma                   | Eye           | 68 (58, 77)   | 59 (48, 69)         | 62 (51, 70)       | 69 (59, 78)   |
| Keratitis                  | Eye           | 44 (29, 61)   | 37 (22, 49)         | 32 (22, 47)       | 47 (31, 63)   |
| Macular Degeneration       | Eye           | 77 (69, 84)   | 67 (55, 75)         | 64 (53, 73)       | 78 (70, 84)   |
| Posterior Uveitis          | Eye           | 40 (26, 56)   | 36 (30.25, 44)      | 44 (29, 54)       | 41 (26, 57)   |
| Ptoisis                    | Eye           | 55 (24, 71)   | 36 (5.5, 53.5)      | 36 (10, 59)       | 58 (31, 72)   |
| Retinal Detachment         | Eye           | 58 (44, 67)   | 48 (36, 60)         | 53 (33, 63)       | 59 (46, 68)   |
| Retinal Vascular Occlusion | Eye           | 69 (60, 78)   | 62 (49, 71)         | 61 (52, 70)       | 70 (61, 79)   |
| Scleritis                  | Eye           | 45 (34, 57)   | 40 (31, 48)         | 38 (27, 48)       | 47 (36, 59)   |
| AKI                        | Genitourinary | 79 (68, 87)   | 64 (47, 77)         | 72 (57, 80)       | 80 (69, 87)   |
| BPH                        | Genitourinary | 66 (59, 74)   | 63 (54, 71)         | 64 (56, 72)       | 67 (60, 74)   |
| Chronic Cystitis           | Genitourinary | 59 (41, 72)   | 46 (35, 55)         | 48 (32, 61.25)    | 61 (42, 73)   |
| CKD                        | Genitourinary | 74 (68, 81)   | 68 (58, 76)         | 70 (62, 76)       | 75 (68, 81)   |
| Dysmenorrhoea              | Genitourinary | 25 (17, 37)   | 27 (18, 37)         | 26 (19, 36)       | 26 (17, 38)   |
| End Stage Renal Disease    | Genitourinary | 64 (45, 78)   | 53 (39, 67)         | 56 (39.75, 69.25) | 66 (46, 79)   |
| Endometrial Hyperplasia    | Genitourinary | 48 (41, 55)   | 42 (36, 48)         | 44 (37, 49.25)    | 48 (41, 56)   |
| Endometriosis              | Genitourinary | 35 (29, 43)   | 36 (30, 42)         | 35 (30, 42)       | 35 (29, 43)   |
| Erectile Dysfunction       | Genitourinary | 56 (46, 64)   | 50 (41, 60)         | 49 (38, 58)       | 57 (48, 65)   |
| Female Infertility         | Genitourinary | 31 (27, 35)   | 34 (29, 38)         | 30 (27, 35)       | 31 (27, 35)   |
| Glomerulonephritis         | Genitourinary | 67 (40, 81)   | 45 (31, 64)         | 41 (22, 66)       | 70 (46, 81.5) |
| Hydrocele                  | Genitourinary | 19 (2, 54)    | 21 (3, 51)          | 7 (0, 41)         | 23 (3, 58)    |
| Male infertility           | Genitourinary | 34 (29, 38)   | 37 (32, 41)         | 33 (30, 37)       | 33 (29, 38)   |
| Menorrhagia                | Genitourinary | 39 (29, 45)   | 38 (30, 43)         | 36 (28, 44)       | 39 (29, 45)   |
| Neuropathic Bladder        | Genitourinary | 56 (41, 69)   | 46 (37, 58)         | 48 (36, 61)       | 57 (43, 70)   |
| Obstruct/reflux uropathy   | Genitourinary | 49 (20, 70)   | 39 (21, 54)         | 34 (5, 53)        | 52 (24, 72)   |
| Postcoital Bleeding        | Genitourinary | 34 (26, 42)   | 35 (28, 43)         | 33 (27, 40)       | 34 (26, 42)   |
| Postmenopausal Bleeding    | Genitourinary | 57 (53, 64)   | 55 (51, 60)         | 55 (52, 61)       | 57 (53, 64)   |
| Prolapse                   | Genitourinary | 57 (46, 67)   | 47 (38, 60)         | 49 (40, 59.25)    | 57 (47, 68)   |
| Tubulo-interstitial Nephro | Genitourinary | 33 (22, 54)   | 33 (24, 43)         | 35 (25, 51)       | 34 (22, 55)   |
| Undescended Testis         | Genitourinary | 3 (1, 9)      | 2 (1, 7)            | 1 (0, 6)          | 3 (1, 9)      |
| Urinary Incontinence       | Genitourinary | 52 (40, 69)   | 45 (33, 59)         | 46 (34, 59)       | 54 (41, 70)   |
| Urolithiasis               | Genitourinary | 45 (33, 58)   | 42 (33.75, 52)      | 39 (30, 50)       | 46 (34, 59)   |
| Agranulocytosis            | Haem/Imm      | 54 (36, 67)   | 40 (28, 52)         | 37 (15.75, 55)    | 57 (39, 68)   |
| Anaemia – other            | Haem/Imm      | 57 (35, 76)   | 39 (29, 51)         | 37 (26, 57)       | 63 (39, 78)   |
| Aplastic Anaemia           | Haem/Imm      | 64 (45, 77)   | 44.5 (30.75, 66.25) | 44 (22, 65)       | 66 (49, 78)   |
| B12 def anaemia            | Haem/Imm      | 64 (46, 77)   | 46 (39, 66.5)       | 51 (38, 64)       | 66 (48, 78)   |
| Folate Def Anaemia         | Haem/Imm      | 72 (52, 84)   | 48 (41, 66)         | 46 (32, 65.25)    | 73 (55, 84)   |

|                              |                 |               |                     |                  |                 |
|------------------------------|-----------------|---------------|---------------------|------------------|-----------------|
| Hypersplenism                | Haem/Imm        | 47 (26, 64)   | 25 (5, 38)          | 39 (22.5, 55)    | 50 (29, 66)     |
| Hyposplenism                 | Haem/Imm        | 35 (19, 58)   | 35 (18.75, 49)      | 35.5 (22.75, 53) | 38 (19, 60.5)   |
| Immunodeficiency             | Haem/Imm        | 35 (7, 62)    | 32 (10, 43)         | 11 (2, 41)       | 39 (8, 65)      |
| Iron Def Anaemia             | Haem/Imm        | 48 (32, 72)   | 38 (27, 46)         | 34 (23, 48)      | 53 (36, 75)     |
| Other haemolytic anaemia     | Haem/Imm        | 29 (5, 55)    | 29 (5, 41)          | 26 (6, 36)       | 32.5 (7, 63)    |
| Pri thrombocytopaenia        | Haem/Imm        | 38 (13, 64)   | 39 (29, 51)         | 34.5 (19, 54)    | 42 (15, 66)     |
| Sarcoidosis                  | Haem/Imm        | 40 (31, 51)   | 39 (31, 47)         | 43 (34, 52)      | 40 (31, 52)     |
| Sec Polycythaemia            | Haem/Imm        | 57 (46, 67)   | 51.5 (28, 66.75)    | 45 (32, 56.5)    | 58 (47, 68)     |
| Sec Thrombocytopaenia        | Haem/Imm        | 56 (34, 72)   | 39 (29, 55)         | 39 (26, 60)      | 59 (36, 74)     |
| Sickle Cell Disease          | Haem/Imm        | 18 (1, 34)    | 11 (1, 30)          | 26 (4, 34)       | 39 (16.5, 59.5) |
| Sickle Cell Trait            | Haem/Imm        | 27 (7, 36)    | 28 (11.75, 37)      | 27 (12.5, 33)    | 25 (5, 37.25)   |
| Thalassaemia                 | Haem/Imm        | 29 (16, 39)   | 29 (12, 39)         | 28 (16, 36)      | 30.5 (18, 45)   |
| Thalassaemia Trait           | Haem/Imm        | 29 (18, 40)   | 34 (25.5, 43)       | 28 (17, 38)      | 30 (19, 44)     |
| Thrombophilia                | Haem/Imm        | 38 (29, 51)   | 39.5 (31.25, 47.75) | 34 (29, 43)      | 38 (29, 52)     |
| Chronic Hepatitis            | Infections      | 38 (30, 47)   | 36 (29, 46)         | 37 (29, 48)      | 39 (30, 48)     |
| Encephalitis                 | Infections      | 45 (19, 67)   | 17.5 (5.75, 43.25)  | 23 (7, 48)       | 48 (23, 68.75)  |
| HIV                          | Infections      | 36 (29, 43)   | 34 (28, 41)         | 35.5 (31, 44.75) | 38 (30, 46)     |
| ID-Bacterial                 | Infections      | 51 (29, 74)   | 36 (22, 49)         | 35 (21, 54)      | 54 (31, 75)     |
| ID-Fungal                    | Infections      | 58 (29, 76)   | 34 (20, 48.5)       | 32 (21, 61)      | 60 (31, 77)     |
| ID-Parasitic                 | Infections      | 34 (13, 54)   | 36 (23, 45)         | 29 (9.5, 45)     | 34 (13, 58)     |
| ID-Viral                     | Infections      | 3 (1, 29)     | 4 (1, 28)           | 3 (1, 17)        | 4 (1, 31)       |
| ID-Anorectal                 | Infections      | 38 (28, 50)   | 34 (24, 43)         | 33 (25, 44)      | 39 (28, 50)     |
| ID-Bone                      | Infections      | 56 (36, 73)   | 38 (20, 55)         | 43 (26, 62)      | 58 (39, 74)     |
| ID-Digestive                 | Infections      | 46 (6, 72)    | 32 (4, 50)          | 28 (3, 54)       | 50 (7, 74)      |
| ID-Eye                       | Infections      | 3 (0, 60)     | 5 (0, 33.25)        | 2 (0, 24.5)      | 4 (0, 65)       |
| ID-Heart                     | Infections      | 54 (36, 70)   | 41 (30.75, 52.25)   | 43 (29, 63)      | 56 (38, 71)     |
| ID-Liver                     | Infections      | 43 (33, 55)   | 38 (31, 48)         | 40 (29, 53)      | 44 (34, 57)     |
| ID-Male GU                   | Infections      | 37 (18, 58)   | 38 (18.5, 55)       | 33.5 (19, 50)    | 38 (19, 60)     |
| ID-Other GU                  | Infections      | 30 (23, 40)   | 29 (23, 36)         | 29 (25, 35)      | 30 (23, 41)     |
| ID-Other nervous sys         | Infections      | 57 (36, 73)   | 35 (22, 47.25)      | 38 (25, 65)      | 60 (40, 74)     |
| ID-Other organisms           | Infections      | 38 (5, 70)    | 18 (3, 43)          | 13 (2, 45)       | 42 (6, 71)      |
| ID-Other organs              | Infections      | 28 (3, 58)    | 27 (4, 41)          | 18 (2, 39)       | 30 (3, 60)      |
| ID-Skin                      | Infections      | 48 (26, 71)   | 31 (13, 45)         | 29 (10, 46)      | 51 (29, 73)     |
| LRTI                         | Infections      | 63 (28, 80)   | 30 (3, 51)          | 31 (2, 62)       | 65 (33, 80)     |
| Meningitis                   | Infections      | 26 (9, 38)    | 27 (7, 39)          | 29 (16, 40)      | 26 (9, 39)      |
| PID                          | Infections      | 37 (29, 46)   | 36 (31, 43)         | 36 (30, 43)      | 37 (29, 47)     |
| Rheumatic Fever              | Infections      | 44 (12, 73)   | 44 (27, 64)         | 39 (18.5, 64.5)  | 51 (13, 75)     |
| Sepsis                       | Infections      | 64 (23, 79)   | 26 (0, 54)          | 29 (0, 63)       | 66 (33, 80)     |
| Tuberculosis                 | Infections      | 24 (15, 36)   | 29 (21, 37.75)      | 30 (23, 41)      | 22 (14, 35)     |
| URTI                         | Infections      | 6 (2, 23)     | 5 (2, 23)           | 4 (2, 18)        | 6 (2, 23)       |
| UTI                          | Infections      | 71 (44, 83)   | 45 (28, 71)         | 45 (26, 70)      | 73 (47, 84)     |
| Ankylosing Spondylosis       | Musculoskeletal | 37 (28, 52)   | 38 (31, 50)         | 35 (28.5, 47)    | 38 (29, 54)     |
| Carpal Tunnel Syndrome       | Musculoskeletal | 50 (39, 62)   | 45.5 (37, 55)       | 42 (34, 53)      | 51 (40, 63)     |
| Collapsed Vertebra           | Musculoskeletal | 74 (62, 83)   | 64 (39, 73)         | 67 (48, 76.5)    | 75 (63, 83)     |
| Enteropathic Arthropathy     | Musculoskeletal | 47.5 (34, 62) | 34 (27.75, 46.75)   | 37 (29.5, 47.5)  | 49 (34, 62)     |
| Enthesopathy                 | Musculoskeletal | 48 (38, 59)   | 44 (35, 53)         | 44 (35, 54)      | 50 (39, 61)     |
| Fibromatosis                 | Musculoskeletal | 62 (53, 69)   | 56.5 (47, 64.25)    | 61 (53, 68)      | 62 (54, 70)     |
| Fracture – Hip               | Musculoskeletal | 80 (68, 87)   | 49 (30, 77.5)       | 72 (47, 81)      | 80 (69, 87)     |
| Fracture – Wrist             | Musculoskeletal | 29 (12, 60)   | 15.5 (10, 35)       | 18 (11, 48)      | 34 (13, 62)     |
| Giant Cell Arteritis         | Musculoskeletal | 71 (63, 78)   | 63 (52.5, 72)       | 63 (55, 70)      | 72 (64, 78)     |
| Gout                         | Musculoskeletal | 59 (47, 71)   | 55 (44, 67)         | 52 (41, 64)      | 61 (49, 72)     |
| Intervertebral Disc Disorder | Musculoskeletal | 46 (37, 59)   | 47 (39, 58)         | 45 (36, 57)      | 47 (37, 60)     |
| Juvenile Arthritis           | Musculoskeletal | 11 (5, 15)    | 12.5 (9, 23)        | 11 (5, 14.5)     | 11 (5, 15)      |
| Lupus Erythematosus          | Musculoskeletal | 43 (32, 56)   | 36 (26, 46)         | 38 (28, 49)      | 44 (33, 57)     |
| Osteoarthritis               | Musculoskeletal | 61 (53, 71)   | 55 (47, 66)         | 58 (50, 66)      | 62 (53, 71)     |
| Osteoporosis                 | Musculoskeletal | 71 (61, 80)   | 61 (47, 74)         | 63 (54, 72)      | 72 (62, 80)     |
| Polymyalgia Rheumatica       | Musculoskeletal | 72 (64, 78)   | 68 (55, 76)         | 62 (52, 71)      | 73 (65, 79)     |
| Psoriatic Arthritis          | Musculoskeletal | 46 (36, 57)   | 45 (37, 51)         | 41 (31, 51)      | 47 (36, 57)     |
| Reactive Arthritis           | Musculoskeletal | 34 (22, 47)   | 31 (9, 44.5)        | 33 (6, 45)       | 34 (22, 48)     |
| Rheumatoid Arthritis         | Musculoskeletal | 58 (45, 70)   | 49 (36, 62)         | 49 (36, 61)      | 59 (46, 71)     |
| Scelroderma                  | Musculoskeletal | 53 (39, 65)   | 48.5 (30.25, 66.75) | 48.5 (36.75, 56) | 55 (41, 66)     |

|                             |                 |             |                     |                 |             |
|-----------------------------|-----------------|-------------|---------------------|-----------------|-------------|
|                             |                 |             | 60.25)              |                 |             |
| Scoliosis                   | Musculoskeletal | 35 (16, 66) | 22 (15, 42)         | 29 (15, 53)     | 39 (16, 70) |
| Sjogren Syndrome            | Musculoskeletal | 58 (48, 67) | 42 (35, 59)         | 52 (38.5, 59)   | 59 (49, 68) |
| Spinal Stenosis             | Musculoskeletal | 67 (57, 76) | 64 (51, 73)         | 62 (50, 72)     | 68 (57, 76) |
| Spondylolisthesis           | Musculoskeletal | 59 (43, 72) | 60.5 (52, 70)       | 58 (44.25, 67)  | 60 (44, 72) |
| Spondylosis                 | Musculoskeletal | 57 (47, 68) | 54 (46, 65)         | 52.5 (44, 63)   | 58 (48, 68) |
| Autonomic Neuropathy        | Neurological    | 54 (40, 67) | 57 (39, 68.25)      | 52 (37.5, 66)   | 54 (40, 68) |
| Bells Syndrome              | Neurological    | 42 (27, 58) | 35 (22, 49)         | 36 (24, 51)     | 44 (28, 60) |
| Cerebral Palsy              | Neurological    | 3 (1, 16)   | 3 (1, 12.5)         | 4 (1, 10.5)     | 4 (1, 17)   |
| Chronic Fatigue Syndrome    | Neurological    | 42 (31, 53) | 42 (34, 51)         | 42 (34, 51)     | 43 (31, 54) |
| Diabetic Neuropathy         | Neurological    | 66 (56, 76) | 61 (51.75, 72)      | 61 (52, 70)     | 67 (56, 76) |
| Epilepsy                    | Neurological    | 25 (12, 48) | 23 (8, 42)          | 22 (9, 40)      | 27 (13, 51) |
| Essential Tremor            | Neurological    | 65 (46, 74) | 57.5 (42.25, 71.75) | 56 (32, 69)     | 66 (50, 76) |
| Idiopathic Intracranial HTN | Neurological    | 27 (20, 38) | 29 (20.5, 37)       | 32 (22.5, 41.5) | 27 (20, 38) |
| Migraine                    | Neurological    | 32 (20, 44) | 31 (23, 40)         | 31 (23, 40)     | 32 (21, 45) |
| Motor Neurone Disease       | Neurological    | 67 (53, 76) | 60 (48.75, 75.75)   | 57 (25.5, 71.5) | 67 (54, 76) |
| Multiple Sclerosis          | Neurological    | 40 (31, 50) | 38.5 (31.75, 47.25) | 33 (27, 41)     | 40 (32, 50) |
| Myasthenia Gravis           | Neurological    | 58 (36, 71) | 37 (32, 45.5)       | 57 (40, 69)     | 60 (40, 73) |
| Parkinsons Disease          | Neurological    | 74 (66, 81) | 72 (65, 78)         | 70 (62, 76)     | 74 (66, 81) |
| Peripheral Neuropathy       | Neurological    | 55 (43, 67) | 51 (40, 64)         | 53 (40, 65)     | 56 (43, 68) |
| Trigeminal Neuralgia        | Neurological    | 55 (43, 67) | 49 (39.75, 58)      | 50 (38, 61)     | 56 (43, 68) |
| Congenital Septal Defect    | Perinatal       | 2 (0, 22)   | 1 (0, 6.75)         | 1 (0, 6)        | 2 (0, 28)   |
| Downs Syndrome              | Perinatal       | 0 (0, 13)   | 0 (0, 5)            | 0 (0, 18.25)    | 0 (0, 15)   |
| High Birth Weight           | Perinatal       | 0 (0, 0)    | 0 (0, 0)            | 0 (0, 0)        | 0 (0, 0)    |
| Intrauterine Hypoxia        | Perinatal       | 0 (0, 0)    | 0 (0, 0)            | 0 (0, 0)        | 0 (0, 0)    |
| Low Birth Weight            | Perinatal       | 0 (0, 0)    | 0 (0, 0)            | 0 (0, 0)        | 0 (0, 0)    |
| Neonatal Jaundice           | Perinatal       | 0 (0, 0)    | 0 (0, 0)            | 0 (0, 0)        | 0 (0, 0)    |
| Patent Ductus Arteriosus    | Perinatal       | 0 (0, 1)    | 0 (0, 1)            | 0 (0, 1)        | 0 (0, 1)    |
| Post-term Delivery          | Perinatal       | 0 (0, 0)    | 0 (0, 0)            | 0 (0, 0)        | 0 (0, 0)    |
| Premature Delivery          | Perinatal       | 0 (0, 0)    | 0 (0, 0)            | 0 (0, 0)        | 0 (0, 0)    |
| Resp Distress Newborn       | Perinatal       | 0 (0, 0)    | 0 (0, 0)            | 0 (0, 0)        | 0 (0, 0)    |
| Sepsis of the Newborn       | Perinatal       | 0 (0, 0)    | 0 (0, 0)            | 0 (0, 0)        | 0 (0, 0)    |
| Spina Bifida                | Perinatal       | 18 (2, 33)  | 15.5 (0, 34)        | 3.5 (0, 24.25)  | 19 (3, 35)  |
| Alcohol Misuse              | Psychiatric     | 41 (30, 53) | 39 (30, 48)         | 36 (28, 47)     | 42 (31, 54) |
| Anxiety                     | Psychiatric     | 38 (27, 51) | 36 (27, 45)         | 35 (26, 46)     | 38 (27, 52) |
| Autism                      | Psychiatric     | 9 (5, 15)   | 5 (4, 9)            | 6 (4, 10)       | 9 (5, 15)   |
| Bipolar Affective Disorder  | Psychiatric     | 39 (29, 51) | 33 (25, 41)         | 34 (25, 45)     | 40 (29, 52) |
| Delirium                    | Psychiatric     | 83 (74, 88) | 73 (54, 80)         | 75 (59, 82.75)  | 83 (75, 89) |
| Dementia                    | Psychiatric     | 83 (77, 88) | 77 (72, 82)         | 78 (71, 83)     | 83 (77, 88) |
| Depression                  | Psychiatric     | 37 (27, 50) | 35 (27, 45)         | 36 (28, 47)     | 38 (27, 51) |
| Eating Disorders            | Psychiatric     | 21 (17, 28) | 24 (17, 33.5)       | 21 (18, 27)     | 21 (17, 28) |
| Hyperkinetic Disorders      | Psychiatric     | 10 (7, 14)  | 9 (7, 13)           | 9 (7, 15)       | 10 (7, 14)  |
| Intellectual Disability     | Psychiatric     | 19 (8, 38)  | 15 (7, 27)          | 13 (6, 23)      | 19 (8, 41)  |
| OCD                         | Psychiatric     | 29 (21, 40) | 30 (21.75, 40.25)   | 28 (21, 36)     | 30 (22, 41) |
| Personality Disorder        | Psychiatric     | 30 (22, 41) | 32 (24, 38)         | 32 (23, 40)     | 31 (23, 41) |
| Schizophrenia               | Psychiatric     | 34 (25, 48) | 31 (24, 40.25)      | 31 (24, 43)     | 35 (25, 50) |
| Substance Misuse            | Psychiatric     | 28 (21, 39) | 31 (23, 41)         | 29 (23, 39)     | 28 (22, 40) |
| Allergic/chronic Rhinitis   | Respiratory     | 27 (13, 44) | 27 (11, 39)         | 27 (12, 38)     | 29 (14, 48) |
| Asbestosis                  | Respiratory     | 70 (63, 78) | 73 (68, 76)         | 66 (54, 72)     | 71 (64, 78) |
| Aspiration Pneumonitis      | Respiratory     | 78 (62, 87) | 66 (42, 79)         | 67 (35.25, 80)  | 79 (63, 87) |
| Asthma                      | Respiratory     | 19 (6, 42)  | 15 (5, 35)          | 18 (5, 37)      | 22 (7, 45)  |
| Bronchiectasis              | Respiratory     | 64 (48, 75) | 50.5 (35, 67)       | 60 (40, 73)     | 65 (50, 76) |
| Chronic Sinusitis           | Respiratory     | 42 (31, 55) | 38 (30, 48)         | 36 (28, 46)     | 43 (32, 56) |
| COPD                        | Respiratory     | 66 (57, 76) | 62 (48, 73)         | 66 (55, 75)     | 67 (58, 76) |
| Hypertroph Nasal            | Respiratory     | 34 (21, 47) | 28 (11, 38)         | 28 (19, 37)     | 35 (22, 48) |

|                       |             |               |                |                   |             |
|-----------------------|-------------|---------------|----------------|-------------------|-------------|
| Turbs                 |             |               |                |                   |             |
| Nasal Polyps          | Respiratory | 46 (33, 58)   | 35 (24, 45)    | 35 (25, 46)       | 47 (34, 60) |
| Pleural Effusion      | Respiratory | 72 (57, 83)   | 47 (33, 67)    | 58 (35, 74)       | 73 (59, 83) |
| Pleural Plaque        | Respiratory | 73 (65, 81)   | 68 (60, 76.25) | 67.5 (50.5, 74.5) | 73 (66, 81) |
| Pneumothorax          | Respiratory | 31 (21, 56)   | 31 (21, 45)    | 29 (19, 54.75)    | 34 (22, 59) |
| Pulmonary Collapse    | Respiratory | 67 (50, 79)   | 49 (24, 66)    | 46 (25, 69.25)    | 68 (52, 79) |
| Pulmonary Fibrosis    | Respiratory | 74 (64, 82)   | 51 (39, 69.5)  | 69 (55, 78)       | 75 (65, 82) |
| Respiratory Failure   | Respiratory | 73 (61, 82)   | 53 (35.25, 74) | 67 (45.25, 78)    | 73 (62, 83) |
| Sleep apnoea          | Respiratory | 48 (33, 59)   | 29 (4, 45)     | 38 (7, 51)        | 49 (36, 60) |
| Acne                  | Skin        | 18 (15, 26)   | 23 (16, 33)    | 21 (16, 29)       | 18 (15, 27) |
| Actinic keratosis     | Skin        | 68 (59, 76)   | 58 (48, 69)    | 59 (49, 69)       | 69 (60, 77) |
| Alopecia Areata       | Skin        | 30 (18, 42)   | 26 (14, 37)    | 29 (20, 36)       | 31 (19, 44) |
| Dermatitis            | Skin        | 24 (3, 47)    | 9 (2, 33)      | 18 (2, 37)        | 28 (4, 51)  |
| Hidradenitis          | Skin        | 34 (26, 44)   | 33 (23, 41)    | 32 (25, 41)       | 35 (26, 44) |
| Lichen Planus         | Skin        | 53 (39.5, 64) | 40 (30, 51)    | 45 (34, 57)       | 55 (42, 65) |
| Pilonidal cyst/sinus  | Skin        | 25 (20, 34)   | 29 (20, 38)    | 25 (20, 31)       | 26 (21, 35) |
| Psoriasis             | Skin        | 37 (23, 54)   | 34 (22.75, 45) | 35 (24, 49)       | 39 (24, 56) |
| Rosacea               | Skin        | 45 (33, 58)   | 33 (21, 43)    | 34 (24, 44)       | 47 (35, 60) |
| Seborrheic Dermatitis | Skin        | 33 (13, 53)   | 11 (2, 33)     | 19 (2, 34)        | 37 (15, 58) |
| Urticaria             | Skin        | 28 (8, 47)    | 27 (9, 41)     | 28 (9, 42)        | 30 (9, 50)  |
| Vitiligo              | Skin        | 33 (17, 48)   | 30 (12, 46)    | 26 (10, 42)       | 36 (21, 52) |

**Supplementary Table S8.** Comparison of study design and characteristics between this study and the GBD<sup>1</sup> and Barnett<sup>2</sup> studies.

| <b>Study characteristics</b>                             | <b>Kuan</b>                                                                                                                                                                                                                                                                                                             | <b>GBD<sup>1</sup></b>                                                                                                                                                                             | <b>Barnett<sup>2</sup></b>                                                                                                                                                                                                                                                                                                                   |
|----------------------------------------------------------|-------------------------------------------------------------------------------------------------------------------------------------------------------------------------------------------------------------------------------------------------------------------------------------------------------------------------|----------------------------------------------------------------------------------------------------------------------------------------------------------------------------------------------------|----------------------------------------------------------------------------------------------------------------------------------------------------------------------------------------------------------------------------------------------------------------------------------------------------------------------------------------------|
| <b>Number of diseases</b>                                | 308                                                                                                                                                                                                                                                                                                                     | 354                                                                                                                                                                                                | 40                                                                                                                                                                                                                                                                                                                                           |
| <b>Disease selection</b>                                 | <ul style="list-style-type: none"> <li>diseases from the quality and outcomes framework (QOF)</li> <li>Hospital Episode Statistics Finished Consultant Episodes from all diagnoses for England &gt; 10,000 from 1 April 2014 to 31 March 2015</li> <li>Period prevalence &gt; 0.01% and clinically important</li> </ul> | “reflect the policy relevance, public health, and medical care importance of the causes of major losses of health”                                                                                 | <ul style="list-style-type: none"> <li>morbidities recommended as core for any multimorbidity measure by Diederichs and colleagues' 2010 systematic review</li> <li>diseases in the quality and outcomes framework (QOF) of the UK general practice contract</li> <li>long-term disorders identified as important by NHS Scotland</li> </ul> |
| <b>Source data</b>                                       | Electronic Health Records from <ul style="list-style-type: none"> <li>primary care</li> <li>secondary care with linkage of individual records using unique NHS identification numbers</li> </ul>                                                                                                                        | Various, including: <ul style="list-style-type: none"> <li>published literature</li> <li>surveillance data</li> <li>survey data</li> <li>hospital and clinical data</li> <li>other data</li> </ul> | Electronic Health Records from primary care only                                                                                                                                                                                                                                                                                             |
| <b>Geographical reach</b>                                | England                                                                                                                                                                                                                                                                                                                 | Results tabulated for 195 countries, comparison made with United Kingdom estimates                                                                                                                 | Scotland                                                                                                                                                                                                                                                                                                                                     |
| <b>Disease frequency measure</b>                         | Period prevalence                                                                                                                                                                                                                                                                                                       | Point prevalence                                                                                                                                                                                   | Point prevalence                                                                                                                                                                                                                                                                                                                             |
| <b>Calculation method for disease frequency</b>          | Empirical frequency calculation: Cases divided by relevant population                                                                                                                                                                                                                                                   | DisMod-MR 2.1, the GBD Bayesian meta-regression tool                                                                                                                                               | Empirical frequency calculation: Cases divided by relevant population                                                                                                                                                                                                                                                                        |
| <b>Single disease prevalence stratified by sex</b>       | Yes                                                                                                                                                                                                                                                                                                                     | Yes                                                                                                                                                                                                | No                                                                                                                                                                                                                                                                                                                                           |
| <b>Single disease prevalence stratified by age</b>       | Yes                                                                                                                                                                                                                                                                                                                     | Yes                                                                                                                                                                                                | No                                                                                                                                                                                                                                                                                                                                           |
| <b>Single disease prevalence stratified by ethnicity</b> | Yes                                                                                                                                                                                                                                                                                                                     | No                                                                                                                                                                                                 | No                                                                                                                                                                                                                                                                                                                                           |
| <b>Age at single disease diagnosis</b>                   | Estimated by age at first record                                                                                                                                                                                                                                                                                        | No                                                                                                                                                                                                 | No                                                                                                                                                                                                                                                                                                                                           |

**Supplementary Table S9.** Comparison of disease prevalences between this study, the Global Burden of Disease (GBD 2017)<sup>1</sup> study and the Barnett (2012)<sup>2</sup> study. Our study reports age and sex-standardised period prevalences in England from 1 April 2010 to 31 March 2015, whereas the GBD and Barnett studies computed point prevalences as at 2017 for the United Kingdom and 31 March 2007 for Scotland, respectively. Disease categories are arranged according to ICD-10 categories. Within disease categories, diseases are ranked in descending order of period prevalence from our study. Case definitions for some conditions may not be directly comparable – please refer to individual studies for details.

| Disease Category                | Disease label (Kuan 2018)               | Prevalence per 10,000 (Kuan 2018) | Disease label (GBD 2017) <sup>1</sup>   | Prevalence per 10,000 (GBD 2017) <sup>1</sup> | Disease label (Barnett 2012) <sup>2</sup> | Prevalence per 10,000 (Barnett 2012) <sup>2</sup> |
|---------------------------------|-----------------------------------------|-----------------------------------|-----------------------------------------|-----------------------------------------------|-------------------------------------------|---------------------------------------------------|
| <b>Infections</b>               | Infection – Lower Respiratory Tract     | 623.8                             | Lower respiratory infections            | 4.4                                           |                                           |                                                   |
| <b>Infections</b>               | Urinary Tract Infection                 | 439.2                             | Urinary tract infections                | 7.1                                           |                                           |                                                   |
| <b>Infections</b>               | Infection – Ear/Upper Respiratory Tract | 381.5                             | Upper respiratory infections            | 423.9                                         |                                           |                                                   |
| <b>Infections</b>               | Tuberculosis                            | 67.8                              | Tuberculosis                            | 902.1                                         |                                           |                                                   |
| <b>Infections</b>               | Chronic Viral Hepatitis                 | 24.3                              |                                         |                                               | Viral Hepatitis                           | 10                                                |
| <b>Infections</b>               | Meningitis                              | 11.2                              | Meningitis                              | 4.9                                           |                                           |                                                   |
| <b>Infections</b>               | HIV                                     | 8.9                               | HIV/AIDS                                | 14.2                                          |                                           |                                                   |
| <b>Infections</b>               | Encephalitis                            | 2.6                               | Encephalitis                            | 2.4                                           |                                           |                                                   |
| <b>Benign/In situ Neoplasms</b> | Leiomyoma                               | 401.2                             | Uterine fibroids                        | 197.7                                         |                                           |                                                   |
| <b>Benign/In situ Neoplasms</b> | Benign Neoplasm – Colon                 | 289.1                             | Benign and in situ intestinal neoplasms | 2.5                                           |                                           |                                                   |
| <b>Cancers</b>                  | Primary Malignancy – Skin               | 311.6                             | Non-melanoma skin cancer                | 5.6                                           |                                           |                                                   |
| <b>Cancers</b>                  | Primary Malignancy – Prostate           | 209.4                             | Prostate cancer                         | 56.6                                          |                                           |                                                   |
| <b>Cancers</b>                  | Primary Malignancy – Breast             | 138.5                             | Breast cancer                           | 78.2                                          |                                           |                                                   |
| <b>Cancers</b>                  | Primary Malignancy – Bowel              | 80.0                              | Colon and rectum cancer                 | 43.2                                          |                                           |                                                   |
| <b>Cancers</b>                  | Primary Malignancy – Melanoma           | 52.2                              | Malignant skin melanoma                 | 27.7                                          |                                           |                                                   |
| <b>Cancers</b>                  | Primary Malignancy – Bladder            | 46.5                              | Bladder cancer                          | 9.5                                           |                                           |                                                   |
| <b>Cancers</b>                  | Primary Malignancy – Lung               | 45.2                              | Tracheal, bronchus, and lung cancer     | 14.4                                          |                                           |                                                   |
| <b>Cancers</b>                  | Primary Malignancy – Uterus             | 36.9                              | Uterine cancer                          | 12.5                                          |                                           |                                                   |
| <b>Cancers</b>                  | Non Hodgkins Lymphoma                   | 29.6                              | Non-Hodgkin lymphoma                    | 14.6                                          |                                           |                                                   |
| <b>Cancers</b>                  | Primary Malignancy – Ovary              | 28.9                              | Ovarian cancer                          | 4.9                                           |                                           |                                                   |
| <b>Cancers</b>                  | Leukaemia                               | 22.7                              | Leukemia                                | 9.6                                           |                                           |                                                   |
| <b>Cancers</b>                  | Primary Malignancy – Cervix             | 19.2                              | Cervical cancer                         | 4.4                                           |                                           |                                                   |
| <b>Cancers</b>                  | Primary Malignancy – Kidney             | 17.5                              | Kidney cancer                           | 7.8                                           |                                           |                                                   |
| <b>Cancers</b>                  | Primary Malignancy – Testis             | 16.2                              | Testicular cancer                       | 3.4                                           |                                           |                                                   |
| <b>Cancers</b>                  | Primary Malignancy – Oesophageal        | 13.0                              | Esophageal cancer                       | 1.9                                           |                                           |                                                   |
| <b>Cancers</b>                  | Primary Malignancy – Stomach            | 11.1                              | Stomach cancer                          | 4.9                                           |                                           |                                                   |
| <b>Cancers</b>                  | Plasma Cell Malignancy                  | 10.4                              | Multiple myeloma                        | 3.9                                           |                                           |                                                   |
| <b>Cancers</b>                  | Primary Malignancy – Pancreas           | 9.9                               | Pancreatic cancer                       | 1.2                                           |                                           |                                                   |
| <b>Cancers</b>                  | Primary Malignancy – Brain              | 9.5                               | Brain and nervous system cancer         | 7.4                                           |                                           |                                                   |
| <b>Cancers</b>                  | Hodgkins Lymphoma                       | 7.2                               | Hodgkin lymphoma                        | 3.7                                           |                                           |                                                   |
| <b>Cancers</b>                  | Primary Malignancy – Thyroid            | 6.5                               | Thyroid cancer                          | 4.1                                           |                                           |                                                   |
| <b>Cancers</b>                  | Primary Malignancy – Liver              | 4.3                               | Liver cancer                            | 0.4                                           |                                           |                                                   |
| <b>Cancers</b>                  | Primary Malignancy – Biliary            | 4.0                               | Gallbladder and biliary tract cancer    | 0.5                                           |                                           |                                                   |
| <b>Cancers</b>                  | Primary Malignancy – Mesothelioma       | 3.1                               | Mesothelioma                            | 1.2                                           |                                           |                                                   |
| <b>Haem/Imm</b>                 | Sickle Cell Trait                       | 14.4                              | Sickle cell trait                       | 408.8                                         |                                           |                                                   |
| <b>Haem/Imm</b>                 | Thalassaemia Trait                      | 14.0                              | Thalassaemias trait                     | 57.4                                          |                                           |                                                   |
| <b>Haem/Imm</b>                 | Thalassaemia                            | 5.5                               | Thalassaemias                           | 0.0                                           |                                           |                                                   |
| <b>Haem/Imm</b>                 | Sickle Cell Disease                     | 2.7                               | Sickle cell disorders                   | 0.1                                           |                                           |                                                   |
| <b>Endocrine</b>                | Type 2 Diabetes Mellitus                | 599.6                             | Diabetes mellitus type 2                | 866.3                                         |                                           |                                                   |



|                       |                                       |         |                                                     |         |                                                                       |      |
|-----------------------|---------------------------------------|---------|-----------------------------------------------------|---------|-----------------------------------------------------------------------|------|
| <b>Endocrine</b>      | Thyroid Disease                       | 518.1   |                                                     |         | Thyroid disorders                                                     | 410  |
| <b>Endocrine</b>      | Polycystic Ovarian Syndrome           | 90.1    | Polycystic ovarian syndrome                         | 64.5    |                                                                       |      |
| <b>Endocrine</b>      | Type 1 Diabetes Mellitus              | 42.5    | Diabetes mellitus type 1                            | 42.8    |                                                                       |      |
| <b>Psychiatric</b>    | Depression                            | 1,744.3 | Depressive disorders                                | 435.7   | Depression                                                            | 820  |
| <b>Psychiatric</b>    | Anxiety                               | 1,296.2 | Anxiety disorders                                   | 443.7   | Anxiety & other neurotic, stress related & somatoform disorders       | 320  |
| <b>Psychiatric</b>    | Alcohol Misuse                        | 293.5   | Alcohol use disorders                               | 176.2   | Alcohol problems                                                      | 240  |
| <b>Psychiatric</b>    | Dementia                              | 208.7   | Alzheimer's disease and other dementias             | 122.7   | Dementia                                                              | 70   |
| <b>Psychiatric</b>    | Substance Misuse                      | 159.3   | Drug use disorders                                  | 143.3   | Other psychoactive substance misuse                                   | 240  |
| <b>Psychiatric</b>    | Schizophrenia                         | 75.4    | Schizophrenia                                       | 28.8    | Schizophrenia (and related non-organic psychosis) or bipolar disorder | 70   |
| <b>Psychiatric</b>    | Intellectual Disability               | 64.5    | Idiopathic developmental intellectual disability    | 32.8    | Learning disability                                                   | 30   |
| <b>Psychiatric</b>    | Bipolar Affective Disorder            | 45.1    | Bipolar disorder                                    | 105.1   |                                                                       |      |
| <b>Psychiatric</b>    | Autism                                | 39.0    | Autism spectrum disorders                           | 59.2    |                                                                       |      |
| <b>Psychiatric</b>    | Hyperkinetic Disorders                | 34.3    | Attention-deficit/hyperactivity disorder            | 74.1    |                                                                       |      |
| <b>Psychiatric</b>    | Eating Disorders                      | 33.3    | Eating disorders                                    | 43.8    | Anorexia or bulimia                                                   | 30   |
| <b>Neurological</b>   | Migraine                              | 696.7   | Migraine                                            | 2,064.6 | Migraine                                                              | 60   |
| <b>Neurological</b>   | Epilepsy                              | 179.3   | Epilepsy                                            | 38.7    | Epilepsy (currently treated)                                          | 80   |
| <b>Neurological</b>   | Parkinson's Disease                   | 47.1    | Parkinson's disease                                 | 20.0    | Parkinson's disease                                                   | 20   |
| <b>Neurological</b>   | Multiple Sclerosis                    | 26.2    | Multiple sclerosis                                  | 14.6    | Multiple sclerosis                                                    | 20   |
| <b>Neurological</b>   | Motor Neurone Disease                 | 4.5     | Motor neuron disease                                | 1.2     |                                                                       |      |
| <b>Eye</b>            | Cataract                              | 673.4   | Cataract                                            | 60.2    |                                                                       |      |
| <b>Eye</b>            | Glaucoma                              | 182.4   | Glaucoma                                            | 10.8    | Glaucoma                                                              | 90   |
| <b>Eye</b>            | Macular Degeneration                  | 144.3   | Age-related macular degeneration                    | 23.0    |                                                                       |      |
| <b>Eye</b>            | Blindness                             | 120.3   | Blindness and vision impairment                     | 704.7   | Blindness & low vision                                                | 50   |
| <b>Ear</b>            | Deafness                              | 885.9   | Age-related and other hearing loss                  | 1,911.7 | Hearing loss                                                          | 340  |
| <b>Cardiovascular</b> | Hypertension                          | 2,062.7 |                                                     |         | Hypertension                                                          | 1340 |
| <b>Cardiovascular</b> | Atrial Fibrillation                   | 432.9   | Atrial fibrillation and flutter                     | 140.3   | Atrial fibrillation                                                   | 140  |
| <b>Cardiovascular</b> | Heart Failure                         | 277.5   |                                                     |         | Heart failure                                                         | 110  |
| <b>Cardiovascular</b> | Peripheral Arterial Disease           | 162.1   | Peripheral artery disease                           | 275.9   | Peripheral vascular disease                                           | 130  |
| <b>Cardiovascular</b> | Ischaemic Stroke                      | 134.2   | Ischemic stroke                                     | 125.7   |                                                                       |      |
| <b>Cardiovascular</b> | Non-rheumatic Aortic valve disorder   | 98.6    | Non-rheumatic calcific aortic valve disease         | 80.1    |                                                                       |      |
| <b>Cardiovascular</b> | Non-rheumatic Mitral valve disorder   | 84.0    | Non-rheumatic degenerative mitral valve disease     | 45.9    |                                                                       |      |
| <b>Cardiovascular</b> | Intracerebral Haemorrhage             | 31.5    | Intracerebral hemorrhage                            | 13.7    |                                                                       |      |
| <b>Cardiovascular</b> | Rheumatic Valve Disorder              | 21.7    | Rheumatic heart disease                             | 0.6     |                                                                       |      |
| <b>Cardiovascular</b> | Subarachnoid Haemorrhage              | 20.7    | Subarachnoid hemorrhage                             | 19.6    |                                                                       |      |
| <b>Cardiovascular</b> | Dilated cardiomyopathy                | 14.7    | Alcoholic cardiomyopathy                            | 3.4     |                                                                       |      |
| <b>Respiratory</b>    | Asthma                                | 1,498.9 | Asthma                                              | 837.1   | Asthma                                                                | 600  |
| <b>Respiratory</b>    | Chronic Obstructive Pulmonary Disease | 371.5   | Chronic obstructive pulmonary disease               | 818.9   | Chronic obstructive pulmonary disease                                 | 320  |
| <b>Respiratory</b>    | Chronic Sinusitis                     | 219.5   |                                                     |         | Chronic sinusitis                                                     | 50   |
| <b>Respiratory</b>    | Bronchiectasis                        | 57.3    |                                                     |         | Bronchiectasis                                                        | 20   |
| <b>Respiratory</b>    | Pulmonary Fibrosis                    | 28.5    | Interstitial lung disease and pulmonary sarcoidosis | 16.5    |                                                                       |      |

|                             |                                   |         |                                               |         |                                       |
|-----------------------------|-----------------------------------|---------|-----------------------------------------------|---------|---------------------------------------|
| <b>Respiratory</b>          | Asbestosis                        | 12.2    | Asbestosis                                    | 0.3     |                                       |
| <b>Digestive</b>            | Gastro-oesophageal Reflux Disease | 941.6   | Gastroesophageal reflux disease               | 1,281.4 |                                       |
| <b>Digestive</b>            | Abdominal Hernia                  | 757.2   | Inguinal, femoral, and abdominal hernia       | 38.0    |                                       |
| <b>Digestive</b>            | Gastritis                         | 648.6   | Gastritis and duodenitis                      | 134.1   |                                       |
| <b>Digestive</b>            | Irritable Bowel Syndrome          | 607.0   |                                               |         | Irritable bowel syndrome 300          |
| <b>Digestive</b>            | Appendicitis                      | 563.1   | Appendicitis                                  | 0.3     |                                       |
| <b>Digestive</b>            | Diverticular Disease              | 461.8   |                                               |         | Diverticular disease of intestine 190 |
| <b>Digestive</b>            | Peptic Ulcer                      | 246.9   | Peptic ulcer disease                          | 13.1    |                                       |
| <b>Digestive</b>            | Pancreatitis                      | 60.1    | Pancreatitis                                  | 20.6    |                                       |
| <b>Digestive</b>            | Angiodysplasia of colon           | 8.5     | Vascular intestinal disorders                 | 0.3     |                                       |
| <b>Skin</b>                 | Dermatitis                        | 2,543.5 | Dermatitis                                    | 682.3   |                                       |
| <b>Skin</b>                 | Acne                              | 734.4   | Acne vulgaris                                 | 319.7   |                                       |
| <b>Skin</b>                 | Urticaria                         | 520.2   | Urticaria                                     | 72.3    |                                       |
| <b>Skin</b>                 | Seborrheic Dermatitis             | 498.4   | Seborrhoeic dermatitis                        | 8.9     |                                       |
| <b>Skin</b>                 | Psoriasis                         | 348.1   | Psoriasis                                     | 214.3   |                                       |
| <b>Skin</b>                 | Alopecia Areata                   | 38.0    | Alopecia areata                               | 32.2    |                                       |
| <b>Musculoskeletal</b>      | Osteoarthritis                    | 1,271.6 | Osteoarthritis                                | 730.5   |                                       |
| <b>Musculoskeletal</b>      | Gout                              | 318.3   | Gout                                          | 123.7   |                                       |
| <b>Musculoskeletal</b>      | Rheumatoid Arthritis              | 115.4   | Rheumatoid arthritis                          | 69.7    |                                       |
| <b>Genitourinary</b>        | Benign Prostatic Hyperplasia      | 769.4   | Benign prostatic hyperplasia                  | 171.8   | Prostate disorders 90                 |
| <b>Genitourinary</b>        | Uterovaginal Prolapse             | 537.2   | Genital prolapse                              | 259.3   |                                       |
| <b>Genitourinary</b>        | Chronic Kidney Disease            | 427.4   | Chronic kidney disease                        | 845.9   | Chronic kidney disease 190            |
| <b>Genitourinary</b>        | Female Infertility                | 251.5   | Female infertility                            | 27.2    |                                       |
| <b>Genitourinary</b>        | Urolithiasis                      | 239.9   | Urolithiasis                                  | 5.9     |                                       |
| <b>Genitourinary</b>        | Endometriosis                     | 228.3   | Endometriosis                                 | 86.0    |                                       |
| <b>Genitourinary</b>        | Glomerulonephritis                | 68.9    | Acute glomerulonephritis                      | 0.0     |                                       |
| <b>Genitourinary</b>        | Male infertility                  | 62.3    | Male infertility                              | 27.2    |                                       |
| <b>Perinatal/Congenital</b> | Neonatal Jaundice                 | 91.8    | Hemolytic disease and other neonatal jaundice | 0.8     |                                       |
| <b>Perinatal/Congenital</b> | Premature Delivery                | 69.3    | Neonatal preterm birth                        | 102.7   |                                       |
| <b>Perinatal/Congenital</b> | Congenital Septal Defect          | 36.5    | Congenital heart anomalies                    | 12.3    |                                       |
| <b>Perinatal/Congenital</b> | Sepsis of the Newborn             | 15.8    | Neonatal sepsis and other neonatal infections | 30.8    |                                       |
| <b>Perinatal/Congenital</b> | Spina Bifida                      | 11.6    | Neural tube defects                           | 2.5     |                                       |
| <b>Perinatal/Congenital</b> | Down Syndrome                     | 7.1     | Down syndrome                                 | 6.2     |                                       |

**Supplementary Table S10A.** Infectious diseases and their prevalences (ranked in descending order) from the Kuan 2018, GBD 2017<sup>1</sup>, and Barnett 2012<sup>2</sup> studies which are not reported in any of the other studies.

| Disease label (Kuan 2018)        | Prevalence per 10,000 (Kuan 2018) | Disease label (GBD 2017)                      | Prevalence per 10,000 (GBD 2017) | Disease label (Barnett 2012) | Prevalence per 10,000 (Barnett 2012) |
|----------------------------------|-----------------------------------|-----------------------------------------------|----------------------------------|------------------------------|--------------------------------------|
| Bacterial Infection              | 1,008                             | Respiratory infections and tuberculosis       | 1375                             |                              |                                      |
| Infection – Other organisms      | 946                               | HIV/AIDS and sexually transmitted infections  | 1320                             |                              |                                      |
| Infection – Other organs         | 330                               | Sexually transmitted infections excluding HIV | 1309                             |                              |                                      |
| Viral Infection                  | 327                               | Fungal skin diseases                          | 1107                             |                              |                                      |
| Infection – Skin                 | 295                               | Genital herpes                                | 1079                             |                              |                                      |
| Infection – Digestive System     | 250                               | Latent tuberculosis infection                 | 902                              |                              |                                      |
| Pelvic Inflammatory Disease      | 183                               | Viral skin diseases                           | 147                              |                              |                                      |
| Septicaemia                      | 127                               | Trichomoniasis                                | 110                              |                              |                                      |
| Fungal Infection                 | 75                                | Chlamydial infection                          | 101                              |                              |                                      |
| Infection – Male Genitourinary   | 64                                | Otitis media                                  | 98                               |                              |                                      |
| Rheumatic Fever                  | 37                                | Diarrheal diseases                            | 56                               |                              |                                      |
| Infection – Anorectal            | 36                                | Enteric infections                            | 56                               |                              |                                      |
| Infection – Bone                 | 29                                | Other infectious diseases                     | 54                               |                              |                                      |
| Infection – Eye                  | 27                                | Gonococcal infection                          | 35                               |                              |                                      |
| Infection – Other Genitourinary  | 23                                | Other unspecified infectious diseases         | 34                               |                              |                                      |
| Infection – Liver                | 21                                | Bacterial skin diseases                       | 26                               |                              |                                      |
| Parasitic Infection              | 12                                | Syphilis                                      | 22                               |                              |                                      |
| Infection – Other nervous system | 11                                | Pyoderma                                      | 16                               |                              |                                      |
| Infection – Heart                | 6                                 | Acute hepatitis                               | 12                               |                              |                                      |
|                                  |                                   | Other sexually transmitted infections         | 10                               |                              |                                      |
|                                  |                                   | Scabies                                       | 10                               |                              |                                      |
|                                  |                                   | Cellulitis                                    | 10                               |                              |                                      |
|                                  |                                   | Cysticercosis                                 | 9                                |                              |                                      |
|                                  |                                   | Neglected tropical diseases and malaria       | 9                                |                              |                                      |
|                                  |                                   | Varicella and herpes zoster                   | 9                                |                              |                                      |
|                                  |                                   | Acute hepatitis A                             | 7                                |                              |                                      |
|                                  |                                   | Acute hepatitis B                             | 4                                |                              |                                      |
|                                  |                                   | Other meningitis                              | 3                                |                              |                                      |
|                                  |                                   | Whooping cough                                | 1                                |                              |                                      |
|                                  |                                   | Meningococcal meningitis                      | 1                                |                              |                                      |
|                                  |                                   | Pneumococcal meningitis                       | 1                                |                              |                                      |
|                                  |                                   | Acute hepatitis E                             | 1                                |                              |                                      |
|                                  |                                   | Drug-susceptible tuberculosis                 | 1                                |                              |                                      |
|                                  |                                   | Acute hepatitis C                             | 0                                |                              |                                      |
|                                  |                                   | H influenzae type B meningitis                | 0                                |                              |                                      |
|                                  |                                   | Chagas disease                                | 0                                |                              |                                      |

|                                                                               |   |
|-------------------------------------------------------------------------------|---|
| HIV/AIDS - Drug-susceptible Tuberculosis                                      | 0 |
| Multidrug-resistant tuberculosis without extensive drug resistance            | 0 |
| Invasive Non-typhoidal Salmonella (iNTS)                                      | 0 |
| Cystic echinococcosis                                                         | 0 |
| Paratyphoid fever                                                             | 0 |
| Typhoid fever                                                                 | 0 |
| Extensively drug-resistant tuberculosis                                       | 0 |
| HIV/AIDS - Multidrug-resistant Tuberculosis without extensive drug resistance | 0 |
| Measles                                                                       | 0 |
| HIV/AIDS - Extensively drug-resistant Tuberculosis                            | 0 |
| Leprosy                                                                       | 0 |
| Tetanus                                                                       | 0 |
| Diphtheria                                                                    | 0 |
| Rabies                                                                        | 0 |
| Other intestinal infectious diseases                                          | 0 |
| Malaria                                                                       | 0 |
| Leishmaniasis                                                                 | 0 |
| Visceral leishmaniasis                                                        | 0 |
| Cutaneous and mucocutaneous leishmaniasis                                     | 0 |
| African trypanosomiasis                                                       | 0 |
| Schistosomiasis                                                               | 0 |
| Lymphatic filariasis                                                          | 0 |
| Onchocerciasis                                                                | 0 |
| Trachoma                                                                      | 0 |
| Dengue                                                                        | 0 |
| Yellow fever                                                                  | 0 |
| Intestinal nematode infections                                                | 0 |
| Ascariasis                                                                    | 0 |
| Trichuriasis                                                                  | 0 |
| Hookworm disease                                                              | 0 |
| Food-borne trematodiasis                                                      | 0 |
| Other neglected tropical diseases                                             | 0 |
| Ebola                                                                         | 0 |
| Zika virus                                                                    | 0 |
| Guinea worm disease                                                           | 0 |
| Typhoid and paratyphoid                                                       | 0 |

**Supplementary Table S10B.** Neoplastic diseases and their prevalences (ranked in descending order) from the Kuan 2018, GBD 2017<sup>1</sup>, and Barnett 2012<sup>2</sup> studies which are not reported in any of the other studies.

| Disease label (Kuan 2018)                          | Prevalence per 10,000 (Kuan 2018) | Disease label (GBD 2017)                           | Prevalence per 10,000 (GBD 2017) | Disease label (Barnett 2012)               | Prevalence per 10,000 (Barnett 2012) |
|----------------------------------------------------|-----------------------------------|----------------------------------------------------|----------------------------------|--------------------------------------------|--------------------------------------|
| Benign Neoplasm – Ovary                            | 383                               | Neoplasms                                          | 394                              | New diagnosis of cancer in last five years | 250                                  |
| Cervical Intra-epithelial Neoplasia                | 241                               | Other malignant neoplasms                          | 68                               |                                            |                                      |
| Benign Neoplasm – Uterus                           | 181                               | Other neoplasms                                    | 25                               |                                            |                                      |
| Haemangioma                                        | 127                               | Other benign and in situ neoplasms                 | 19                               |                                            |                                      |
| Secondary Malignancy – Lymph Nodes                 | 65                                | Chronic lymphoid leukemia                          | 6                                |                                            |                                      |
| Benign Neoplasm – Stomach                          | 56                                | Non-melanoma skin cancer (squamous-cell carcinoma) | 4                                |                                            |                                      |
| Secondary Malignancy – Liver                       | 40                                | Lip and oral cavity cancer                         | 4                                |                                            |                                      |
| Secondary Malignancy – Bone                        | 36                                | Larynx cancer                                      | 3                                |                                            |                                      |
| Primary Malignancy – other                         | 33                                | Non-melanoma skin cancer (basal-cell carcinoma)    | 2                                |                                            |                                      |
| Secondary Malignancy – Lung                        | 28                                | Other pharynx cancer                               | 2                                |                                            |                                      |
| Benign Neoplasm – Brain                            | 25                                | Acute lymphoid leukemia                            | 1                                |                                            |                                      |
| Secondary Malignancy – other                       | 18                                | Other leukemia                                     | 1                                |                                            |                                      |
| Primary Malignancy – Oropharyngeal                 | 17                                | Acute myeloid leukemia                             | 1                                |                                            |                                      |
| Secondary Malignancy – Peritoneum                  | 15                                | Benign and in situ cervical and uterine neoplasms  | 1                                |                                            |                                      |
| Monoclonal Gammopathy of Undetermined Significance | 12                                | Liver cancer due to alcohol use                    | 1                                |                                            |                                      |
| Myelodysplastic Syndrome                           | 11                                | Liver cancer due to hepatitis C                    | 0                                |                                            |                                      |
| Polycythaemia vera                                 | 11                                | Nasopharynx cancer                                 | 0                                |                                            |                                      |
| Secondary Malignancy – Brain                       | 11                                | Chronic myeloid leukemia                           | 0                                |                                            |                                      |
| Secondary Malignancy – Pleura                      | 7                                 | Liver cancer due to hepatitis B                    | 0                                |                                            |                                      |
| Secondary Malignancy – Adrenal                     | 5                                 | Liver cancer due to NASH                           | 0                                |                                            |                                      |
| Primary Malignancy – Bone                          | 4                                 | Liver cancer due to other causes                   | 0                                |                                            |                                      |
| Secondary Malignancy – Bowel                       | 3                                 |                                                    |                                  |                                            |                                      |
| Primary Malignancy – Multiple Sites                | 2                                 |                                                    |                                  |                                            |                                      |

**Supplementary Table S10C.** Haematological and Immunological diseases and their prevalences (ranked in descending order) from the Kuan 2018, GBD 2017<sup>1</sup>, and Barnett 2012<sup>2</sup> studies which are not reported in any of the other studies.

| Disease label (Kuan 2018)      | Prevalence per 10,000 (Kuan 2018) | Disease label (GBD 2017)                       | Prevalence per 10,000 (GBD 2017) | Disease label (Barnett 2012) | Prevalence per 10,000 (Barnett 2012) |
|--------------------------------|-----------------------------------|------------------------------------------------|----------------------------------|------------------------------|--------------------------------------|
| Anaemia – other                | 511                               | Hemoglobinopathies and hemolytic anemias       | 1564                             |                              |                                      |
| Iron Deficiency Anaemia        | 433                               | G6PD trait                                     | 944                              |                              |                                      |
| Agranulocytosis                | 60                                | G6PD deficiency                                | 177                              |                              |                                      |
| Vitamin B12 deficiency anaemia | 50                                | Other hemoglobinopathies and hemolytic anemias | 50                               |                              |                                      |
| Secondary Thrombocytopenia     | 44                                |                                                |                                  |                              |                                      |
| Sarcoidosis                    | 20                                |                                                |                                  |                              |                                      |
| Folate Deficiency Anaemia      | 16                                |                                                |                                  |                              |                                      |
| Primary thrombocytopenia       | 15                                |                                                |                                  |                              |                                      |
| Hyposplenism                   | 15                                |                                                |                                  |                              |                                      |
| Hypersplenism                  | 15                                |                                                |                                  |                              |                                      |
| Aplastic Anaemia               | 12                                |                                                |                                  |                              |                                      |
| Thrombophilia                  | 12                                |                                                |                                  |                              |                                      |
| Other haemolytic anaemia       | 12                                |                                                |                                  |                              |                                      |
| Secondary Polycythaemia        | 10                                |                                                |                                  |                              |                                      |
| Immunodeficiency               | 6                                 |                                                |                                  |                              |                                      |

**Supplementary Table S10D.** Endocrine, metabolic and nutritional diseases and their prevalences (ranked in descending order) from the Kuan 2018, GBD 2017<sup>1</sup>, and Barnett 2012<sup>2</sup> studies which are not reported in any of the other studies.

| Disease label (Kuan 2018)                      | Prevalence per 10,000 (Kuan 2018) | Disease label (GBD 2017)       | Prevalence per 10,000 (GBD 2017) | Disease label (Barnett 2012) | Prevalence per 10,000 (Barnett 2012) |
|------------------------------------------------|-----------------------------------|--------------------------------|----------------------------------|------------------------------|--------------------------------------|
| Raised Total Cholesterol                       | 2398                              | Nutritional deficiencies       | 1042                             | Diabetes                     | 430                                  |
| Obesity                                        | 1692                              | Diabetes mellitus              | 909                              |                              |                                      |
| Raised LDL-C                                   | 1531                              | Dietary iron deficiency        | 732                              |                              |                                      |
| Raised Triglycerides                           | 1123                              | Vitamin A deficiency           | 196                              |                              |                                      |
| Low HDL-C                                      | 673                               | Iodine deficiency              | 111                              |                              |                                      |
| Diabetes Mellitus – other or not specified     | 35                                | Protein-energy malnutrition    | 60                               |                              |                                      |
| Hyperparathyroidism                            | 22                                | Other nutritional deficiencies | 0                                |                              |                                      |
| Syndrome of Inappropriate AntiDiuretic Hormone | 6                                 |                                |                                  |                              |                                      |
| Cystic Fibrosis                                | 5                                 |                                |                                  |                              |                                      |

**Supplementary Table S10E.** Mental and behavioural disorders and their prevalences (ranked in descending order) from the Kuan 2018, GBD 2017<sup>1</sup>, and Barnett 2012<sup>2</sup> studies which are not reported in any of the other studies.

| Disease label (Kuan 2018)     | Prevalence per 10,000 (Kuan 2018) | Disease label (GBD 2017)  | Prevalence per 10,000 (GBD 2017) | Disease label (Barnett 2012) | Prevalence per 10,000 (Barnett 2012) |
|-------------------------------|-----------------------------------|---------------------------|----------------------------------|------------------------------|--------------------------------------|
| Personality Disorder          | 63                                | Mental disorders          | 1404                             |                              |                                      |
| Obsessive Compulsive Disorder | 44                                | Substance use disorders   | 313                              |                              |                                      |
| Delirium                      | 58                                | Major depressive disorder | 272                              |                              |                                      |
|                               |                                   | Other mental disorders    | 231                              |                              |                                      |
|                               |                                   | Dysthymia                 | 173                              |                              |                                      |
|                               |                                   | Conduct disorder          | 51                               |                              |                                      |
|                               |                                   | Opioid use disorders      | 43                               |                              |                                      |
|                               |                                   | Cannabis use disorders    | 41                               |                              |                                      |
|                               |                                   | Bulimia nervosa           | 34                               |                              |                                      |
|                               |                                   | Cocaine use disorders     | 32                               |                              |                                      |
|                               |                                   | Amphetamine use disorders | 23                               |                              |                                      |
|                               |                                   | Cannabis use disorders    | 14                               |                              |                                      |
|                               |                                   | Anorexia nervosa          | 10                               |                              |                                      |
|                               |                                   | Other drug use disorders  | 7                                |                              |                                      |

**Supplementary Table S10F.** Neurological diseases and their prevalences (ranked in descending order) from the Kuan 2018, GBD 2017<sup>1</sup>, and Barnett 2012<sup>2</sup> studies which are not reported in any of the other studies.

| Disease label (Kuan 2018)            | Prevalence per 10,000 (Kuan 2018) | Disease label (GBD 2017)     | Prevalence per 10,000 (GBD 2017) | Disease label (Barnett 2012) | Prevalence per 10,000 (Barnett 2012) |
|--------------------------------------|-----------------------------------|------------------------------|----------------------------------|------------------------------|--------------------------------------|
| Peripheral Neuropathy                | 218                               | Neurological disorders       | 4769                             |                              |                                      |
| Chronic Fatigue Syndrome             | 148                               | Headache disorders           | 4661                             |                              |                                      |
| Bell's Palsy                         | 76                                | Tension-type headache        | 3613                             |                              |                                      |
| Trigeminal Neuralgia                 | 55                                | Other neurological disorders | 0                                |                              |                                      |
| Diabetic Neuropathy                  | 41                                |                              |                                  |                              |                                      |
| Essential Tremor                     | 26                                |                              |                                  |                              |                                      |
| Autonomic Neuropathy                 | 26                                |                              |                                  |                              |                                      |
| Cerebral Palsy                       | 16                                |                              |                                  |                              |                                      |
| Idiopathic Intracranial Hypertension | 5                                 |                              |                                  |                              |                                      |
| Myasthenia Gravis                    | 4                                 |                              |                                  |                              |                                      |

**Supplementary Table S10G.** Eye and ear diseases and their prevalences (ranked in descending order) from the Kuan 2018, GBD 2017<sup>1</sup>, and Barnett 2012<sup>2</sup> studies which are not reported in any of the other studies.

| <b>Disease label (Kuan 2018)</b> | <b>Prevalence per 10,000 (Kuan 2018)</b> | <b>Disease label (GBD 2017)</b> | <b>Prevalence per 10,000 (GBD 2017)</b> | <b>Disease label (Barnett 2012)</b> | <b>Prevalence per 10,000 (Barnett 2012)</b> |
|----------------------------------|------------------------------------------|---------------------------------|-----------------------------------------|-------------------------------------|---------------------------------------------|
| Tinnitus                         | 322                                      | Near vision loss                | 378                                     |                                     |                                             |
| Diabetic Eye Disease             | 203                                      | Refraction disorders            | 221                                     |                                     |                                             |
| Anterior Uveitis                 | 71                                       | Other vision loss               | 46                                      |                                     |                                             |
| Retinal Detachment               | 58                                       |                                 |                                         |                                     |                                             |
| Keratitis                        | 51                                       |                                 |                                         |                                     |                                             |
| Scleritis                        | 46                                       |                                 |                                         |                                     |                                             |
| Retinal Vascular Occlusion       | 42                                       |                                 |                                         |                                     |                                             |
| Ptosis                           | 39                                       |                                 |                                         |                                     |                                             |
| Meniere's Disease                | 37                                       |                                 |                                         |                                     |                                             |
| Posterior Uveitis                | 6                                        |                                 |                                         |                                     |                                             |



**Supplementary Table S10H.** Cardiovascular diseases and their prevalences (ranked in descending order) from the Kuan 2018, GBD 2017<sup>1</sup>, and Barnett 2012<sup>2</sup> studies which are not reported in any of the other studies.

| Disease label (Kuan 2018)                        | Prevalence per 10,000 (Kuan 2018) | Disease label (GBD 2017)                      | Prevalence per 10,000 (GBD 2017) | Disease label (Barnett 2012)        | Prevalence per 10,000 (Barnett 2012) |
|--------------------------------------------------|-----------------------------------|-----------------------------------------------|----------------------------------|-------------------------------------|--------------------------------------|
| Stable Angina                                    | 455                               | Cardiovascular diseases                       | 1077                             | Coronary heart disease              | 470                                  |
| Myocardial Infarction                            | 299                               | Ischemic heart disease                        | 334                              | Stroke & transient ischaemic attack | 210                                  |
| Transient Ischaemic Attack                       | 190                               | Other cardiovascular and circulatory diseases | 249                              |                                     |                                      |
| Unstable Angina                                  | 159                               | Stroke                                        | 152                              |                                     |                                      |
| Venous thrombolism (Excl PE)                     | 153                               | Non-rheumatic valvular heart disease          | 123                              |                                     |                                      |
| Stroke – not otherwise specified                 | 112                               | Hypertensive heart disease                    | 15                               |                                     |                                      |
| Coronary Heart Disease (not otherwise specified) | 107                               | Cardiomyopathy and myocarditis                | 11                               |                                     |                                      |
| Raynauds Disease                                 | 102                               | Other cardiomyopathy                          | 8                                |                                     |                                      |
| Pulmonary Embolism                               | 100                               | Myocarditis                                   | 3                                |                                     |                                      |
| Supraventricular Tachycardia                     | 75                                | Endocarditis                                  | 2                                |                                     |                                      |
| Multiple valve disorder                          | 58                                | Other non-rheumatic valve diseases            | 0                                |                                     |                                      |
| Left Bundle Branch Block                         | 55                                |                                               |                                  |                                     |                                      |
| Right Bundle Branch Block                        | 55                                |                                               |                                  |                                     |                                      |
| Abdominal Aortic Aneurysm                        | 54                                |                                               |                                  |                                     |                                      |
| Atrioventricular Block, first degree             | 35                                |                                               |                                  |                                     |                                      |
| Cardiomyopathy – other                           | 26                                |                                               |                                  |                                     |                                      |
| Ventricular Tachycardia                          | 20                                |                                               |                                  |                                     |                                      |
| Atrioventricular Block, third degree             | 20                                |                                               |                                  |                                     |                                      |
| Primary Pulmonary Hypertension                   | 19                                |                                               |                                  |                                     |                                      |
| Pericardial Effusion                             | 16                                |                                               |                                  |                                     |                                      |
| Atrioventricular Block, second degree            | 13                                |                                               |                                  |                                     |                                      |
| Sick Sinus Syndrome                              | 13                                |                                               |                                  |                                     |                                      |
| Subdural haematoma                               | 12                                |                                               |                                  |                                     |                                      |
| Secondary Pulmonary Hypertension                 | 11                                |                                               |                                  |                                     |                                      |
| Hypertrophic cardiomyopathy                      | 6                                 |                                               |                                  |                                     |                                      |
| Trifascicular Block                              | 5                                 |                                               |                                  |                                     |                                      |
| Bifascicular Block                               | 4                                 |                                               |                                  |                                     |                                      |

**Supplementary Table S10I.** Respiratory diseases and their prevalences (ranked in descending order) from the Kuan 2018, GBD 2017<sup>1</sup>, and Barnett 2012<sup>2</sup> studies which are not reported in any of the other studies.

| Disease label (Kuan 2018)     | Prevalence per 10,000 (Kuan 2018) | Disease label (GBD 2017)           | Prevalence per 10,000 (GBD 2017) | Disease label (Barnett 2012) | Prevalence per 10,000 (Barnett 2012) |
|-------------------------------|-----------------------------------|------------------------------------|----------------------------------|------------------------------|--------------------------------------|
| Allergic/chronic Rhinitis     | 1493                              | Chronic respiratory diseases       | 1536                             |                              |                                      |
| Pleural Effusion              | 164                               | Pneumoconiosis                     | 1                                |                              |                                      |
| Nasal Polyps                  | 109                               | Other pneumoconiosis               | 0                                |                              |                                      |
| Sleep apnoea                  | 101                               | Coal workers pneumoconiosis        | 0                                |                              |                                      |
| Respiratory Failure           | 82                                | Silicosis                          | 0                                |                              |                                      |
| Pulmonary Collapse            | 56                                | Other chronic respiratory diseases | 0                                |                              |                                      |
| Pneumothorax                  | 48                                |                                    |                                  |                              |                                      |
| Aspiration Pneumonitis        | 41                                |                                    |                                  |                              |                                      |
| Hypertrophic Nasal Turbinates | 36                                |                                    |                                  |                              |                                      |
| Pleural Plaque                | 22                                |                                    |                                  |                              |                                      |

**Supplementary Table S10J.** Oral diseases and their prevalences (ranked in descending order) from the Kuan 2018, GBD 2017<sup>1</sup>, and Barnett 2012<sup>2</sup> studies which are not reported in any of the other studies.

| Disease label (Kuan 2018) | Prevalence per 10,000 (Kuan 2018) | Disease label (GBD 2017)         | Prevalence per 10,000 (GBD 2017) | Disease label (Barnett 2012) | Prevalence per 10,000 (Barnett 2012) |
|---------------------------|-----------------------------------|----------------------------------|----------------------------------|------------------------------|--------------------------------------|
|                           |                                   | Oral disorders                   | 4781                             |                              |                                      |
|                           |                                   | Caries of permanent teeth        | 3679                             |                              |                                      |
|                           |                                   | Periodontal diseases             | 1082                             |                              |                                      |
|                           |                                   | Edentulism and severe tooth loss | 631                              |                              |                                      |
|                           |                                   | Caries of deciduous teeth        | 237                              |                              |                                      |
|                           |                                   | Other oral disorders             | 197                              |                              |                                      |

**Supplementary Table S10K.** Digestive diseases and their prevalences (ranked in descending order) from the Kuan 2018, GBD 2017<sup>1</sup>, and Barnett 2012<sup>2</sup> studies which are not reported in any of the other studies.

| Disease label (Kuan 2018) | Prevalence per 10,000 (Kuan 2018) | Disease label (GBD 2017)                                       | Prevalence per 10,000 (GBD 2017) | Disease label (Barnett 2012) | Prevalence per 10,000 (Barnett 2012) |
|---------------------------|-----------------------------------|----------------------------------------------------------------|----------------------------------|------------------------------|--------------------------------------|
| Oesophageal Ulcer         | 585                               | Digestive diseases                                             | 2576                             | Treated dyspepsia            | 450                                  |
| Diaphragmatic Hernia      | 498                               | Cirrhosis and other chronic liver diseases                     | 1407                             | Treated constipation         | 220                                  |
| Cholelithiasis            | 344                               | Upper digestive system diseases                                | 1325                             | Inflammatory bowel disease   | 60                                   |
| Anal Fissure              | 238                               | Cirrhosis due to NASH                                          | 1132                             | Chronic liver disease        | 10                                   |
| Cholecystitis             | 172                               | Cirrhosis and other chronic liver diseases due to hepatitis B  | 94                               |                              |                                      |
| Ulcerative Colitis        | 66                                | Cirrhosis and other chronic liver diseases due to alcohol use  | 75                               |                              |                                      |
| Peritonitis               | 66                                | Gallbladder and biliary diseases                               | 72                               |                              |                                      |
| Barrett's Oesophagus      | 53                                | Cirrhosis and other chronic liver diseases due to hepatitis C  | 59                               |                              |                                      |
| Anorectal Fistula         | 46                                | Inflammatory bowel disease                                     | 54                               |                              |                                      |
| Crohns Disease            | 41                                | Cirrhosis and other chronic liver diseases due to other causes | 48                               |                              |                                      |
| Fatty Liver               | 40                                | Paralytic ileus and intestinal obstruction                     | 0                                |                              |                                      |
| Coeliac Disease           | 34                                | Other digestive diseases                                       | 0                                |                              |                                      |
| Cirrhosis                 | 34                                |                                                                |                                  |                              |                                      |
| Alcoholic Liver Disease   | 33                                |                                                                |                                  |                              |                                      |
| Anorectal Prolapse        | 33                                |                                                                |                                  |                              |                                      |
| Cholangitis               | 19                                |                                                                |                                  |                              |                                      |
| Liver Failure             | 14                                |                                                                |                                  |                              |                                      |
| Oesophageal Varices       | 13                                |                                                                |                                  |                              |                                      |
| Portal Hypertension       | 12                                |                                                                |                                  |                              |                                      |
| Volvulus                  | 12                                |                                                                |                                  |                              |                                      |
| Autoimmune liver disease  | 7                                 |                                                                |                                  |                              |                                      |

**Supplementary Table S10L.** Skin diseases and their prevalences (ranked in descending order) from the Kuan 2018, GBD 2017<sup>1</sup>, and Barnett 2012<sup>2</sup> studies which are not reported in any of the other studies.

| Disease label (Kuan 2018) | Prevalence per 10,000 (Kuan 2018) | Disease label (GBD 2017)             | Prevalence per 10,000 (GBD 2017) | Disease label (Barnett 2012) | Prevalence per 10,000 (Barnett 2012) |
|---------------------------|-----------------------------------|--------------------------------------|----------------------------------|------------------------------|--------------------------------------|
| Actinic keratosis         | 273                               | Skin and subcutaneous diseases       | 3290                             | Psoriasis or eczema          | 70                                   |
| Rosacea                   | 250                               | Other skin and subcutaneous diseases | 1233                             |                              |                                      |
| Pilonidal cyst/sinus      | 88                                | Atopic dermatitis                    | 557                              |                              |                                      |
| Lichen Planus             | 62                                | Contact dermatitis                   | 127                              |                              |                                      |
| Vitiligo                  | 36                                | Pruritus                             | 94                               |                              |                                      |
| Hidradenitis              | 27                                | Decubitus ulcer                      | 4                                |                              |                                      |

**Supplementary Table S10M.** Musculoskeletal diseases and their prevalences (ranked in descending order) from the Kuan 2018, GBD 2017<sup>1</sup>, and Barnett 2012<sup>2</sup> studies which are not reported in any of the other studies.

| Disease label (Kuan 2018)    | Prevalence per 10,000 (Kuan 2018) | Disease label (GBD 2017)        | Prevalence per 10,000 (GBD 2017) | Disease label (Barnett 2012)                                                                        | Prevalence per 10,000 (Barnett 2012) |
|------------------------------|-----------------------------------|---------------------------------|----------------------------------|-----------------------------------------------------------------------------------------------------|--------------------------------------|
| Enthesopathy                 | 1854                              | Musculoskeletal disorders       | 2821                             | Painful condition                                                                                   | 720                                  |
| Spondylosis                  | 458                               | Low back pain                   | 1568                             | Rheumatoid arthritis, other inflammatory polyarthropathies & systematic connective tissue disorders | 340                                  |
| Carpal Tunnel Syndrome       | 370                               | Neck pain                       | 681                              |                                                                                                     |                                      |
| Fracture – Wrist             | 320                               | Other musculoskeletal disorders | 419                              |                                                                                                     |                                      |
| Intervertebral Disc Disorder | 315                               |                                 |                                  |                                                                                                     |                                      |
| Osteoporosis                 | 303                               |                                 |                                  |                                                                                                     |                                      |
| Fracture – Hip               | 123                               |                                 |                                  |                                                                                                     |                                      |
| Fibromatosis                 | 112                               |                                 |                                  |                                                                                                     |                                      |
| Polymyalgia Rheumatica       | 90                                |                                 |                                  |                                                                                                     |                                      |
| Spinal Stenosis              | 80                                |                                 |                                  |                                                                                                     |                                      |
| Scoliosis                    | 78                                |                                 |                                  |                                                                                                     |                                      |
| Spondylolisthesis            | 36                                |                                 |                                  |                                                                                                     |                                      |
| Collapsed Vertebra           | 29                                |                                 |                                  |                                                                                                     |                                      |
| Psoriatic Arthritis          | 24                                |                                 |                                  |                                                                                                     |                                      |
| Ankylosing Spondylosis       | 19                                |                                 |                                  |                                                                                                     |                                      |
| Giant Cell Arteritis         | 18                                |                                 |                                  |                                                                                                     |                                      |
| Lupus Erythematosus          | 16                                |                                 |                                  |                                                                                                     |                                      |
| Sjogren Syndrome             | 11                                |                                 |                                  |                                                                                                     |                                      |
| Reactive Arthritis           | 11                                |                                 |                                  |                                                                                                     |                                      |
| Juvenile Arthritis           | 6                                 |                                 |                                  |                                                                                                     |                                      |
| Scleroderma                  | 4                                 |                                 |                                  |                                                                                                     |                                      |
| Enteropathic Arthropathy     | 1                                 |                                 |                                  |                                                                                                     |                                      |

**Supplementary Table S10N.** Genitourinary diseases and their prevalences (ranked in descending order) from the Kuan 2018, GBD 2017<sup>1</sup>, and Barnett 2012<sup>2</sup> studies which are not reported in any of the other studies.

| Disease label (Kuan 2018)       | Prevalence per 10,000 (Kuan 2018) | Disease label (GBD 2017)                                   | Prevalence per 10,000 (GBD 2017) | Disease label (Barnett 2012) | Prevalence per 10,000 (Barnett 2012) |
|---------------------------------|-----------------------------------|------------------------------------------------------------|----------------------------------|------------------------------|--------------------------------------|
| Menorrhagia                     | 1377                              | Gynecological diseases                                     | 1068                             |                              |                                      |
| Erectile Dysfunction            | 916                               | Chronic kidney disease due to other and unspecified causes | 623                              |                              |                                      |
| Dysmenorrhoea                   | 597                               | Premenstrual syndrome                                      | 497                              |                              |                                      |
| Urinary Incontinence            | 400                               | Urinary diseases and male infertility                      | 206                              |                              |                                      |
| Postmenopausal Bleeding         | 395                               | Chronic kidney disease due to diabetes mellitus type 2     | 142                              |                              |                                      |
| Postcoital Bleeding             | 258                               | Other gynecological diseases                               | 94                               |                              |                                      |
| Hydrocele                       | 204                               | Chronic kidney disease due to glomerulonephritis           | 49                               |                              |                                      |
| Acute Kidney Injury             | 200                               | Chronic kidney disease due to hypertension                 | 26                               |                              |                                      |
| Neuropathic Bladder             | 100                               | Chronic kidney disease due to diabetes mellitus type 1     | 5                                |                              |                                      |
| Undescended Testis              | 89                                | Other urinary diseases                                     | 0                                |                              |                                      |
| Obstructive and reflux uropathy | 87                                |                                                            |                                  |                              |                                      |
| Endometrial Hyperplasia         | 72                                |                                                            |                                  |                              |                                      |
| Tubulo-interstitial Nephropathy | 32                                |                                                            |                                  |                              |                                      |
| End Stage Renal Disease         | 29                                |                                                            |                                  |                              |                                      |
| Chronic Cystitis                | 21                                |                                                            |                                  |                              |                                      |

**Supplementary Table S10O.** Maternal disorders and their prevalences (ranked in descending order) from the Kuan 2018, GBD 2017<sup>1</sup>, and Barnett 2012<sup>2</sup> studies which are not reported in any of the other studies.

| Disease label (Kuan 2018) | Prevalence per 10,000 (Kuan 2018) | Disease label (GBD 2017)                      | Prevalence per 10,000 (GBD 2017) | Disease label (Barnett 2012) | Prevalence per 10,000 (Barnett 2012) |
|---------------------------|-----------------------------------|-----------------------------------------------|----------------------------------|------------------------------|--------------------------------------|
|                           |                                   | Maternal disorders                            | 8                                |                              |                                      |
|                           |                                   | Maternal hypertensive disorders               | 5                                |                              |                                      |
|                           |                                   | Maternal sepsis and other maternal infections | 1                                |                              |                                      |
|                           |                                   | Maternal hemorrhage                           | 1                                |                              |                                      |
|                           |                                   | Maternal obstructed labor and uterine rupture | 0                                |                              |                                      |
|                           |                                   | Maternal abortion and miscarriage             | 0                                |                              |                                      |
|                           |                                   | Ectopic pregnancy                             | 0                                |                              |                                      |
|                           |                                   | Other maternal disorders                      | 0                                |                              |                                      |

**Supplementary Table S10P.** Perinatal and congenital disorders and their prevalences (ranked in descending order) from the Kuan 2018, GBD 2017<sup>1</sup>, and Barnett 2012<sup>2</sup> studies which are not reported in any of the other studies.

| Disease label (Kuan 2018)           | Prevalence per 10,000 (Kuan 2018) | Disease label (GBD 2017)                                 | Prevalence per 10,000 (GBD 2017) | Disease label (Barnett 2012) | Prevalence per 10,000 (Barnett 2012) |
|-------------------------------------|-----------------------------------|----------------------------------------------------------|----------------------------------|------------------------------|--------------------------------------|
| Low Birth Weight                    | 56                                | Congenital birth defects                                 | 186                              |                              |                                      |
| Intrauterine Hypoxia                | 47                                | Neonatal disorders                                       | 152                              |                              |                                      |
| Respiratory Distress of the Newborn | 42                                | Digestive congenital anomalies                           | 77                               |                              |                                      |
| High Birth Weight                   | 10                                | Congenital musculoskeletal and limb anomalies            | 51                               |                              |                                      |
| Patent Ductus Arteriosus            | 10                                | Neonatal encephalopathy due to birth asphyxia and trauma | 32                               |                              |                                      |
| Post-term Delivery                  | 8                                 | Other congenital birth defects                           | 23                               |                              |                                      |
|                                     |                                   | Orofacial clefts                                         | 14                               |                              |                                      |
|                                     |                                   | Other chromosomal abnormalities                          | 13                               |                              |                                      |
|                                     |                                   | Urogenital congenital anomalies                          | 10                               |                              |                                      |
|                                     |                                   | Turner syndrome                                          | 1                                |                              |                                      |
|                                     |                                   | Klinefelter syndrome                                     | 0                                |                              |                                      |
|                                     |                                   | Other neonatal disorders                                 | 0                                |                              |                                      |

**Supplementary Table S10Q.** Injuries and their prevalences (ranked in descending order) from the Kuan 2018, GBD 2017<sup>1</sup>, and Barnett 2012<sup>2</sup> studies which are not reported in any of the other studies.

| Disease label (Kuan 2018) | Prevalence per 10,000 (Kuan 2018) | Disease label (GBD 2017)                        | Prevalence per 10,000 (GBD 2017) | Disease label (Barnett 2012) | Prevalence per 10,000 (Barnett 2012) |
|---------------------------|-----------------------------------|-------------------------------------------------|----------------------------------|------------------------------|--------------------------------------|
|                           |                                   | Injuries                                        | 3000                             |                              |                                      |
|                           |                                   | Unintentional injuries                          | 2469                             |                              |                                      |
|                           |                                   | Falls                                           | 1237                             |                              |                                      |
|                           |                                   | Other unintentional injuries                    | 556                              |                              |                                      |
|                           |                                   | Exposure to mechanical forces                   | 444                              |                              |                                      |
|                           |                                   | Other exposure to mechanical forces             | 435                              |                              |                                      |
|                           |                                   | Transport injuries                              | 297                              |                              |                                      |
|                           |                                   | Road injuries                                   | 257                              |                              |                                      |
|                           |                                   | Self-harm and interpersonal violence            | 235                              |                              |                                      |
|                           |                                   | Interpersonal violence                          | 193                              |                              |                                      |
|                           |                                   | Fire, heat, and hot substances                  | 145                              |                              |                                      |
|                           |                                   | Sexual violence                                 | 136                              |                              |                                      |
|                           |                                   | Motor vehicle road injuries                     | 78                               |                              |                                      |
|                           |                                   | Cyclist road injuries                           | 70                               |                              |                                      |
|                           |                                   | Motocyclist road injuries                       | 50                               |                              |                                      |
|                           |                                   | Pedestrian road injuries                        | 44                               |                              |                                      |
|                           |                                   | Physical violence by other means                | 43                               |                              |                                      |
|                           |                                   | Other transport injuries                        | 40                               |                              |                                      |
|                           |                                   | Self-harm                                       | 35                               |                              |                                      |
|                           |                                   | Self-harm by other specified means              | 35                               |                              |                                      |
|                           |                                   | Foreign body                                    | 25                               |                              |                                      |
|                           |                                   | Animal contact                                  | 25                               |                              |                                      |
|                           |                                   | Environmental heat and cold exposure            | 20                               |                              |                                      |
|                           |                                   | Non-venomous animal contact                     | 18                               |                              |                                      |
|                           |                                   | Foreign body in other body part                 | 17                               |                              |                                      |
|                           |                                   | Other road injuries                             | 16                               |                              |                                      |
|                           |                                   | Poisonings                                      | 14                               |                              |                                      |
|                           |                                   | Poisoning by other means                        | 12                               |                              |                                      |
|                           |                                   | Physical violence by sharp object               | 11                               |                              |                                      |
|                           |                                   | Unintentional firearm injuries                  | 9                                |                              |                                      |
|                           |                                   | Venomous animal contact                         | 7                                |                              |                                      |
|                           |                                   | Conflict and terrorism                          | 6                                |                              |                                      |
|                           |                                   | Pulmonary aspiration and foreign body in airway | 5                                |                              |                                      |
|                           |                                   | Foreign body in eyes                            | 3                                |                              |                                      |
|                           |                                   | Physical violence by firearm                    | 3                                |                              |                                      |
|                           |                                   | Poisoning by carbon monoxide                    | 2                                |                              |                                      |
|                           |                                   | Adverse effects of medical treatment            | 2                                |                              |                                      |
|                           |                                   | Drowning                                        | 2                                |                              |                                      |
|                           |                                   | Executions and police conflict                  | 1                                |                              |                                      |
|                           |                                   | Exposure to forces of nature                    | 0                                |                              |                                      |
|                           |                                   | Self-harm by firearm                            | 0                                |                              |                                      |

**Supplementary Table S10R.** General causes spanning several categories and their prevalences (ranked in descending order) from the Kuan 2018, GBD 2017<sup>1</sup>, and Barnett 2012<sup>2</sup> studies which are not reported in any of the other studies.

| Disease label (Kuan 2018) | Prevalence per 10,000 (Kuan 2018) | Disease label (GBD 2017)                                               | Prevalence per 10,000 (GBD 2017) | Disease label (Barnett 2012) | Prevalence per 10,000 (Barnett 2012) |
|---------------------------|-----------------------------------|------------------------------------------------------------------------|----------------------------------|------------------------------|--------------------------------------|
|                           |                                   | Non-communicable diseases                                              | 9213                             |                              |                                      |
|                           |                                   | Other non-communicable diseases                                        | 6170                             |                              |                                      |
|                           |                                   | Communicable, maternal, neonatal, and nutritional diseases             | 3463                             |                              |                                      |
|                           |                                   | Sense organ diseases                                                   | 2239                             |                              |                                      |
|                           |                                   | Diabetes and kidney diseases                                           | 1499                             |                              |                                      |
|                           |                                   | Other sense organ diseases                                             | 192                              |                              |                                      |
|                           |                                   | Maternal and neonatal disorders                                        | 159                              |                              |                                      |
|                           |                                   | Endocrine, metabolic, blood, and immune disorders                      | 137                              |                              |                                      |
|                           |                                   | Myelodysplastic, myeloproliferative, and other hematopoietic neoplasms | 4                                |                              |                                      |



**Supplementary Figure S1.** Criteria for inclusion of health conditions in this analysis were based on FCE's, prevalence and clinical importance. FCE's were obtained from NHS Digital hospital admitted patient care activity data for England between 1 April 2014 and 31 March 2015. Abbreviations: FCE: Finished consultant episodes; ICD-10: International Classification of Diseases, tenth revision.

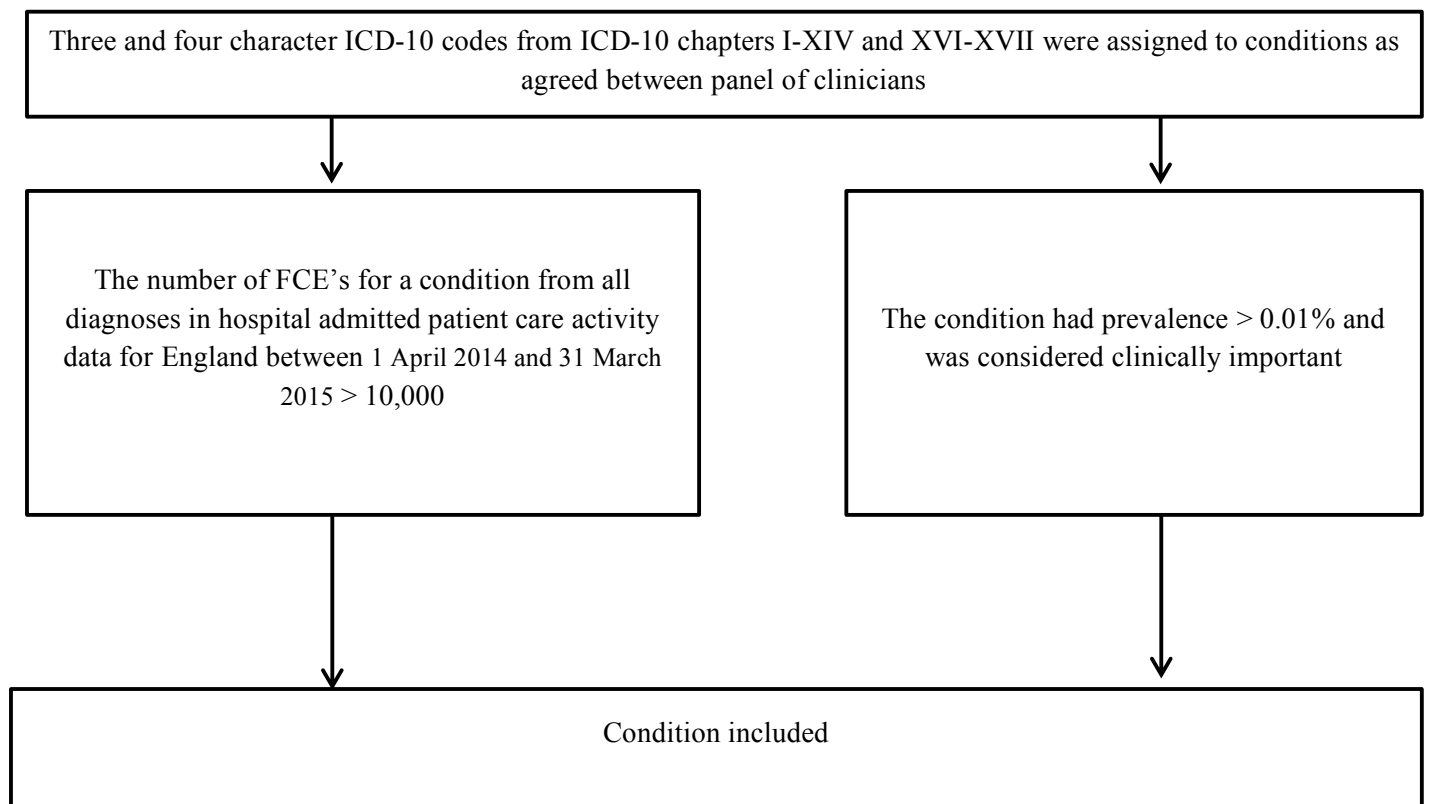

**Supplementary Figure S2.** Scatter plot of prevalence estimates between A) GBD<sup>1</sup> and Kuan studies where the prevalence in both studies was < 5%, B) Barnett<sup>2</sup> and Kuan studies where the prevalence in both studies was < 5%, C) GBD<sup>1</sup> and Kuan studies where the prevalence in at least one of the studies was > 5%, and D) Barnett<sup>2</sup> and Kuan studies where the prevalence in at least one of the studies was > 5%. The Kuan study used period prevalence, while the GBD<sup>1</sup> and Barnett<sup>2</sup> studies used point prevalence estimates.

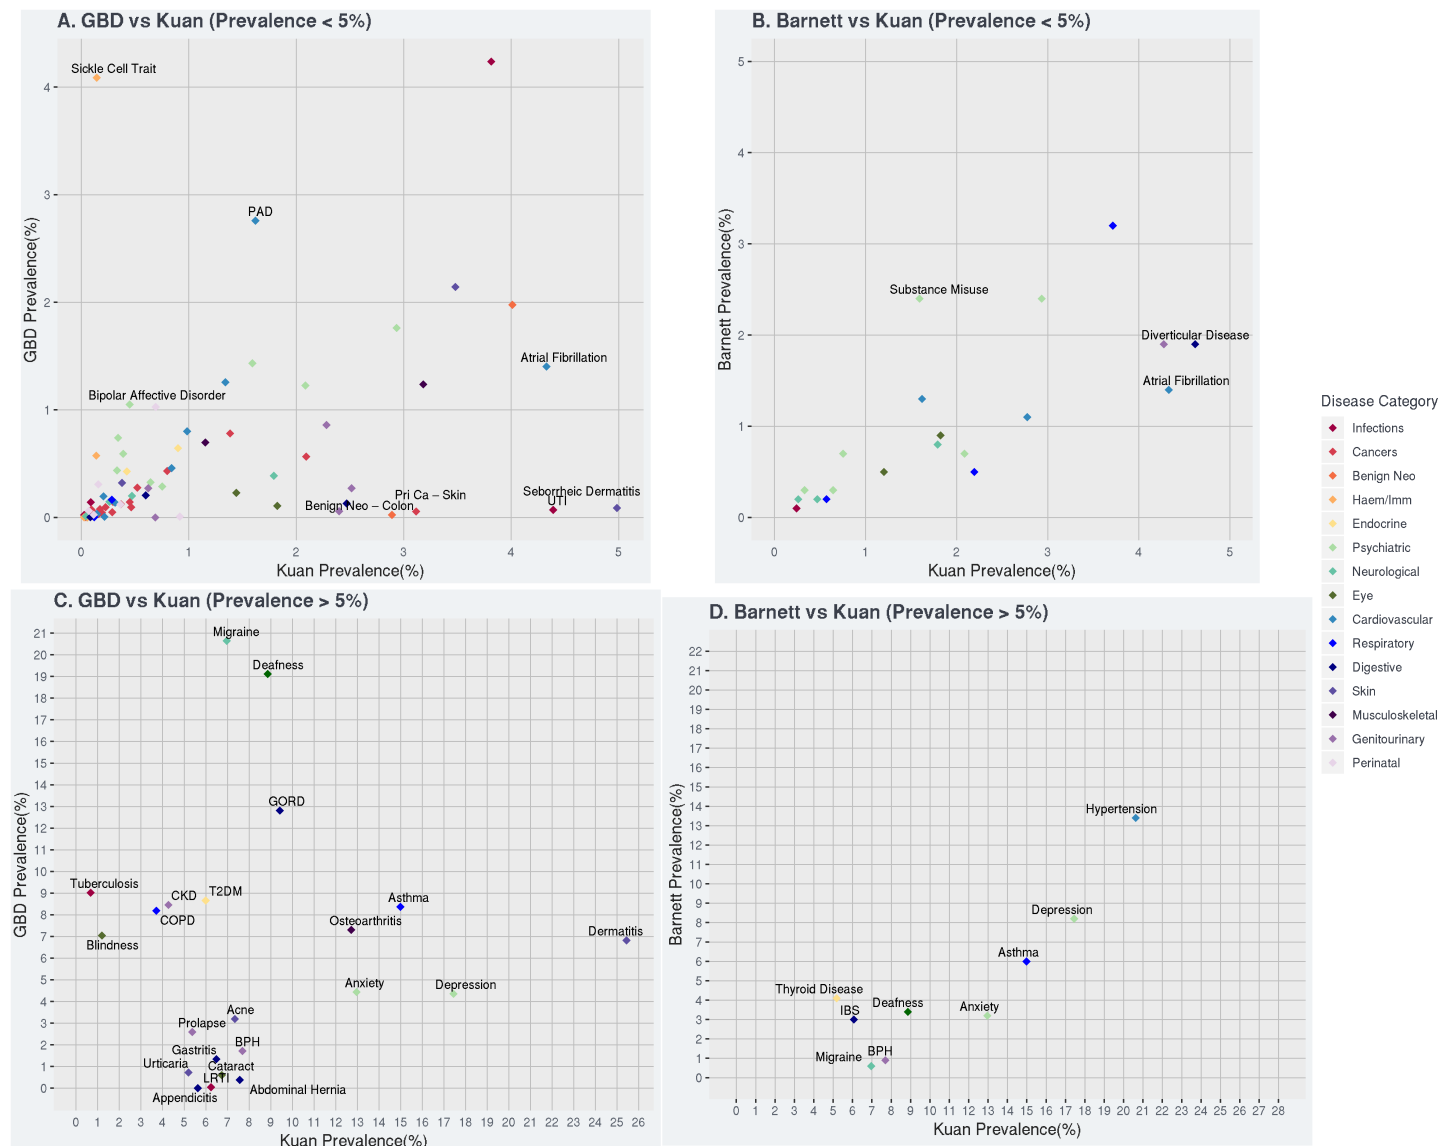

**Supplementary Figure S3.** Sex-standardised period prevalence (%) of the top 50 diseases and all cancers between 1 April 2010 and 31 March 2015 for individuals aged A) 1-9+ years, B) 10-19+ years, C) aged 20-29+ years, D) aged 30-39+ years, E) aged 40-49+ years, F) aged 50-59+ years, G) aged 60-69+ years, H) aged 70-79+ years, I) aged 80+ years on 1 April 2010

**A. 1-9+y**

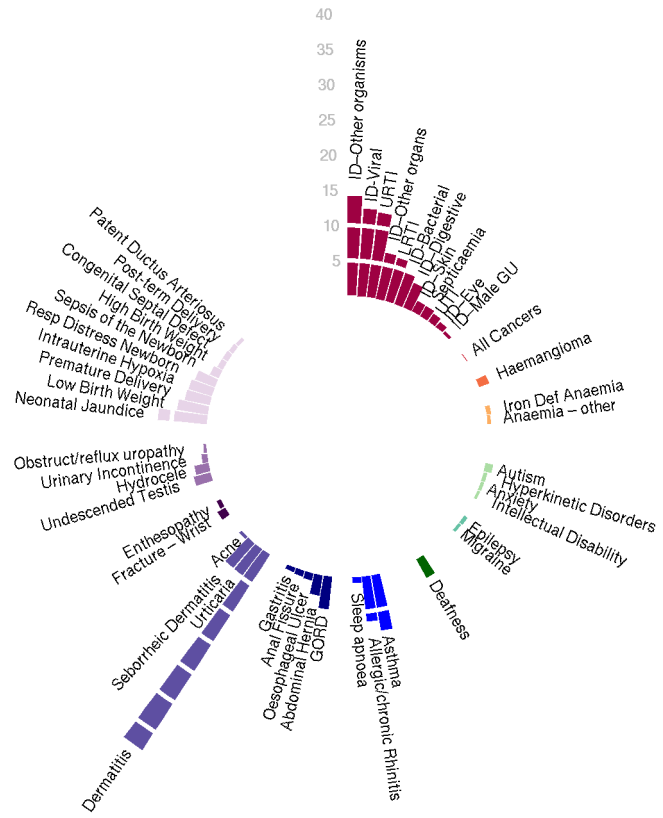

**B. 10-19+y**

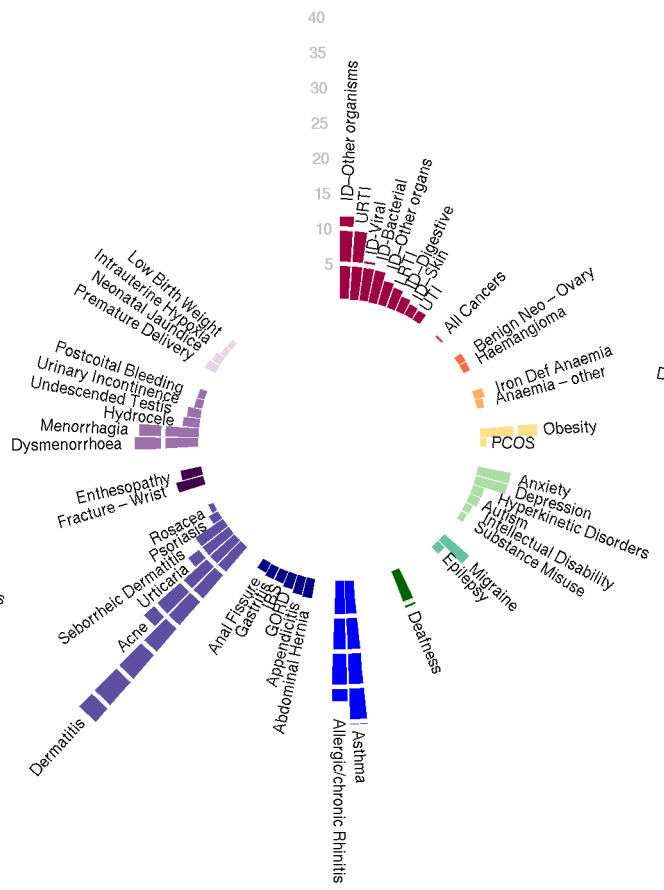

**C. 20-29+y**

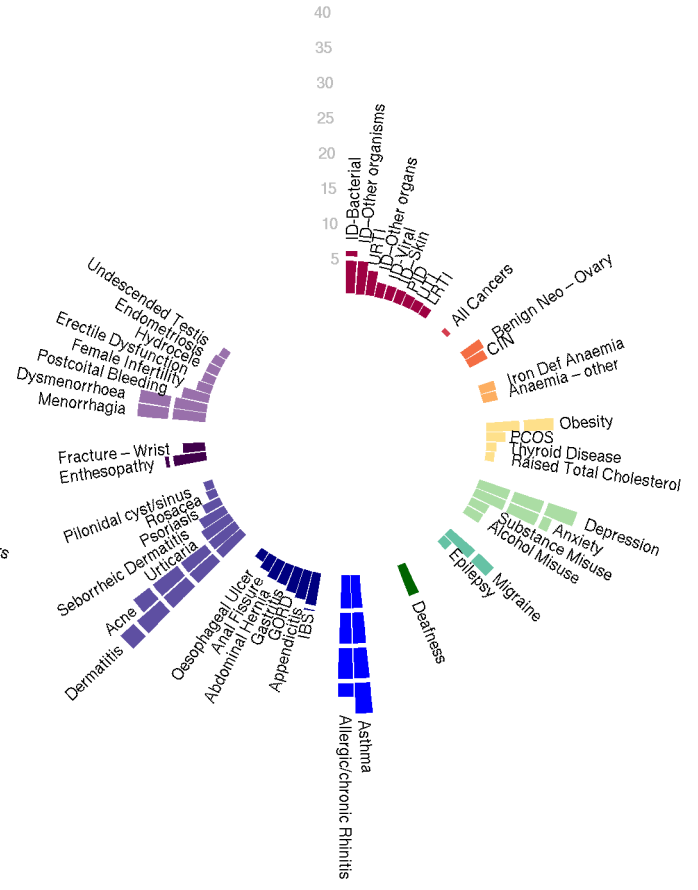





**Supplementary Figure S4.** Histogram of age at first record for thalassaemia and cystic fibrosis. The x-axis represents 10 year age bins, the y-axis represents frequency counts.

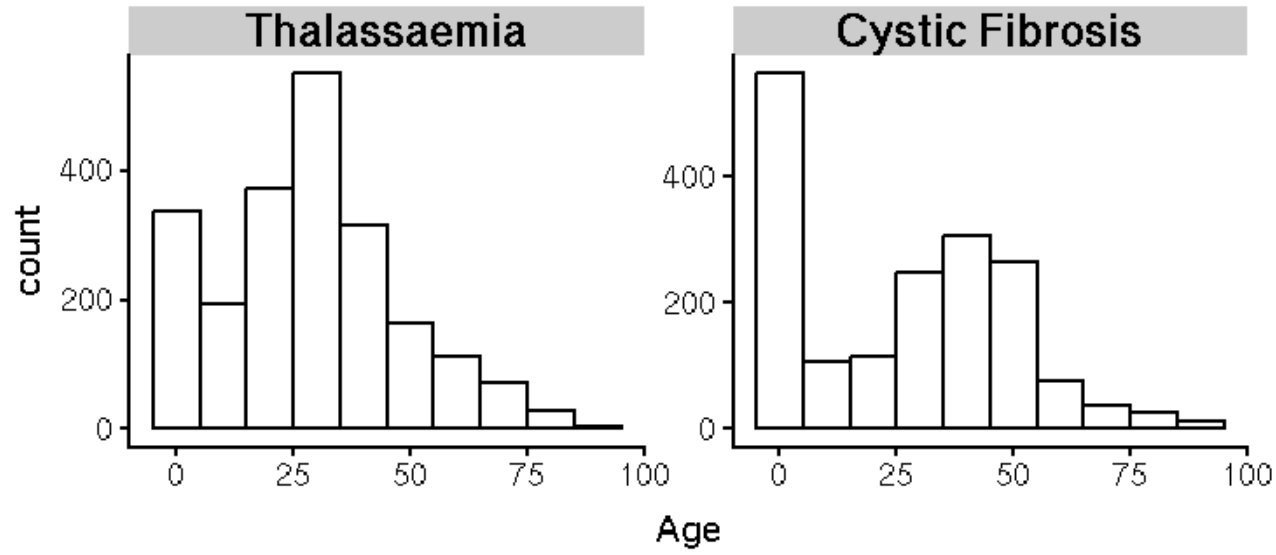

## References

- <sup>1</sup> GBD 2017 Disease and Injury Incidence and Prevalence Collaborators. Global, regional, and national incidence, prevalence, and years lived with disability for 354 diseases and injuries for 195 countries and territories, 1990–2017: a systematic analysis for the Global Burden of Disease Study 2017. *Lancet* 2018;392:1789–858. doi: [http://dx.doi.org/10.1016/S0140-6736\(18\)32279-7](http://dx.doi.org/10.1016/S0140-6736(18)32279-7).
- <sup>2</sup> Barnett K, Mercer S, Norbury M, Watt G, Wyke S, Guthrie B. The epidemiology of multimorbidity in a large cross-sectional dataset: implications for health care, research and medical education. *Lancet* 2012;380:37-43.
- <sup>3</sup> Kay J, Gawkrödger DJ, Mortimer MJ, Jaron AG. The prevalence of childhood atopic eczema in a general population. *J Am Acad Dermatol.* 1994; 30:35–39
- <sup>4</sup> Montnemery P, Nihlén U, Göran Löfdahl C, Nyberg P, Svensson Å. Prevalence of self-reported eczema in relation to living environment, socio-economic status and respiratory symptoms assessed in a questionnaire study. *BMC Dermatology.* 2003;3:4. doi:10.1186/1471-5945-3-4.
- <sup>5</sup> Stewart WF, Roy J, Lipton RB. Migraine prevalence, socioeconomic status, and social causation. *Neurology.* 2013;81(11):948-955. doi:10.1212/WNL.0b013e3182a43b32.
- <sup>6</sup> Singleton N, Bumpstead R, O'Brien M, et al. (2001) *Psychiatric Morbidity Among Adults Living in Private Households, 2000.* London: The Stationery Office.
- <sup>7</sup> <https://digital.nhs.uk/data-and-information/publications/statistical/quality-and-outcomes-framework-achievement-prevalence-and-exceptions-data/quality-and-outcomes-framework-qof-2014-15>. Accessed 20 December 2018.
- <sup>8</sup> Action on Hearing Loss, 2015. *Hearing Matters.* London. <https://www.actiononhearingloss.org.uk/-/media/ahl/documents/research-and-policy/reports/hearing-matters-report.pdf>. Accessed 20 December 2018.
- <sup>9</sup> Davis AC, 1995. *Hearing in adults.* London: Whurr.
- <sup>10</sup> Public Health England. (2017) *Tuberculosis in England: 2017.* Public Health England, London. [https://assets.publishing.service.gov.uk/government/uploads/system/uploads/attachment\\_data/file/686185/TB\\_Annual\\_Report\\_2017\\_v1.1.pdf](https://assets.publishing.service.gov.uk/government/uploads/system/uploads/attachment_data/file/686185/TB_Annual_Report_2017_v1.1.pdf). Accessed 20 December 2018.
- <sup>11</sup> <https://statistics.blf.org.uk/asthma>. Accessed 20 December 2018.
- <sup>12</sup> Ruhl CE, Everhart JE. Risk factors for inguinal hernia among adults in the US population. *Am J Epidemiol.* 2007 May 15. 165(10):1154-61.
- <sup>13</sup> Primatesta P, Goldacre MJ. Inguinal hernia repair: incidence of elective and emergency surgery, readmission and mortality. *Int J Epidemiol.* 1996 Aug;25(4):835-9.
